# Supplementary material for: A metal-free strategy for the cross-dehydrogenative coupling of 1,3-dicarbonyl compounds with 2-methoxyethanol
Source: Royal Society of Chemistry journal article supplement (doi:10.1039/d1ob02290c), 2022-01-01

# Supporting Information

For

## **A Metal-Free Strategy for the Cross-Dehydrogenative Coupling of the 1, 3-Dicarbonyl Compounds with 2-Methoxyethanol**

Vishal Suresh Kudale,<sup>a</sup> Sheng Zheng,<sup>a</sup> Sheng-Hua Huang,<sup>a</sup> Yu-Lun Chang,<sup>a</sup> and Jeh-Jeng Wang<sup>\*a, b</sup>

<sup>a</sup> Department of Medicinal and Applied Chemistry, Kaohsiung Medical University, No. 100, Shiquan 1st Rd, Sanmin District, Kaohsiung City, 807, Taiwan.

<sup>b</sup> Department of Medical Research, Kaohsiung Medical University Hospital, No. 100 Tzyou 1st Rd, Sanmin District, Kaohsiung City 807, Taiwan.

E-mail: [jjwang@kmu.edu.tw](mailto:jjwang@kmu.edu.tw)

## Table of Contents

|                                             |         |
|---------------------------------------------|---------|
| 1) General Information                      | S3      |
| 2) Mechanistic studies                      | S3-S4   |
| 3) Experimental Procedures                  | S5- S6  |
| 4) Spectral Characterization                | S7-S22  |
| 5) References                               | S23     |
| 6) Copies of $^1\text{H}$ & $^{13}\text{C}$ | S24-S69 |
| 7) X-Ray crystallographic data              | S60-S67 |

## (1) General Information

$^1\text{H}$ ,  $^{13}\text{C}$ , and DEPT NMR spectra were recorded on a 400 MHz Varian Unity Plus or Varian Mercury plus spectrometer. The chemical shift ( $\delta$ ) values are reported in parts per million (ppm), and the coupling constants ( $J$ ) are given in Hz. The spectra were recorded using  $\text{CDCl}_3$  as a solvent.  $^1\text{H}$  NMR chemical shifts are referenced to tetramethylsilane (TMS) (0 ppm).  $^{13}\text{C}$  NMR was referenced to  $\text{CDCl}_3$  (77.0 ppm) or  $\text{DMSO-d}_6$  (39.51 ppm). The abbreviations used are as follows: s, singlet; d, doublet; t, triplet; q, quartet; dd, doublet of doublet; ddd, doublet of doublet; dt, doublet of triplets; td, triplet of doublet; m, multiplet. Mass spectra and high-resolution mass spectra (HRMS) were measured using the ESI (FT-MS solariX) at National Sun Yat-Sen University, Kaohsiung, Taiwan. Melting points were determined on an EZ-Melt (Automated melting point apparatus). All products reported showed  $^1\text{H}$  NMR spectra in agreement with the assigned structures. Reaction progress and product mixtures were routinely monitored by TLC using Merck TLC aluminum sheets (silica gel 60 F254). Column chromatography was carried out with 230–400 mesh silica gel 60 (Merck) and a mixture of hexane/ethyl acetate or hexane as eluent. Preparative TLC was run on Merck TLC aluminum sheets (silica gel 60 F254).

## (2) Mechanistic studies:

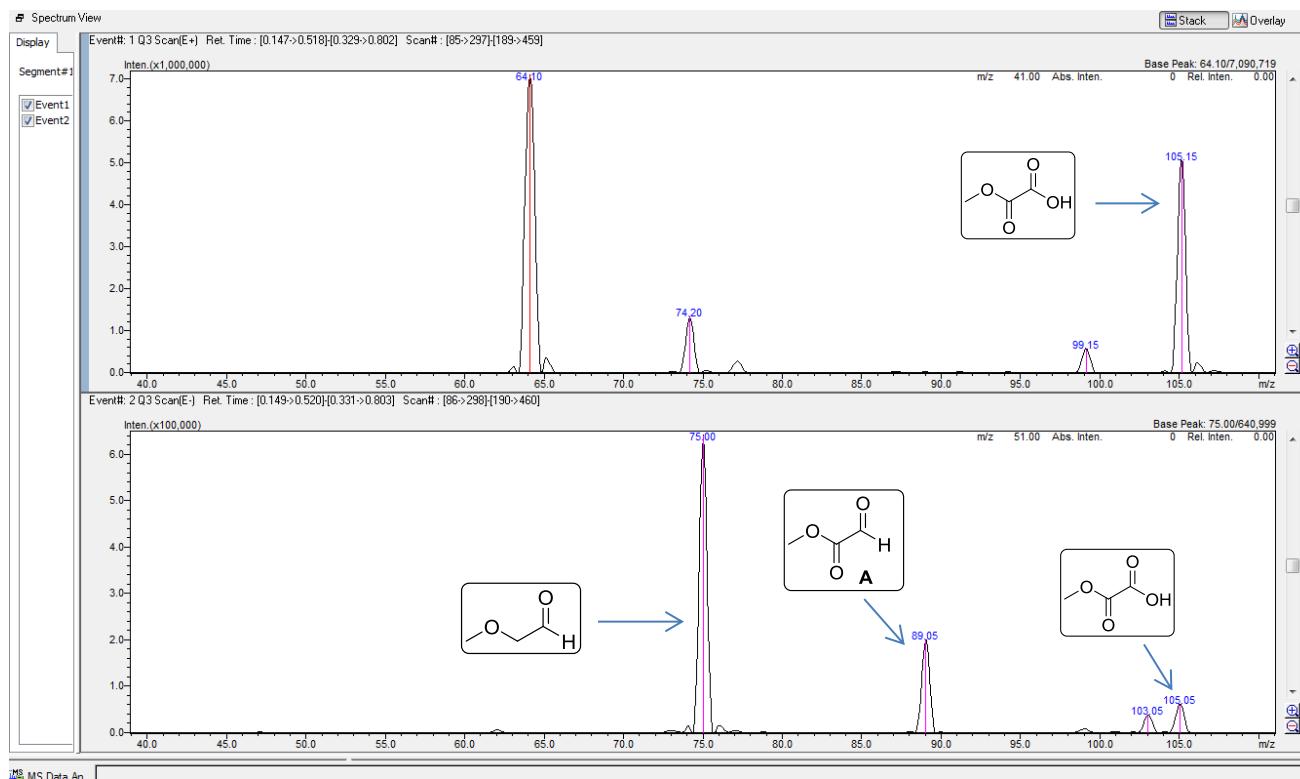

**Fig S<sub>1</sub>:** LC-MS observed fragments of 2-methoxyacetaldehyde, methyl 2-oxoacetate, 2-methoxy-2-oxoacetic acid from 2-Methoxyethanol.

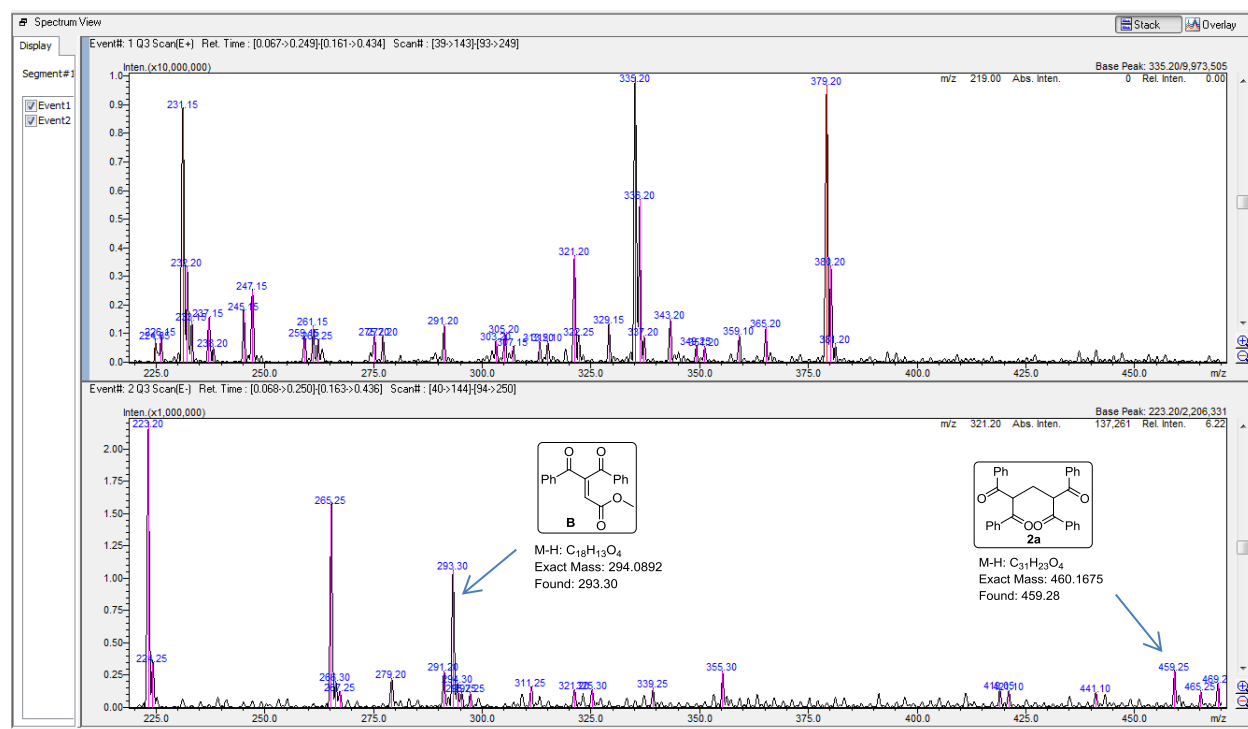

**Fig S2: LC-MS observed fragments of intermediate (C) and product 2a.**

### (3) Experimental Procedures

#### (i) Preparation of 1, 3-dicarbonyl derivatives (**S<sub>2</sub>**)

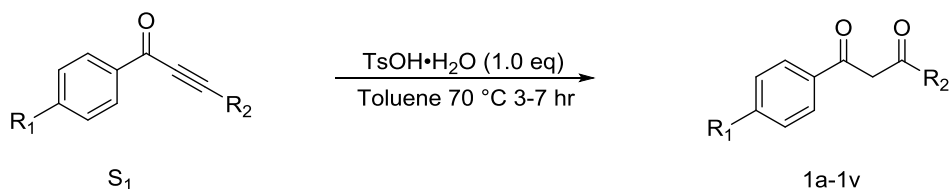

An oven-dried sealed tube was charged alkynones<sup>1</sup> **S<sub>1</sub>** (0.5 mmol), Toluene (3 ml), and TsOH·H<sub>2</sub>O (1.0 equiv) and allowed to stir at 70 °C until the completion of the reaction (3-7 h) by TLC. After completion, the reaction mixture was cooled to room temperature and diluted with 10.0 mL of water. The water layer was extracted with (3X10 mL) of ethyl acetate, and the combined ethyl acetate layer was given brine wash (1X10 mL). The final ethyl acetate layer was dried over sodium sulfate and concentrated under reduced pressure to get the crude compound. The obtained crude was purified using column chromatography by eluting (Hexane/EtOAc = 99/1) to afford pure 1,3-dicarbonyl compounds **1a-1v** in 60-80% yields.

#### (ii) General Experimental Procedure for the Synthesis methylene-bridged *bis*-1, 3-Dicarbonyl compounds with 2-methoxyethanol as “CH<sub>2</sub>” Source

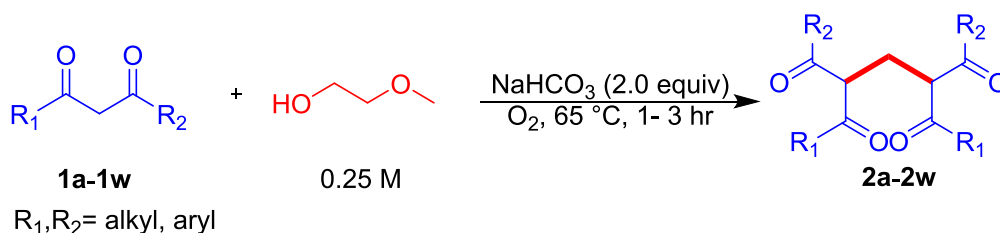

To an oven-dried sealed tube was charged with 1,3-dicarbonyl compounds **1a-1w** (0.2 mmol), 2-methoxyethanol (0.25 M), and NaHCO<sub>3</sub> (2.0 equiv), and allowed to stir at 65 °C under O<sub>2</sub> until the completion of the reaction by TLC. After completion, the reaction mixture was cooled to room temperature and diluted with 10.0 mL of water. The water layer was extracted with (3X10 mL) of ethyl acetate. The combined ethyl acetate layer was given brine wash (1X10 mL). The final ethyl acetate layer was dried over sodium sulfate and concentrated under reduced pressure to get the crude compound. The obtained crude was purified using column chromatography by eluting from (Hex/EA = 9/1) to afford pure methylene-bridged *bis*-1,3-dicarbonyl compounds **2a-2w** in 51 - 94% yields.

**(iii) General Experimental Procedure for the Synthesis of tetra-substituted pyridine with 2-methoxyethanol as “CH<sub>2</sub>” Source and NH<sub>4</sub>OAc as “N” source**

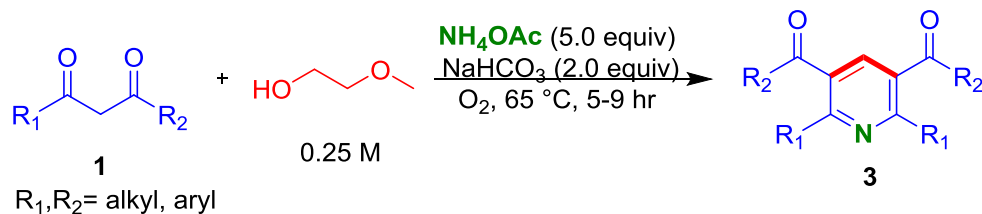

To an oven-dried sealed tube was charged with 1,3-dicarbonyl compounds **1a**, **1b**, **1d**, **1o**, **1p**, **1q**, **1r**, **1t**, **1w** (0.20 mmol), 2-methoxyethanol (0.25 M), NaHCO<sub>3</sub> (2.0 equiv), and NH<sub>4</sub>OAc (5.0 equiv) allowed to stir at 65 °C until the completion of the reaction (5-9 h) by TLC. After completion, the reaction mixture was cooled to room temperature and diluted with 5.0 mL of water. The water layer was extracted with (3X10 mL) of ethyl acetate, and the combined ethyl acetate layer was given brine wash (1X10 mL). The final ethyl acetate layer was dried over sodium sulfate and concentrated under reduced pressure to get the crude compound. The obtained crude product was purified using column chromatography by eluting from (Hex/EA = 9/1) to afford pure tetra-substituted pyridine derivatives **3a**, **3b**, **3d**, **3o**, **3p**, **3q**, **3r**, **3t**, **3w** in 45-83% yields.

**(iv) General Experimental Procedure for the Gram Scale Synthesis of 2,4-dibenzoyl-1,5-diphenylpentane-1,5-dione with 2-Methoxyethanol as “CH<sub>2</sub>” Source.**

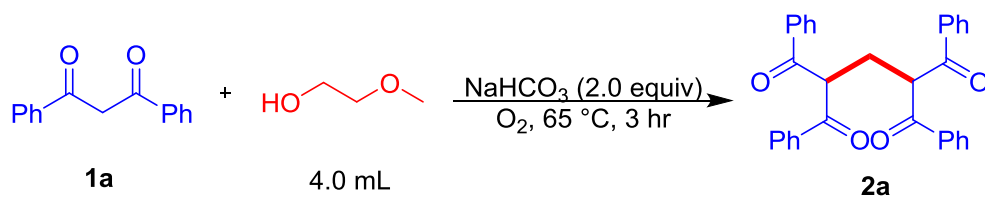

To an oven-dried sealed tube was charged with 1, 3-dicarbonyl compound **1a** (4.46 mmol), 2-methoxyethanol (5.0 mL), and NaHCO<sub>3</sub> (2.0 equiv), and allowed to stir at 65 °C under O<sub>2</sub> until the completion of the reaction by TLC. After completion, the reaction mixture was cooled to room temperature and diluted with 25 mL of water. The water layer was extracted with (3X20 mL) of ethyl acetate. The combined ethyl acetate layer was given brine wash (1X20 mL). The final ethyl acetate layer was dried over sodium sulfate and concentrated under reduced pressure to get the crude compound. The obtained crude was purified using column chromatography by eluting from (Hex/EA = 9/1) to afford pure 2, 4-dibenzoyl-1, 5-diphenylpentane-1, 5-dione **2a** in 62% yields.

#### (4) Spectral Characterization

**2,4-dibenzoyl-1,5-diphenylpentane-1,5-dione (2a)<sup>2</sup>:** Following the general procedure, a 15 mL reaction tube

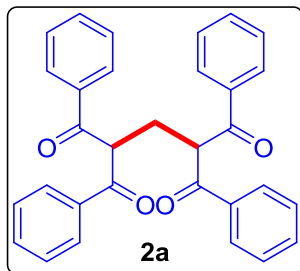

was charged with 1,3-diphenylpropane-1,3-dione (**1a**) (45 mg, 0.2 mmol), 2-methoxyethanol (0.25 M), NaHCO<sub>3</sub> (2.0 equiv) and allowed to stir at 65 °C under O<sub>2</sub> until the completion of reaction by TLC. After completion, the reaction mixture was cooled to room temperature and diluted with 10 mL of water. The water layer was extracted with (3X10 mL) of ethyl acetate and the combined ethyl acetate layer was given brine wash (1X10 mL). The final ethyl acetate layer was dried over sodium sulfate and concentrated under reduced pressure to get the crude compound. The obtained crude was purified using column chromatography by eluting from (Hex/EA = 9/1) to afford the corresponding 2,4-dibenzoyl-1,5-diphenylpentane-1,5-dione (**2b**) as a yellow solid (43 mg, yield = 94 %); Mp. 169-170 °C; <sup>1</sup>H NMR (400 MHz, CDCl<sub>3</sub>) δ 8.14-8.12 (m, 8H), 7.59 (t, *J* = 7.6 Hz, 4H), 7.49 (t, *J* = 8.0 Hz, 8H), 5.74 (t, *J* = 7.2 Hz, 2H), 2.76 (t, *J* = 6.8 Hz, 2H); <sup>13</sup>C NMR (100 MHz, CDCl<sub>3</sub>) δ 196.57, 135.40, 133.87, 129.02, 128.91, 128.80, 128.70, 53.97, 28.91.

**2,4-bis(4-methylbenzoyl)-1,5-di-*p*-tolylpentane-1,5-dione (2b)<sup>2</sup>:** Following the general procedure, a 15 mL

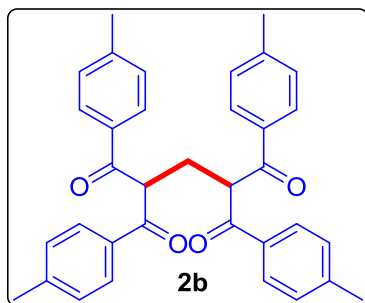

reaction tube was charged with 1,3-di-*p*-tolylpropane-1,3-dione (**1b**) (50 mg, 0.2 mmol), 2-methoxyethanol (0.25 M), NaHCO<sub>3</sub> (2.0 equiv) and allowed to stir at 65 °C under O<sub>2</sub> until the completion of reaction by TLC. After completion, the reaction mixture was cooled to room temperature and diluted with 10 mL of water. The water layer was extracted with (3X10 mL) of ethyl acetate and the combined ethyl acetate layer was given brine wash (1X10 mL). The final ethyl

acetate layer was dried over sodium sulfate and concentrated under reduced pressure to get the crude compound. The obtained crude was purified using column chromatography by eluting from (Hex/EA = 9/1) to afford the corresponding 2,4-bis(4-methylbenzoyl)-1,5-di-*p*-tolylpentane-1,5-dione (**2b**) as a white solid (46 mg, yield = 90%); Mp. 195-196.3 °C; <sup>1</sup>H NMR (400 MHz, CDCl<sub>3</sub>) δ 8.33-8.00 (m, 8H), 7.27-7.24 (m, 8H), 5.66 (t, *J* = 6.8 Hz, 2H), 2.70 (t, *J* = 6.8 Hz, 2H), 2.38 (s, 12H); <sup>13</sup>C NMR (100 MHz, CDCl<sub>3</sub>) δ 196.32, 144.69, 133.10, 129.64, 128.92, 53.89, 29.07, 21.68.

**2,4-bis(4-methoxybenzoyl)-1,5-bis(4-methoxyphenyl)pentane-1,5-dione (2c):** Following the general

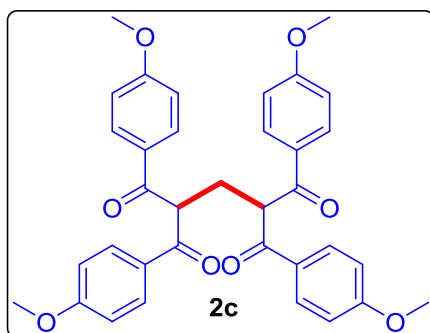

procedure, a 15 mL reaction tube was charged with 1,3-bis(4-methoxyphenyl)propane-1,3-dione (**1c**) (57 mg, 0.2 mmol), 2-methoxyethanol (0.25 M), NaHCO<sub>3</sub> (2.0 equiv) and allowed to stir at 65 °C under O<sub>2</sub> until the completion of reaction by TLC. After completion, the reaction mixture was cooled to room temperature and diluted with 10 mL of

water. The water layer was extracted with (3X10 mL) of ethyl acetate and the combined ethyl acetate layer was given brine wash (1X10 mL). The final ethyl acetate layer was dried over sodium sulfate and concentrated under reduced pressure to get the crude compound. The obtained crude was purified using column chromatography by eluting from (Hex/EA = 9/1) to afford the corresponding 2,4-*bis*(4-methoxybenzoyl)-1,5-*bis*(4-methoxyphenyl)pentane-1,5-dione (**2c**) as a white solid (52 mg, yield = 89%); Mp. 170.1-172 °C; <sup>1</sup>H NMR (400 MHz, CDCl<sub>3</sub>) δ 8.13-8.10 (m, 8H), 6.96-6.92 (m, 8H), 5.61 (t, *J* = 6.8 Hz, 2H), 3.85 (s, 12H), 2.70 (t, *J* = 6.8 Hz, 2H); <sup>13</sup>C NMR (100 MHz, CDCl<sub>3</sub>) δ 195.32, 163.95, 131.15, 128.61, 114.13, 55.49, 53.68, 29.28. HRMS (ESI) Calc' d for C<sub>35</sub> H<sub>32</sub> O<sub>8</sub> Na [M + Na]<sup>+</sup>: 603.1995; found: 603.1994.

**(2*R*,4*S*)-2,4-dibenzoyl-1,5-di-*p*-tolylpentane-1,5-dione (**2d**)**<sup>2</sup>: Following the general procedure, a 15 mL

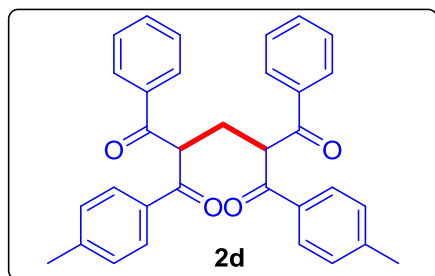

reaction tube was charged with 1-phenyl-3-(*p*-tolyl)propane-1,3-dione (**1d**) (48 mg, 0.2 mmol), 2-methoxyethanol (0.25 M), NaHCO<sub>3</sub> (2.0 equiv) and allowed to stir at 65 °C under O<sub>2</sub> until the completion of reaction by TLC. After completion, the reaction mixture was cooled to room temperature and diluted with 10 mL of water. The water layer was extracted with (3X10 mL) of ethyl acetate and the combined ethyl acetate layer was given brine wash

(1X10 mL). The final ethyl acetate layer was dried over sodium sulfate and concentrated under reduced pressure to get the crude compound. The obtained crude was purified using column chromatography by eluting from (Hex/EA = 9/1) to afford the corresponding (2*R*,4*S*)-2,4-dibenzoyl-1,5-di-*p*-tolylpentane-1,5-dione (**2d**) as a yellow liquid (41 mg, yield = 83%); The ratio of the two diastereomers is 8:1; <sup>1</sup>H NMR (400 MHz, CDCl<sub>3</sub>) δ 8.13-7.97 (m, 8H), 7.58-7.44 (m, 6H), 7.28-7.25 (m, 4H), 5.70 (t, *J* = 6.8 Hz, 2H), 2.73 (t, *J* = 7.2 Hz, 2H), 2.39 (s, 6H); <sup>13</sup>C NMR (100 MHz, CDCl<sub>3</sub>) δ 196.66, 196.64, 196.18, 196.16, 144.83, 135.53, 135.50, 133.73, 132.98, 132.95, 129.69, 128.94, 128.83, 128.76, 128.74, 53.92, 28.98, 21.67.

**(2*R*,4*S*)-2,4-dibenzoyl-1,5-*bis*(4-ethylphenyl)pentane-1,5-dione (**2e**)**: Following the general procedure, a 15

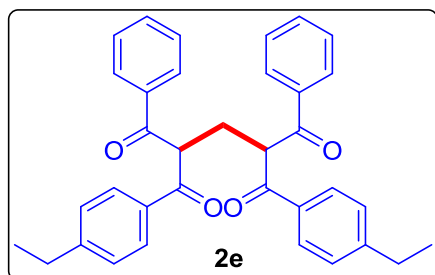

mL reaction tube was charged with 1-(4-ethylphenyl)-3-phenylpropane-1,3-dione (**1e**) (50 mg, 0.2 mmol), 2-methoxyethanol (0.25 M), NaHCO<sub>3</sub> (2.0 equiv) and allowed to stir at 65 °C under O<sub>2</sub> until the completion of reaction by TLC. After completion, the reaction mixture was cooled to room temperature and diluted with 10 mL of water. The water layer was extracted with (3X10 mL) of ethyl acetate and the combined ethyl acetate

layer was given brine wash (1X10 mL). The final ethyl acetate layer was dried over sodium sulfate and concentrated under reduced pressure to get the crude compound. The obtained crude was purified using column chromatography by eluting from (Hex/EA = 9/1) to afford the corresponding (2*R*,4*S*)-2,4-dibenzoyl-1,5-di-*p*-tolylpentane-1,5-dione (**2e**) as a yellow liquid (42 mg, yield = 81%); The ratio of the two diastereomers is 6:1; <sup>1</sup>H NMR (400 MHz, CDCl<sub>3</sub>) δ 8.13 (ddd, *J* = 6.8, 3.6, 2.4 Hz, 4H), 8.07-8.04 (m, 5H), 7.59-7.55 (m, 2H), 7.49-



7.45 (m, 5H), 7.31-7.27 (m, 5H), 5.71 (t,  $J = 7.2$  Hz, 2H), 2.75-2.66 (m, 8H), 1.24 (td,  $J = 7.6, 1.2$  Hz, 9H);  $^{13}\text{C}$  NMR (100 MHz,  $\text{CDCl}_3$ )  $\delta$  196.70, 196.20, 150.95, 135.54, 135.52, 133.74, 133.48, 133.17, 133.14, 129.07, 129.06, 128.96, 128.85, 128.79, 128.68, 128.53, 128.42, 128.22, 128.09, 54.94, 53.94, 35.94, 29.00, 28.96, 23.73, 15.04. HRMS (ESI) Calc'd for  $\text{C}_{35}\text{H}_{32}\text{O}_4\text{Na}$   $[\text{M} + \text{Na}]^+$ : 539.2198; found: 539.2200.

**2,4-bis(4-methoxybenzoyl)-1,5-bis(4-methoxyphenyl)pentane-1,5-dione (2f)**<sup>2</sup>: Following the general

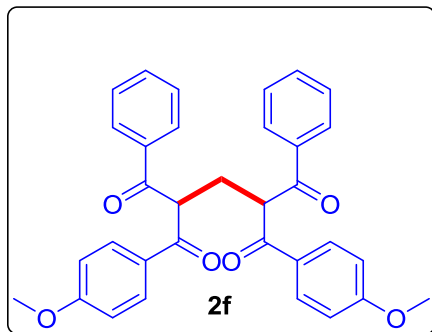

procedure, a 15 mL reaction tube was charged with 1,3-bis(4-methoxyphenyl)propane-1,3-dione (**1f**) (51 mg, 0.2 mmol), 2-methoxyethanol (0.25 M),  $\text{NaHCO}_3$  (2.0 equiv) and allowed to stir at 65 °C under  $\text{O}_2$  until the completion of reaction by TLC. After completion, the reaction mixture was cooled to room temperature and diluted with 10 mL of water. The water layer was extracted with (3X10 mL) of ethyl acetate and the combined ethyl acetate layer was given brine wash (1X10 mL). The

final ethyl acetate layer was dried over sodium sulfate and concentrated under reduced pressure to get the crude compound. The obtained crude was purified using column chromatography by eluting from (Hex/EA = 9/1) to afford the corresponding 2,4-bis(4-methoxybenzoyl)-1,5-bis(4-methoxyphenyl)pentane-1,5-dione (**2f**) as a yellow solid (41 mg, yield = 78%); Mp. 151-152 °C;  $^1\text{H}$  NMR (400 MHz,  $\text{CDCl}_3$ )  $\delta$  8.21-8.19 (m, 2H), 8.14 - 8.07 (m, 6H), 7.56 (ddd,  $J = 7.2, 3.2, 2.0$  Hz, 2H), 7.46 (dt,  $J = 12.8, 8.0$  Hz, 4H), 6.99-6.93 (m, 4H), 5.67 (t,  $J = 6.8$  Hz, 2H), 3.87 (s,  $J = 8.8$  Hz, 6H), 2.73 (t,  $J = 7.2$  Hz, 2H);  $^{13}\text{C}$  NMR (100 MHz,  $\text{CDCl}_3$ )  $\delta$  196.77, 195.16, 195.09, 164.14, 164.07, 135.73, 135.57, 133.72, 133.65, 131.38, 131.22, 128.96, 128.91, 128.77, 128.63, 128.50, 128.32, 114.25, 114.20, 55.54, 55.52, 53.87, 53.84, 29.14.

**(2R,4S)-2,4-dibenzoyl-1,5-bis(4-chlorophenyl)pentane-1,5-dione (2g)**<sup>3</sup>: Following the general procedure, a

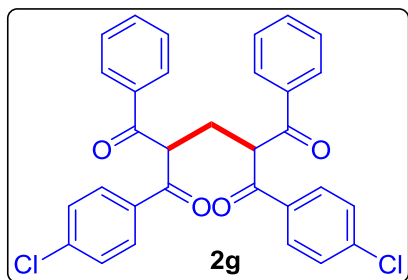

15 mL reaction tube was charged with 1-(4-chlorophenyl)-3-phenylpropane-1,3-dione (**1g**) (52 mg, 0.2 mmol), 2-methoxyethanol (0.25 M),  $\text{NaHCO}_3$  (2.0 equiv) and allowed to stir at 65 °C under  $\text{O}_2$  until the completion of reaction by TLC. After completion, the reaction mixture was cooled to room temperature and diluted with 10 mL of water. The water layer was extracted with (3X10 mL) of ethyl acetate and the combined ethyl acetate layer was

given brine wash (1X10 mL). The final ethyl acetate layer was dried over sodium sulfate and concentrated under reduced pressure to get the crude compound. The obtained crude was purified using column chromatography by eluting from (Hex/EA = 9/1) to afford the corresponding (2R,4S)-2,4-dibenzoyl-1,5-bis(4-chlorophenyl)pentane-1,5-dione (**2g**) as a white solid (40 mg, yield = 76%); Mp. 134.8-135.6 °C;  $^1\text{H}$  NMR (400 MHz,  $\text{CDCl}_3$ )  $\delta$  8.12-8.05 (m, 8H), 7.61 (t,  $J = 7.6$  Hz, 2H), 7.52-7.45 (m, 8H), 5.64 (t,  $J = 7.2$  Hz, 2H), 2.72 (tt,  $J = 14.0, 6.8$  Hz, 2H);  $^{13}\text{C}$  NMR (100 MHz,  $\text{CDCl}_3$ )  $\delta$  196.28, 195.43, 140.54, 135.25, 134.07, 133.72, 130.25, 130.18, 129.43, 129.40, 129.12, 129.09, 128.79, 128.73, 53.97, 28.78.

**(2*R*, 4*S*)-2,4-dibenzoyl-1,5-bis(4-fluorophenyl)pentane-1,5-dione (2h)**<sup>4</sup>: Following the general procedure, a

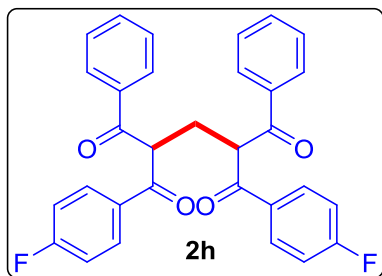

15 mL reaction tube was charged with 1-(4-fluorophenyl)-3-phenylpropane-1,3-dione (**1h**) (48 mg, 0.2 mmol), 2-methoxyethanol (0.25 M), NaHCO<sub>3</sub> (2.0 equiv) and allowed to stir at 65 °C under O<sub>2</sub> until the completion of reaction by TLC. After completion, the reaction mixture was cooled to room temperature and diluted with 10 mL of water. The water layer was extracted with (3X10 mL) of ethyl acetate and the combined ethyl acetate layer was given brine wash

(1X10 mL). The final ethyl acetate layer was dried over sodium sulfate and concentrated under reduced pressure to get the crude compound. The obtained crude was purified using column chromatography by eluting from (Hex/EA = 9/1) to afford the corresponding (2*R*,4*S*)-2,4-dibenzoyl-1,5-bis(4-fluorophenyl)pentane-1,5-dione (**2h**) as a white solid (38 mg, yield = 76%); Mp. 171.5-172.2 °C; <sup>1</sup>H NMR (400 MHz, CDCl<sub>3</sub>) δ 8.24 - 8.06 (m, 8H), 7.62-7.56 (m, 2H), 7.51 - 7.45 (m, 4H), 7.20-7.13 (m, 4H), 5.66 (t, *J* = 7.2 Hz, 2H), 2.79-2.66 (m, 2H); <sup>13</sup>C NMR (100 MHz, CDCl<sub>3</sub>) δ 196.37, 195.03, 167.51, 167.46, 164.96 (d, *J<sub>F</sub>* = 254 Hz), 164.91, 135.38, 135.28 (d, *J<sub>F</sub>* = 10 Hz), 134.02, 133.98, 131.83, 131.80, 131.72, 131.62, 131.60, 131.51, 129.09, 129.05, 128.78, 128.68, 116.38 (d, *J<sub>F</sub>* = 21.8 Hz), 116.34, 116.16, 116.12, 53.95, 28.86.

**(2*R*,4*S*)-2,4-bis(4-acetylbenzoyl)-1,5-diphenylpentane-1,5-dione (2i)**: Following the general procedure, a 15

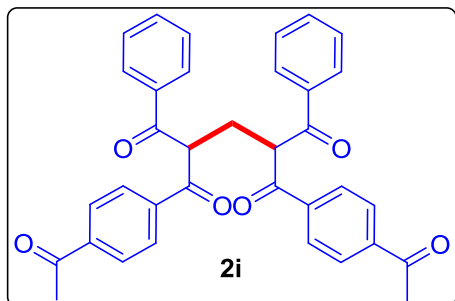

mL reaction tube was charged with 1-(4-acetylphenyl)-3-phenylpropane-1,3-dione (**1i**) (53 mg, 0.2 mmol), 2-methoxyethanol (0.25 M), NaHCO<sub>3</sub> (2.0 equiv) and allowed to stir at 65 °C under O<sub>2</sub> until the completion of reaction by TLC. After completion, the reaction mixture was cooled to room temperature and diluted with 10 mL of water. The water layer was extracted with (3X10 mL) of ethyl acetate and the combined ethyl acetate

layer was given brine wash (1X10 mL). The final ethyl acetate layer was dried over sodium sulfate and concentrated under reduced pressure to get the crude compound. The obtained crude was purified using column chromatography by eluting from (Hex/EA = 9/1) to afford the corresponding (2*R*,4*S*)-2,4-bis(4-acetylbenzoyl)-1,5-diphenylpentane-1,5-dione (**2i**) as a white solid (45 mg, yield = 82%); Mp. 136.1-137.2 °C; <sup>1</sup>H NMR (400 MHz, CDCl<sub>3</sub>) δ 8.21 (dd, *J* = 8.4, 6.4 Hz, 4H), 8.15-8.10 (m, 4H), 8.06 - 8.03 (m, 4H), 7.64-7.60 (m, 2H), 7.53 - 7.49 (m, 4H), 5.73 (dd, *J* = 8.8, 6.8 Hz, 2H), 2.76 (t, *J* = 6.8 Hz, 2H), 2.63 (s, 6H); <sup>13</sup>C NMR (100 MHz, CDCl<sub>3</sub>) δ 197.24, 196.24, 196.10, 140.68, 138.53, 135.12, 134.19, 129.16, 128.96, 128.84, 54.24, 28.69, 26.91. HRMS (ESI) Calc'd for C<sub>35</sub> H<sub>28</sub> O<sub>6</sub> Na [M + Na]<sup>+</sup>: 567.1784; found: 567.1780

**Dimethyl 4, 4'-((2*R*, 4*S*)-2, 4-dibenzoylpentanedioyl) dibenzoate (**2j**):** Following the general procedure, a 15

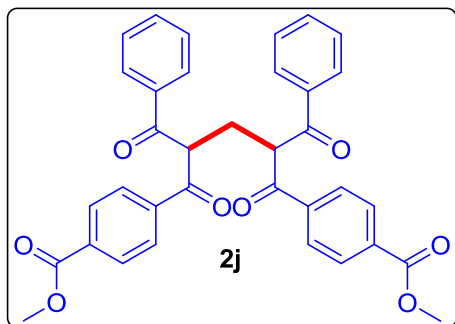

mL reaction tube was charged with methyl 4-(3-oxo-3-phenylpropanoyl) benzoate (**1j**) (56 mg, 0.2 mmol), 2-methoxyethanol (0.25 M), NaHCO<sub>3</sub> (2.0 equiv) and allowed to stir at 65 °C under O<sub>2</sub> until the completion of reaction by TLC. After completion, the reaction mixture was cooled to room temperature and diluted with 10 mL of water. The water layer was extracted with (3X10 mL) of ethyl acetate and the combined ethyl acetate

layer was given brine wash (1X10 mL). The final ethyl acetate layer was dried over sodium sulfate and concentrated under reduced pressure to get the crude compound. The obtained crude was purified using column chromatography by eluting from (Hex/EA = 9/1) to afford the corresponding dimethyl 4,4'-((2*R*,4*S*)-2,4-dibenzoylpentanedioyl)dibenzoate (**2j**) as a yellow solid (49 mg, yield = 85%); Mp. 152-153.4 °C; <sup>1</sup>H NMR (400 MHz, CDCl<sub>3</sub>) δ 8.19 - 8.10 (m, 12H), 7.62 (t, *J* = 6.8 Hz, 2H), 7.51 (t, *J* = 8.0 Hz, 4H), 5.72 (t, *J* = 6.8 Hz, 2H), 3.93 (s, 6H), 2.76 (t, *J* = 6.8 Hz, 2H); <sup>13</sup>C NMR (100 MHz, CDCl<sub>3</sub>) δ 196.23, 196.12, 165.95, 138.63, 135.12, 134.51, 134.15, 130.18, 129.14, 128.85, 128.80, 128.67, 128.62, 54.22, 52.51, 28.70. HRMS (ESI) Calc'd for C<sub>35</sub> H<sub>28</sub> O<sub>8</sub> Na [M + Na]<sup>+</sup>: 599.1682; found: 599.1680.

**(2*R*,4*S*)-2,4-bis(4-ethylbenzoyl)-1,5-di-*p*-tolylpentane-1,5-dione (**2k**):** Following the general procedure, a 15

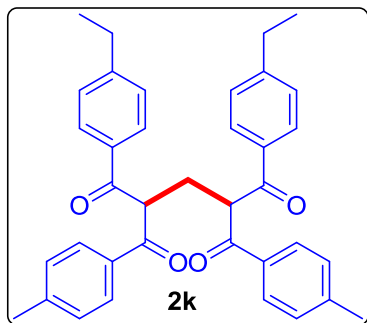

mL reaction tube was charged with 1-(4-ethylphenyl)-3-(*p*-tolyl)propane-1,3-dione (**1k**) (53 mg, 0.2 mmol), 2-methoxyethanol (0.25 M), NaHCO<sub>3</sub> (2.0 equiv) and allowed to stir at 65 °C under O<sub>2</sub> until the completion of reaction by TLC. After completion, the reaction mixture was cooled to room temperature and diluted with 10 mL of water. The water layer was extracted with (3X10 mL) of ethyl acetate and the combined ethyl acetate layer was given brine wash (1X10

mL). The final ethyl acetate layer was dried over sodium sulfate and concentrated under reduced pressure to get the crude compound. The obtained crude was purified using column chromatography by eluting from (Hex/EA = 9/1) to afford the corresponding (2*R*,4*S*)-2,4-bis(4-ethylbenzoyl)-1,5-di-*p*-tolylpentane-1,5-dione (**2k**) as a white solid (43 mg, yield = 79%); Mp. 166-167 °C; <sup>1</sup>H NMR (400 MHz, CDCl<sub>3</sub>) δ 8.03 (td, *J* = 8.4, 2.8 Hz, 8H), 7.29-7.25 (m, 9H), 5.67 (t, *J* = 6.8 Hz, 2H), 2.72-2.67 (m, 6H), 2.39 (s, 6H); <sup>13</sup>C NMR (100 MHz, CDCl<sub>3</sub>) δ 196.36, 196.33, 196.31, 150.80, 144.70, 133.27, 133.10, 129.65, 129.03, 128.94, 128.47, 53.90, 29.08, 28.96, 21.69, 15.05. HRMS (ESI) Calc'd for C<sub>37</sub> H<sub>36</sub> O<sub>4</sub> Na [M + Na]<sup>+</sup>: 567.2511; found: 567.2511.

**(2R, 4S)-2,4-bis(4-methoxybenzoyl)-1,5-di-*p*-tolylpentane-1,5-dione (2l)**<sup>2</sup>: Following the general procedure, a

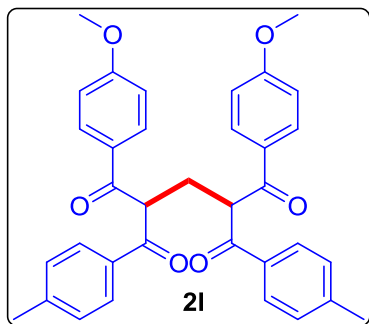

15 mL reaction tube was charged with 1-(4-methoxyphenyl)-3-(*p*-tolyl)propane-1,3-dione (**1l**) (54 mg, 0.2 mmol), 2-methoxyethanol (0.25 M), NaHCO<sub>3</sub> (2.0 equiv) and allowed to stir at 65 °C under O<sub>2</sub> until the completion of reaction by TLC. After completion, the reaction mixture was cooled to room temperature and diluted with 10 mL of water. The water layer was extracted with (3X10 mL) of ethyl acetate and the combined ethyl acetate layer was given brine wash

(1X10 mL). The final ethyl acetate layer was dried over sodium sulfate and concentrated under reduced pressure to get the crude compound. The obtained crude was purified using column chromatography by eluting from (Hex/EA = 9/1) to afford the corresponding (2R,4S)-2,4-bis(4-methoxybenzoyl)-1,5-di-*p*-tolylpentane-1,5-dione (**2l**) as a white solid (41 mg, yield = 74%); Mp. 87.9-88.4 °C; <sup>1</sup>H NMR (400 MHz, CDCl<sub>3</sub>) δ 8.18- 8.16 (m, 2H), 8.12-8.10 (m, 2H), 8.03 (d, *J* = 8.4 Hz, 2H), 7.96 (d, *J* = 8.4 Hz, 2H), 7.27-7.22 (m, 5H), 6.98-6.92 (m, 4H), 5.63 (t, *J* = 7.2 Hz, 2H), 3.87 (s, 3H), 3.85 (s, 3H), 2.70 (t, *J* = 7.2 Hz, 2H), 2.38 (d, *J* = 6.8 Hz, 6H); <sup>13</sup>C NMR (100 MHz, CDCl<sub>3</sub>) δ 196.41, 195.28, 195.24, 164.04, 163.98, 144.66, 144.60, 133.28, 133.14, 131.32, 131.19, 129.64, 129.60, 128.91, 128.79, 128.60, 128.45, 114.18, 114.15, 109.98, 55.51, 53.80, 29.19, 21.69, 21.66.

**(2R, 4S)-2,4-bis(4-chlorobenzoyl)-1,5-di-*p*-tolylpentane-1,5-dione (2m)**: Following the general procedure, a

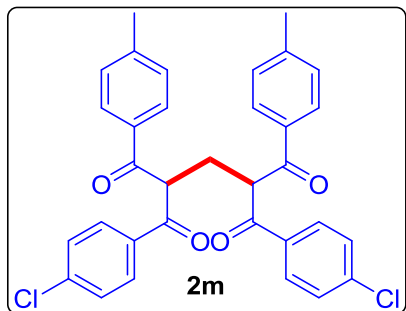

15 mL reaction tube was charged with 1-(4-chlorophenyl)-3-(*p*-tolyl)propane-1,3-dione (**1m**) (55 mg, 0.2 mmol), 2-methoxyethanol (0.25 M), NaHCO<sub>3</sub> (2.0 equiv) and allowed to stir at 65 °C under O<sub>2</sub> until the completion of reaction by TLC. After completion, the reaction mixture was cooled to room temperature and diluted with 10 mL of water. The water layer was extracted with (3X10 mL) of ethyl acetate and the combined ethyl acetate layer was

given brine wash (1X10 mL). The final ethyl acetate layer was dried over sodium sulfate and concentrated under reduced pressure to get the crude compound. The obtained crude was purified using column chromatography by eluting from (Hex/EA = 9/1) to afford the corresponding (2R,4S)-2,4-bis(4-chlorobenzoyl)-1,5-di-*p*-tolylpentane-1,5-dione (**2m**) as a white solid (46 mg, yield = 83%); Mp. 165-166.3 °C; <sup>1</sup>H NMR (400 MHz, CDCl<sub>3</sub>) δ 8.07 - 8.04 (m, 4H), 7.99 (dd, *J* = 8.4, 6.4 Hz, 4H), 7.4 -7.43 (m, 4H), 7.28 (dd, *J* = 8.0, 3.2 Hz, 4H), 5.60 (dd, *J* = 6.8, 6.0 Hz, 2H), 2.72-2.65 (m, 2H), 2.40 (d, *J* = 1.6 Hz, 6H); <sup>13</sup>C NMR (100 MHz, CDCl<sub>3</sub>) δ 195.91, 195.88, 195.55, 145.12, 145.10, 140.43, 133.81, 133.79, 132.83, 132.81, 130.20, 130.16, 129.79, 129.77, 129.35, 129.33, 128.91, 128.88, 53.90, 28.85, 21.71. HRMS (ESI) Calc' d for C<sub>33</sub> H<sub>26</sub> O<sub>4</sub> Na Cl [M + Na]<sup>+</sup>: 579.1106; found: 579.1107.

**(2*R*,4*S*)-2,4-bis(4-chlorobenzoyl)-1,5-bis(4-methoxyphenyl)pentane-1,5-dione (2n)**: Following the general

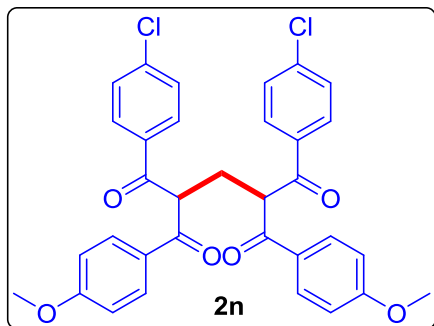

procedure, a 15 mL reaction tube was charged with 1-(4-chlorophenyl)-3-(4-methoxyphenyl)propane-1,3-dione (**1n**) (58 mg, 0.2 mmol), 2-methoxyethanol (0.25 M), NaHCO<sub>3</sub> (2.0 equiv) and allowed to stir at 65 °C under O<sub>2</sub> until the completion of reaction by TLC. After completion, the reaction mixture was cooled to room temperature and diluted with 10 mL of water. The water layer was extracted with (3X10 mL) of ethyl acetate and

the combined ethyl acetate layer was given brine wash (1X10 mL). The final ethyl acetate layer was dried over sodium sulfate and concentrated under reduced pressure to get the crude compound. The obtained crude was purified using column chromatography by eluting from (Hex/EA = 9/1) to afford the corresponding (2*R*,4*S*)-2,4-bis(4-chlorobenzoyl)-1,5-bis(4-methoxyphenyl)pentane-1,5-dione (**2n**) as a yellow solid (47 mg, yield = 80%); Mp. 158-159 °C; <sup>1</sup>H NMR (400 MHz, CDCl<sub>3</sub>) δ 8.16-8.02 (m, 8H), 7.45 (dd, *J* = 8.8, 6.8 Hz, 4H), 6.97 (dd, *J* = 8.8, 7.6 Hz, 4H), 5.58 (td, *J* = 6.8, 2.0 Hz, 2H), 3.87 (s, 6H), 2.72-2.67 (m, 2H); <sup>13</sup>C NMR (100 MHz, CDCl<sub>3</sub>) δ 195.62, 194.81, 194.74, 164.25, 164.21, 140.33, 140.29, 133.96, 133.86, 131.28, 131.19, 130.12, 130.05, 129.30, 129.28, 128.27, 128.14, 114.30, 114.28, 55.55, 53.84, 53.80, 28.98. HRMS (ESI) Calc' d for C<sub>33</sub> H<sub>26</sub> O<sub>6</sub> Na Cl<sub>2</sub> [M + Na]<sup>+</sup>: 611.3902; found: 611.3900.

**diethyl (2*R*,4*S*)-2,4-dibenzoylpentanedioate (2o)**<sup>2</sup>: Following the general procedure, a 15 mL reaction tube

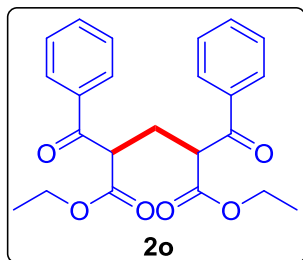

was charged with ethyl 3-oxo-3-phenylpropanoate (**1o**) (38 mg, 0.2 mmol), 2-methoxyethanol (0.25 M), NaHCO<sub>3</sub> (2.0 equiv) and allowed to stir at 65 °C under O<sub>2</sub> until the completion of reaction by TLC. After completion, the reaction mixture was cooled to room temperature and diluted with 10 mL of water. The water layer was extracted with (3X10 mL) of ethyl acetate and the combined ethyl acetate layer was

given brine wash (1X10 mL). The final ethyl acetate layer was dried over sodium sulfate and concentrated under reduced pressure to get the crude compound. The obtained crude was purified using column chromatography by eluting from (Hex/EA = 9/1) to afford the corresponding diethyl (2*R*,4*S*)-2,4-dibenzoylpentanedioate (**2o**) as a yellow solid (36 mg, yield = 90%); Mp. 88.1-89 °C; The ratio of the two diastereomers is 9:1; <sup>1</sup>H NMR (400 MHz, CDCl<sub>3</sub>) δ 8.05 (dt, *J* = 8.4, 2.0 Hz, 4H), 7.60-7.56 (m, 2H), 7.52-7.45 (m, 5H), 4.63 (dd, *J* = 7.4, 7.2 Hz, 2H), 4.26-4.18 (m, 4H), 2.56 (dd, *J* = 7.6, 7.2 Hz, 2H), 1.22 (t, *J* = 7.2 Hz, 6H); <sup>13</sup>C NMR (100 MHz, CDCl<sub>3</sub>) δ 195.13, 169.65, 135.37, 133.77, 128.88, 128.77, 61.64, 51.55, 51.29, 28.17, 13.98.

**Diethyl (2*R*, 4*S*)-2, 4-bis (4-methoxybenzoyl) pentanedioate (2p)**<sup>3</sup>: Following the general procedure, a 15 mL

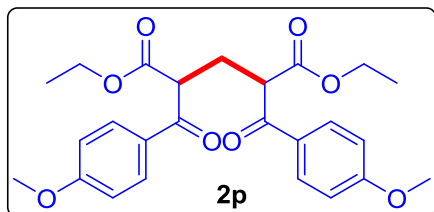

reaction tube was charged with ethyl 3-(4-methoxyphenyl)-3-oxopropanoate (**1p**) (44 mg, 0.2 mmol), 2-methoxyethanol (0.25 M),

NaHCO<sub>3</sub> (2.0 equiv) and allowed to stir at 65 °C under O<sub>2</sub> until the completion of reaction by TLC. After completion, the reaction mixture was cooled to room temperature and diluted with 10 mL of water. The water layer was extracted with (3X10 mL) of ethyl acetate and the combined ethyl acetate layer was given brine wash (1X10 mL). The final ethyl acetate layer was dried over sodium sulfate and concentrated under reduced pressure to get the crude compound. The obtained crude was purified using column chromatography by eluting from (Hex/EA = 9/1) to afford the corresponding diethyl (2*R*,4*S*)-2,4-*bis*(4-methoxybenzoyl)pentanedioate (**2p**) as a yellow solid (35 mg, yield = 76%); Mp. 89-90 °C; <sup>1</sup>H NMR (400 MHz, CDCl<sub>3</sub>) δ 8.05 - 8.02 (m, 4H), 6.96 - 6.92 (m, 4H), 4.56 (t, *J* = 7.2 Hz, 2H), 4.22 (dd, *J* = 6.8, 6.0 Hz, 4H), 3.88 (s, 6H), 2.52 (t, *J* = 7.2 Hz, 2H), 1.23 (t, *J* = 7.2 Hz, 6H); <sup>13</sup>C NMR (100 MHz, CDCl<sub>3</sub>) δ 193.70, 169.94, 164.02, 131.36, 131.26, 128.35, 113.95, 61.51, 55.49, 51.34, 28.57, 14.02.

(2*R*,4*S*)-2,4-dibenzoyl-1,5-di(thiophen-2-yl)pentane-1,5-dione (**2r**)<sup>5</sup>: Following the general procedure, a 15

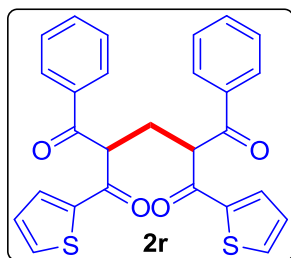

mL reaction tube was charged with 1-phenyl-3-(thiophen-2-yl)propane-1,3-dione (**1r**) (46 mg, 0.2 mmol), 2-methoxyethanol (0.25 M), NaHCO<sub>3</sub> (2.0 equiv) and allowed to stir at 65 °C under O<sub>2</sub> until the completion of reaction by TLC. After completion, the reaction mixture was cooled to room temperature and diluted with 10 mL of water.

The water layer was extracted with (3X10 mL) of ethyl acetate and the combined ethyl acetate layer was given brine wash (1X10 mL). The final ethyl acetate layer was dried over sodium sulfate and concentrated under reduced pressure to get the crude compound. The obtained crude was purified using column chromatography by eluting from (Hex/EA = 9/1) to afford the corresponding (2*R*,4*S*)-2,4-dibenzoyl-1,5-di(thiophen-2-yl)pentane-1,5-dione (**2r**) as a white solid (38 mg, yield = 81%); Mp. 165.5-166.9 °C; <sup>1</sup>H NMR (400 MHz, CDCl<sub>3</sub>) δ 8.15 - 8.09 (m, 4H), 8.07 (dd, *J* = 4.0, 1.6 Hz, 1H), 8.01 (dd, *J* = 4.0, 1.2 Hz, 1H), 7.68 (ddd, *J* = 6.0, 5.2, 1.2 Hz, 2H), 7.59 (ddd, *J* = 9.2, 7.6, 1.2 Hz, 2H), 7.49 (q, *J* = 8.0 Hz, 4H), 7.15 (ddd, *J* = 8.8, 5.2, 4.0 Hz, 2H), 5.54 (t, *J* = 6.8 Hz, 2H), 2.80 (t, *J* = 7.2 Hz, 2H); <sup>13</sup>C NMR (100 MHz, CDCl<sub>3</sub>) δ 195.89, 195.88, 189.00, 188.98, 142.85, 135.44, 135.42, 135.20, 133.93, 133.66, 133.63, 129.02, 128.78, 128.74, 128.67, 55.12, 55.10, 29.39.

(2*R*, 4*S*)-2,4-*bis* (5-acetylfuran-2-carbonyl)-1,5-diphenylpentane-1,5-dione (**2s**): Following the general

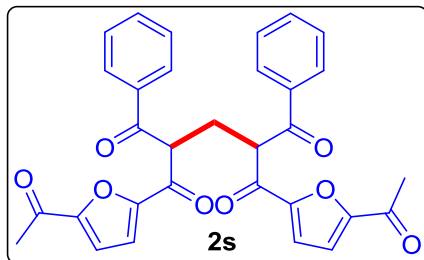

procedure, a 15 mL reaction tube was charged with 1-(5-acetylfuran-2-yl)-3-phenylpropane-1,3-dione (**1s**) (51 mg, 0.2 mmol), 2-methoxyethanol (0.25 M), NaHCO<sub>3</sub> (2.0 equiv) and allowed to stir at 65 °C under O<sub>2</sub> until the completion of reaction by TLC. After completion, the reaction mixture was cooled to room temperature and diluted with 10 mL of water. The water

layer was extracted with (3X10 mL) of ethyl acetate and the combined ethyl acetate layer was given brine wash (1X10 mL). The final ethyl acetate layer was dried over sodium sulfate and concentrated under reduced pressure to get the crude compound. The obtained crude was purified using column chromatography by eluting



from (Hex/EA = 9/1) to afford the corresponding (2*R*,4*S*)-2,4-*bis*(5-acetylfuran-2-carbonyl)-1,5-diphenylpentane-1,5-dione (**2s**) as a yellow solid (29 mg, yield = 56%); Mp. 76-77 °C; The ratio of the two diastereomers is 1.5:1; <sup>1</sup>H NMR (400 MHz, CDCl<sub>3</sub>) δ 8.32 (d, *J* = 7.2 Hz, 2H), 8.13 (d, *J* = 7.2 Hz, 1H), 7.67 - 7.45 (m, 8H), 7.31 (d, *J* = 4.0 Hz, 1H), 7.17 (dd, *J* = 16.0, 4.0 Hz, 2H), 5.57 (t, *J* = 6.4 Hz, 1H), 5.49 (t, *J* = 7.2 Hz, 1H), 2.78-2.67 (m, 2H), 2.27 (s, 2H), 2.11 (s, 4H); <sup>13</sup>C NMR (100 MHz, CDCl<sub>3</sub>) δ 196.08, 195.59, 187.49, 187.31, 185.60, 185.00, 154.24, 153.97, 152.01, 151.64, 135.47, 134.97, 134.36, 134.20, 129.18, 129.16, 129.10, 128.82, 119.04, 118.28, 116.73, 116.66, 54.28, 54.15, 27.51, 27.02, 25.99, 25.74. HRMS (ESI) Calc' d for C<sub>31</sub> H<sub>24</sub> O<sub>8</sub> Na [M + Na]<sup>+</sup>: 547.1369; found: 547.1367.

**(3*R*, 5*S*)-3,5-dibenzoylheptane-2,6-dione (2t)**<sup>2</sup>: Following the general procedure, a 15 mL reaction tube was

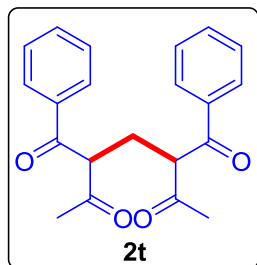

charged with 1-phenylbutane-1, 3-dione (**1t**) (32 mg, 0.2 mmol), 2-methoxyethanol (0.25 M), NaHCO<sub>3</sub> (2.0 equiv) and allowed to stir at 65 °C under O<sub>2</sub> until the completion of reaction by TLC. After completion, the reaction mixture was cooled to room temperature and diluted with 10 mL of water. The water layer was extracted with (3X10 mL) of ethyl acetate and the combined ethyl acetate layer was given brine wash (1X10 mL). The final

ethyl acetate layer was dried over sodium sulfate and concentrated under reduced pressure to get the crude compound. The obtained crude was purified using column chromatography by eluting from (Hex/EA = 9/1) to afford the corresponding (3*R*,5*S*)-3,5-dibenzoylheptane-2,6-dione (**2t**) as a yellow liquid (29 mg, yield = 86%); The ratio of the two diastereomers is 1.1:1; <sup>1</sup>H NMR (400 MHz, CDCl<sub>3</sub>) δ 8.04 (ddd, *J* = 8.4, 7.2, 5.2 Hz, 4H), 7.63 - 7.59 (m, 2H), 7.54 - 7.47 (m, 4H), 4.72 (t, *J* = 6.8 Hz, 1H), 4.64 (t, *J* = 7.2 Hz, 1H), 2.60-2.45 (m, 2H), 2.19 (s, 3H), 2.15 (s, 3H); <sup>13</sup>C NMR (100 MHz, CDCl<sub>3</sub>) δ 203.92, 203.36, 196.60, 196.37, 135.90, 135.58, 134.03, 129.01, 128.95, 128.89, 128.79, 59.33, 59.15, 29.40, 29.09, 27.38, 27.01.

**(2*R*,4*S*)-2,4-dibenzoyl-1,5-dicyclopentylpentane-1,5-dione (2u)**: Following the general procedure, a 15 mL

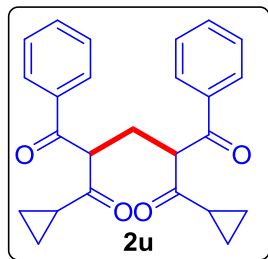

reaction tube was charged with 1-cyclopropyl-3-phenylpropane-1, 3-dione (**1u**) (38 mg, 0.2 mmol), 2-methoxyethanol (0.25 M), NaHCO<sub>3</sub> (2.0 equiv) and allowed to stir at 65 °C under O<sub>2</sub> until the completion of reaction by TLC. After completion, the reaction mixture was cooled to room temperature and diluted with 10 mL of water. The water layer was extracted with (3X10 mL) of ethyl acetate and the combined ethyl acetate

layer was given brine wash (1X10 mL). The final ethyl acetate layer was dried over sodium sulfate and concentrated under reduced pressure to get the crude compound. The obtained crude was purified using column chromatography by eluting from (Hex/EA = 9/1) to afford the corresponding (2*R*,4*S*)-2,4-dibenzoyl-1,5-dicyclopentylpentane-1,5-dione (**2u**) as a yellow liquid (35 mg, yield = 89%); <sup>1</sup>H NMR (400 MHz, CDCl<sub>3</sub>) δ 8.09-8.04 (m, 2H), 8.02-8.00 (m, 2H), 7.62-7.55 (m, 2H), 7.51-7.49 (m, 2H), 7.47-7.45 (m, 2H), 4.77 (dt, *J* = 4.8, 6.8 Hz, 2H), 2.70-2.62 (m, 2H), 2.04-1.99 (m, 2H), 1.13-1.04 (m, 3H), 1.99-1.80 (m, 6H); <sup>13</sup>C NMR (100 MHz, CDCl<sub>3</sub>) δ 206.00, 196.21, 136.25, 136.06, 133.81, 133.78, 128.89, 128.85, 128.78, 128.76, 59.82, 59.68,

27.13, 27.02, 20.53, 20.30, 12.34, 12.30, 12.03, 11.99. HRMS (ESI) Calc' d for  $C_{25}H_{24}O_4Na$   $[M + Na]^+$ : 411.1572; found: 411.1575.

**(2R, 4S)-2,4-dibenzoyl-1,5-dicyclohexylpentane-1,5-dione (2v)**: Following the general procedure, a 15 mL

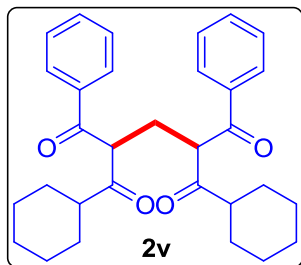

reaction tube was charged with 1-cyclohexyl-3-phenylpropane-1, 3-dione (**1v**) (46 mg, 0.2 mmol), 2-methoxyethanol (0.25 M),  $NaHCO_3$  (2.0 equiv) and allowed to stir at 65 °C under  $O_2$  until the completion of reaction by TLC. After completion, the reaction mixture was cooled to room temperature and diluted with 10 mL of water. The water

layer was extracted with (3X10 mL) of ethyl acetate and the combined ethyl acetate

layer was given brine wash (1X10 mL). The final ethyl acetate layer was dried over sodium sulfate and

concentrated under reduced pressure to get the crude compound. The obtained crude was purified using column

chromatography by eluting from (Hex/EA = 9/1) to afford the corresponding (2R,4S)-2,4-dibenzoyl-1,5-

dicyclohexylpentane-1,5-dione (**2v**) as a yellow liquid (43 mg, yield = 92%); The ratio of the two diastereomers

is 1:1;  $^1H$  NMR (400 MHz,  $CDCl_3$ )  $\delta$  8.21 - 8.19 (m, 2H), 8.05 - 8.02 (m, 2H), 7.64-7.59 (m, 2H), 7.55 - 7.50

(m, 4H), 4.94 (dd,  $J$  = 8.0, 6.4 Hz, 1H), 4.82 (t,  $J$  = 7.2 Hz, 1H), 2.50 - 2.30 (m, 4H), 1.83 - 1.60 (m, 10H), 1.50

- 1.28 (m, 3H), 1.20 - 1.15 (m, 7H);  $^{13}C$  NMR (100 MHz,  $CDCl_3$ )  $\delta$  203.92, 203.36, 196.60, 196.37, 135.90,

135.58, 134.03, 129.01, 128.95, 128.89, 128.79, 59.33, 59.15, 29.40, 29.09, 27.38, 27.01. HRMS (ESI) Calc' d for  $C_{31}H_{36}O_4Na$   $[M + Na]^+$ : 495.2511; found: 495.2510.

**2,2'-methylene-bis-(3-hydroxycyclohex-2-en-1-one) (2w)**<sup>6</sup>: Following the general procedure, a 15 mL

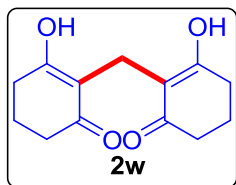

reaction tube was charged with cyclohexane-1, 3-dione (**1w**) (22 mg, 0.2 mmol), 2-methoxyethanol (0.25 M),  $NaHCO_3$  (2.0 equiv) and allowed to stir at 65 °C under  $O_2$  until the completion of reaction by TLC. After completion, the reaction mixture was cooled to

room temperature and diluted with 10.0 mL of water. The water layer was extracted with

(3X10 mL) of ethyl acetate, and the combined ethyl acetate layer was given brine wash (1X10 mL). The final

ethyl acetate layer was dried over sodium sulfate and concentrated under reduced pressure to get the crude

compound. The obtained crude was purified using column chromatography by eluting from (Hex/EA = 8/2) to

afford the corresponding 2,2'-methylene-bis-(3-hydroxycyclohex-2-en-1-one) (**2w**) as a white solid (12 mg,

yield = 51%); Mp. 130.1-131 °C;  $^1H$  NMR (400 MHz,  $CDCl_3$ )  $\delta$  3.14 (s, 2H), 2.48 (dd,  $J$  = 17.6, 9.2 Hz, 4H),

2.38 - 2.31 (m, 4H), 1.93 (ddd,  $J$  = 14.0, 9.2, 4.8 Hz, 4H);  $^{13}C$  NMR (100 MHz,  $CDCl_3$ )  $\delta$  190.99, 114.66, 32.28,

20.29, 16.46.

**2,3,5,6-tetraphenylpyridine (3a)**<sup>8</sup>: Following the general procedure, a 15 mL reaction tube was charged with 1,

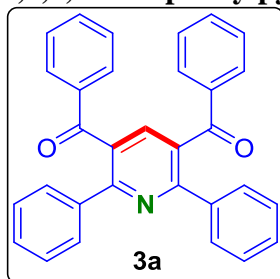

3-diphenylpropane-1,3-dione (**1a**) (45 mg, 0.2 mmol), 2-methoxyethanol (0.25 M),

$NaHCO_3$  (2.0 equiv),  $NH_4OAc$  (5.0 equiv) and allowed to stir at 65 °C under  $O_2$  until

the completion of reaction by TLC. After completion, the reaction mixture was cooled



to room temperature and diluted with 10 mL of water. The water layer was extracted with (3X10 mL) of ethyl acetate, and the combined ethyl acetate layer was given brine wash (1X10 mL). The final ethyl acetate layer was dried over sodium sulfate and concentrated under reduced pressure to get the crude compound. The obtained crude was purified using column chromatography by eluting from (Hex/EA = 9/1) to afford the corresponding 2, 3, 5, 6-tetraphenylpyridine (**3a**) as a white solid (32 mg, yield = 72%); Mp. 197-198 °C; <sup>1</sup>H NMR (400 MHz, CDCl<sub>3</sub>) δ 8.05 (s, 1H), 7.74 - 7.72 (m, 4H), 7.70 - 7.66 (m, 4H), 7.47 - 7.43 (m, 2H), 7.33 - 7.27 (m, 10H); <sup>13</sup>C NMR (100 MHz, CDCl<sub>3</sub>) δ 196.60, 158.00, 138.79, 138.55, 136.35, 133.51, 131.85, 129.88, 129.52, 129.40, 128.45, 128.37.

**(2,6-di-*p*-tolylpyridine-3,5-diyl)bis(*p*-tolylmethanone) (**3b**)**<sup>8</sup>: Following the general procedure, a 15 mL

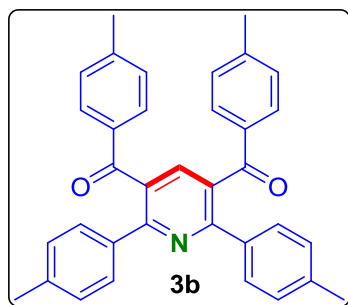

reaction tube was charged with 1,3-di-*p*-tolylpropane-1,3-dione (**1b**) (50 mg, 0.2 mmol), 2-methoxyethanol (0.25 M), NaHCO<sub>3</sub> (2.0 equiv), NH<sub>4</sub>OAc (5.0 equiv) and allowed to stir at 65 °C under O<sub>2</sub> until the completion of reaction by TLC. After completion, the reaction mixture was cooled to room temperature and diluted with 10 mL of water. The water layer was extracted with (3X10 mL) of ethyl acetate, and the combined ethyl acetate layer was given brine wash (1X10

mL). The final ethyl acetate layer was dried over sodium sulfate and concentrated under reduced pressure to get the crude compound. The obtained crude was purified using column chromatography by eluting from (Hex/EA = 9/1) to afford the corresponding (2,6-di-*p*-tolylpyridine-3,5-diyl)bis(*p*-tolylmethanone) (**3b**) as a yellow solid (30 mg, yield = 60%); Mp. 184-185.3 °C; <sup>1</sup>H NMR (400 MHz, CDCl<sub>3</sub>) δ 7.89 (s, 1H), 7.64 (dd, *J* = 18.0, 7.2 Hz, 8H), 7.12 (dd, *J* = 18.0, 6.8 Hz, 8H), 2.35 (s, 6H), 2.29 (s, 6H); <sup>13</sup>C NMR (100 MHz, CDCl<sub>3</sub>) δ 196.39, 157.51, 144.53, 139.39, 138.30, 135.80, 133.94, 131.47, 130.23, 129.42, 129.24, 129.11, 21.70, 21.28.

**(2,6-di-*p*-tolylpyridine-3,5-diyl)bis(phenylmethanone) (**3d**)**<sup>9</sup>: Following the general procedure, a 15 mL

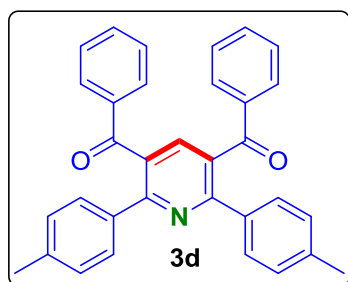

reaction tube was charged with 1-phenyl-3-(*p*-tolyl)propane-1,3-dione (**1d**) (48 mg, 0.2 mmol), 2-methoxyethanol (0.25 M), NaHCO<sub>3</sub> (2.0 equiv), NH<sub>4</sub>OAc (5.0 equiv) and allowed to stir at 65 °C under O<sub>2</sub> until the completion of reaction by TLC. After completion, the reaction mixture was cooled to room temperature and diluted with 10 mL of water. The water layer was extracted with (3X10 mL) of ethyl acetate, and the combined ethyl acetate layer was given brine wash (1X10

mL). The final ethyl acetate layer was dried over sodium sulfate and concentrated under reduced pressure to get the crude compound. The obtained crude was purified using column chromatography by eluting from (Hex/EA = 9/1) to afford the corresponding (2,6-di-*p*-tolylpyridine-3,5-diyl)bis(phenylmethanone) (**3d**) as a red solid (33 mg, yield = 70%); Mp. 202.1-203 °C; The ratio of the two diastereomers is 2:1; <sup>1</sup>H NMR (400 MHz, CDCl<sub>3</sub>) δ 7.96 (s, 1H), 7.76 - 7.57 (m, 8H), 7.35 - 7.26 (m, 6H), 7.14-7.07 (m, 4H), 2.34 (s, 4H), 2.28 (s, 2H).; <sup>13</sup>C NMR (100 MHz, CDCl<sub>3</sub>) δ 196.77, 196.22, 157.81, 157.73, 157.64, 144.61, 144.58, 139.51, 138.63, 138.55, 138.38,

136.42, 135.76, 133.89, 133.48, 132.06, 131.80, 131.56, 130.14, 129.98, 129.48, 129.31, 129.23, 129.14, 128.48, 128.36, 21.69, 21.26.

**Diethyl 2, 6-diphenylpyridine-3, 5-dicarboxylate (3o)**<sup>8</sup>: Following the general procedure, a 15 mL reaction

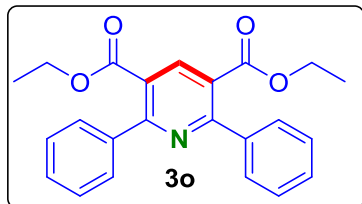

tube was charged with ethyl 3-oxo-3-phenylpropanoate (**1o**) (38 mg, 0.2 mmol), 2-methoxyethanol (0.25 M), NaHCO<sub>3</sub> (2.0 equiv), NH<sub>4</sub>OAc (5.0 equiv) and allowed to stir at 65 °C under O<sub>2</sub> until the completion of the reaction by TLC.

After completion, the reaction mixture was cooled to room temperature and diluted with 10 mL of water. The water layer was extracted with (3X10 mL) of ethyl acetate, and the combined ethyl acetate layer was given brine wash (1X10 mL). The final ethyl acetate layer was dried over sodium sulfate and concentrated under reduced pressure to get the crude compound. The obtained crude was purified using column chromatography by eluting from (Hex/EA = 9/1) to afford the corresponding diethyl 2,6-diphenylpyridine-3,5-dicarboxylate (**3o**) as a yellow liquid (31 mg, yield = 83%); Mp. 52-53 °C; <sup>1</sup>H NMR (400 MHz, CDCl<sub>3</sub>) δ 8.54 (s, 1H), 7.64-7.61 (m, 4H), 6.44-7.42 (m, 4H), 4.21 (q, *J* = 7.2 Hz, 4H), 1.10 (t, *J* = 7.2 Hz, 6H); <sup>13</sup>C NMR (100 MHz, CDCl<sub>3</sub>) δ 167.41, 159.75, 140.28, 139.38, 129.17, 128.94, 128.08, 124.83, 61.68, 13.70.

**Diethyl 2,6-bis(4-methoxyphenyl)pyridine-3,5-dicarboxylate (3p)**<sup>10</sup>: Following the general procedure, a 15

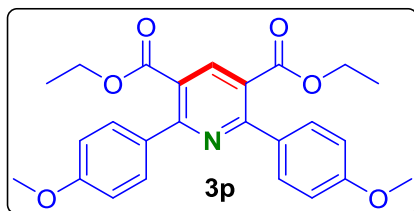

mL reaction tube was charged with ethyl 3-(4-methoxyphenyl)-3-oxopropanoate (**1p**) (44 mg, 0.2 mmol), 2-methoxyethanol (0.25 M), NaHCO<sub>3</sub> (2.0 equiv), NH<sub>4</sub>OAc (5.0 equiv) and allowed to stir at 65 °C under O<sub>2</sub> until the completion of reaction by TLC. After completion, the reaction

mixture was cooled to room temperature and diluted with 10 mL of water. The water layer was extracted with (3X10 mL) of ethyl acetate, and the combined ethyl acetate layer was given brine wash (1X10 mL). The final ethyl acetate layer was dried over sodium sulfate and concentrated under reduced pressure to get the crude compound. The obtained crude was purified using column chromatography by eluting from (Hex/EA = 9/1) to afford the corresponding diethyl 2,6-bis(4-methoxyphenyl)pyridine-3,5-dicarboxylate (**3p**) as a white solid (34 mg, yield = 79%); Mp. 100-101 °C; <sup>1</sup>H NMR (400 MHz, CDCl<sub>3</sub>) δ 8.74 (s, 1H), 7.62 (d, *J* = 8.8 Hz, 4H), 6.96 (d, *J* = 8.8 Hz, 4H), 4.24 (q, *J* = 7.2 Hz, 4H), 3.89 (s, 3H), 1.17 (t, *J* = 7.2 Hz, 6H); <sup>13</sup>C NMR (100 MHz, CDCl<sub>3</sub>) δ 167.79, 160.67, 158.93, 140.47, 131.78, 130.56, 123.47, 113.52, 61.57, 55.33, 13.87.

**Diethyl 2, 6-bis(4-nitrophenyl)pyridine-3,5-dicarboxylate (3q)**<sup>11</sup>: Following the general procedure, a 15 mL

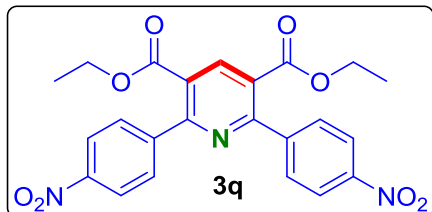

reaction tube was charged with ethyl 3-(4-nitrophenyl)-3-oxopropanoate (**1q**) (47 mg, 0.2 mmol), 2-methoxyethanol (0.25 M), NaHCO<sub>3</sub> (2.0 equiv), NH<sub>4</sub>OAc (5.0 equiv) and allowed to stir at 65 °C under O<sub>2</sub> until the completion of reaction by TLC. After completion, the reaction mixture was

cooled to room temperature and diluted with 10 mL of water. The water layer was extracted with (3X10 mL) of ethyl acetate, and the combined ethyl acetate layer was given brine wash (1X10 mL). The final ethyl acetate layer was dried over sodium sulfate and concentrated under reduced pressure to get the crude compound. The obtained crude was purified using column chromatography by eluting from (Hex/EA = 9/1) to afford the corresponding diethyl 2,6-*bis*(4-nitrophenyl)pyridine-3,5-dicarboxylate (**3q**) as a yellow solid (34 mg, yield = 73%); Mp. 195.5-196.8 °C; <sup>1</sup>H NMR (400 MHz, CDCl<sub>3</sub>) δ 8.75 (s, 1H), 8.32 (d, *J* = 8.8 Hz, 4H), 7.77 (d, *J* = 8.8 Hz, 4H), 4.27 (q, *J* = 7.2 Hz, 4H), 1.19 (t, *J* = 7.2 Hz, 6H); <sup>13</sup>C NMR (100 MHz, CDCl<sub>3</sub>) δ 165.76, 158.24, 148.30, 145.02, 141.29, 129.98, 125.96, 123.34, 62.31, 13.82.

**(2,6-di(thiophen-2-yl)pyridine-3,5-diyl)*bis*(phenylmethanone) (3r)**: Following the general procedure, a 15

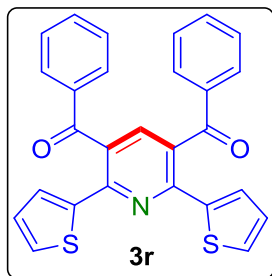

mL reaction tube was charged 1-phenyl-3-(thiophen-2-yl)propane-1,3-dione (**1r**) (46 mg, 0.2 mmol), 2-methoxyethanol (0.25 M), NaHCO<sub>3</sub> (2.0 equiv), NH<sub>4</sub>OAc (5.0 equiv) and allowed to stir at 65 °C under O<sub>2</sub> until the completion of reaction by TLC. After completion, the reaction mixture was cooled to room temperature and diluted with 10 mL of water. The water layer was extracted with (3X10 mL) of ethyl acetate, and the combined ethyl acetate layer was given brine wash (1X10 mL). The final ethyl acetate

layer was dried over sodium sulfate and concentrated under reduced pressure to get the crude compound. The obtained crude was purified using column chromatography by eluting from (Hex/EA = 9/1) to afford the corresponding (2,6-di(thiophen-2-yl)pyridine-3,5-diyl)*bis*(phenylmethanone) (**3r**) as a yellow solid (34 mg, yield = 76%); Mp. 202.1-202.3 °C; <sup>1</sup>H NMR (400 MHz, CDCl<sub>3</sub>) δ 8.11 (s, 1H), 7.76 (dd, *J* = 7.6, 4.4 Hz, 4H), 7.64 - 7.62 (m, 2H), 7.36 - 7.32 (m, 8H), 6.97 - 6.95 (m, 2H); <sup>13</sup>C NMR (100 MHz, CDCl<sub>3</sub>) δ 188.43, 157.56, 143.58, 138.50, 138.10, 135.58, 135.52, 131.75, 129.52, 129.42, 128.51, 128.25. HRMS (ESI) Calc'd for C<sub>27</sub>H<sub>18</sub>NO<sub>2</sub>S<sub>2</sub> [M + H]<sup>+</sup>: 452.0779; found: 452.0780.

**(2,6-dimethylpyridine-3,5-diyl)*bis*(phenylmethanone) (3t)**<sup>12</sup>: Following the general procedure, a 15 mL

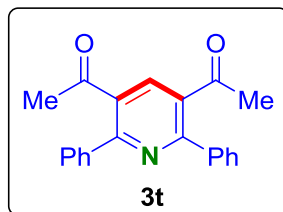

reaction tube was charged with 1-phenylbutane-1, 3-dione (**1t**) (32 mg, 0.2 mmol), 2-methoxyethanol (0.25 M), NaHCO<sub>3</sub> (2.0 equiv), NH<sub>4</sub>OAc (5.0 equiv) and allowed to stir at 65 °C under O<sub>2</sub> until the completion of the reaction by TLC. After completion, the reaction mixture was cooled to room temperature and diluted with 10 mL of water.

The water layer was extracted with (3X10 mL) of ethyl acetate, and the combined ethyl acetate layer was given brine wash (1X10 mL). The final ethyl acetate layer was dried over sodium sulfate and concentrated under reduced pressure to get the crude compound. The obtained crude was purified using column chromatography by eluting from (Hex/EA = 9/1) to afford the corresponding (2,6-dimethylpyridine-3,5-diyl)*bis*(phenylmethanone) (**3t**) as a yellow liquid (20 mg, yield = 63%); <sup>1</sup>H NMR (400 MHz, CDCl<sub>3</sub>) δ 7.78 (m, 4H), 7.61 (dd, *J* = 7.6, 4.0 Hz, 3H), 7.48 (t, *J* = 8.0 Hz, 4H), 2.62 (s, 6H); <sup>13</sup>C NMR (100 MHz, CDCl<sub>3</sub>) δ 196.06, 158.01, 136.77, 136.64, 133.82, 130.63, 129.96, 128.77, 23.39.

**3,4,6,7-tetrahydroacridine-1,8 (2*H*, 5*H*)-dione (3w)**<sup>13</sup>: Following the general procedure, a 15 mL reaction

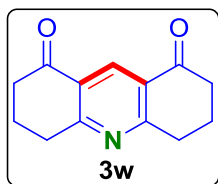

tube was charged with ethyl 3-(4-nitrophenyl)-3-oxopropanoate (**1w**) (22 mg, 0.2 mmol), 2-methoxyethanol (0.25 M), NaHCO<sub>3</sub> (2.0 equiv), NH<sub>4</sub>OAc (5.0 equiv) and allowed to stir at 65 °C under O<sub>2</sub> until the completion of reaction by TLC. After completion, the reaction mixture was cooled to room temperature and diluted with 10 mL of water. The water layer was extracted with (3X10 mL) of ethyl acetate, and the combined ethyl acetate layer was given brine wash (1X10 mL). The final ethyl acetate layer was dried over sodium sulfate and concentrated under reduced pressure to get the crude compound. The obtained crude was purified using column chromatography by eluting from (Hex/EA = 9/1) to afford the corresponding diethyl 3,4,6,7-tetrahydroacridine-1,8(2*H*,5*H*)-dione (**3w**) as a brown solid (10 mg, yield = 45 %); Mp. 159.5-161 °C; <sup>1</sup>H NMR (400 MHz, CDCl<sub>3</sub>) δ 8.87 (s, 1H), 3.19 (t, *J* = 6.0 Hz, 4H), 2.72 (t, *J* = 6.0 Hz, 4H), 2.25 - 2.18 (m, 4H); <sup>13</sup>C NMR (100 MHz, CDCl<sub>3</sub>) δ 196.50, 167.08, 134.88, 127.37, 38.39, 32.77, 21.39.

**diethyl 2,6-diphenyl-1,4-dihydropyridine-3,5-dicarboxylate (5o)**<sup>14</sup>: Following the general procedure, a 15

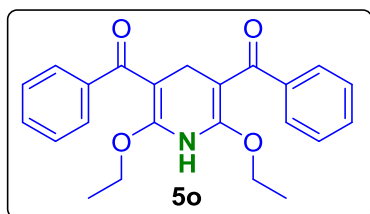

mL reaction tube was charged with diethyl (2*R*, 4*S*)-2, 4-dibenzoylpentanedioate (**2o**) (79 mg, 0.2 mmol Ethanol (2 mL), NH<sub>4</sub>OAc (5.0 equiv) and allowed to stir at 100 °C under N<sub>2</sub> until the completion of reaction by TLC. After completion, the reaction mixture was cooled to room temperature and diluted with 10 mL of

water. The water layer was extracted with (3X10 mL) of ethyl acetate, and the combined ethyl acetate layer was given brine wash (1X10 mL). The final ethyl acetate layer was dried over sodium sulfate and concentrated under reduced pressure to get the crude compound. The obtained crude was purified using column chromatography by eluting from (Hex/EA = 8/2) to afford the corresponding diethyl 2,6-diphenyl-1,4-dihydropyridine-3,5-dicarboxylate (**5o**) as a yellow solid (52 mg, yield = 69%); Mp 53.2-54 °C; <sup>1</sup>H NMR (400 MHz, CDCl<sub>3</sub>) δ 7.37 - 7.35 (m, 6H), 7.32 - 7.30 (m, 4H), 5.46 (s, 1H), 3.95 (q, *J* = 7.2 Hz, 4H), 3.62 (s, 2H), 0.95 (t, *J* = 7.2 Hz, 6H); <sup>13</sup>C NMR (100 MHz, CDCl<sub>3</sub>) δ 167.16, 146.52, 136.85, 128.96, 128.29, 127.82, 100.15, 59.68, 25.83, 13.80.

**(2,6-diethoxy-1,4-dihydropyridine-3,5-diyl)bis((4-nitrophenyl)methanone) (5q)**<sup>14</sup>: Following the general

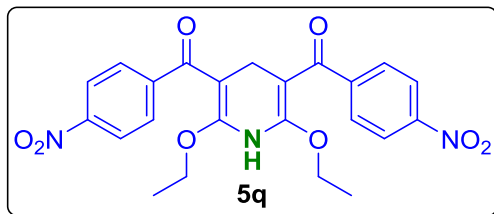

procedure, a 15 mL reaction tube was charged with diethyl 2,6-bis (4-nitrophenyl)pyridine-3,5-dicarboxylate (**2q**) (97 mg, 0.2 mmol), Ethanol (2 mL), NH<sub>4</sub>OAc (5.0 equiv) and allowed to stir at 100 °C under N<sub>2</sub> until the completion of reaction by TLC. After completion,

the reaction mixture was cooled to room temperature and diluted with 10 mL of water. The water layer was extracted with (3X10 mL) of ethyl acetate, and the combined ethyl acetate layer was given brine wash (1X10 mL). The final ethyl acetate layer was dried over sodium sulfate and concentrated under reduced pressure to get the crude compound. The obtained crude was purified using column chromatography by eluting from (Hex/EA

= 8/2) to afford the corresponding (2,6-diethoxy-1,4-dihydropyridine-3,5-diyl) *bis* ((4-nitrophenyl)methanone) (**5q**) as a yellow solid (58 mg, yield = 62%); Mp. 177.5-179 °C; The ratio of the two diastereomers is 7:1; <sup>1</sup>H NMR (400 MHz, CDCl<sub>3</sub>) δ 8.20 (d, *J* = 8.8 Hz, 4H), 7.50 (d, *J* = 8.6 Hz, 4H), 5.57 (s, 1H), 3.97 (q, *J* = 7.2 Hz, 4H), 3.62 (s, 2H), 1.00 (t, *J* = 7.2 Hz, 6H); <sup>13</sup>C NMR (100 MHz, CDCl<sub>3</sub>) δ 166.20, 147.94, 144.06, 142.84, 129.97, 129.21, 123.61, 123.31, 102.10, 60.27, 25.61, 13.88.

**(2,6-di(thiophen-2-yl)-1,4-dihydropyridine-3,5-diyl)*bis*(phenylmethanone) (5r):** Following the general

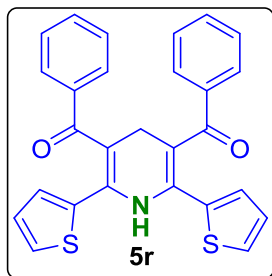

procedure, a 15 mL reaction tube was charged with (2*R*,4*S*)-2,4-dibenzoyl-1,5-di(thiophen-2-yl)pentane-1,5-dione (**2r**) (94 mg, 0.2 mmol), Ethanol (2 mL), NH<sub>4</sub>OAc (5.0 equiv) and allowed to stir at 100 °C under N<sub>2</sub> until the completion of reaction by TLC. After completion, the reaction mixture was cooled to room temperature and diluted with 10 mL of water. The water layer was extracted with (3X10 mL) of ethyl acetate, and the combined ethyl acetate layer was given brine wash (1X10 mL). The

final ethyl acetate layer was dried over sodium sulfate and concentrated under reduced pressure to get the crude compound. The obtained crude was purified using column chromatography by eluting from (Hex/EA = 8/2) to afford the corresponding (2,6-di(thiophen-2-yl)-1,4-dihydropyridine-3,5-diyl)*bis*(phenylmethanone) (**5r**) as a yellow solid (66 mg, yield = 73%); Mp. 113.5-114.3 °C; <sup>1</sup>H NMR (400 MHz, CDCl<sub>3</sub>) δ 10.12 (s, 1H), 7.65 -7.61(m, 6H), 7.50 - 7.46 (m, 8H), 7.09 (dd, *J* = 4.8, 3.6 Hz, 2H), 6.01 (s, 2H); <sup>13</sup>C NMR (100 MHz, CDCl<sub>3</sub>) δ 182.78, 162.57, 147.07, 137.31, 130.73, 130.60, 129.01, 128.21, 127.76, 127.15, 126.28, 91.60. HRMS (ESI) Calc'd for C<sub>27</sub> H<sub>19</sub> N O<sub>2</sub> S<sub>2</sub> [M + H]<sup>+</sup>: 453.0563; found: 453.0560.

**(2,6-dimethyl-1,4-dihydropyridine-3,5-diyl)*bis*(phenylmethanone) (5t)<sup>12</sup>:** Following the general procedure, a

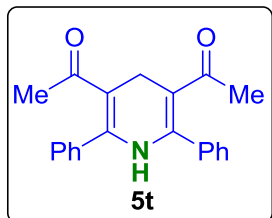

15 mL reaction tube was charged with (3*R*,5*S*)-3,5-dibenzoylheptane-2,6-dione (**2t**) (67 mg, 0.2 mmol), Ethanol (2 mL), NH<sub>4</sub>OAc (5.0 equiv) and allowed to stir at 100 °C under N<sub>2</sub> until the completion of the reaction by TLC. After completion, the reaction mixture was cooled to room temperature and diluted with 10 mL of water. The water layer was extracted with (3X10 mL) of ethyl acetate, and the combined ethyl acetate

layer was given brine wash (1X10 mL). The final ethyl acetate layer was dried over sodium sulfate and concentrated under reduced pressure to get the crude compound. The obtained crude was purified using column chromatography by eluting from (Hex/EA = 8/2) to afford the corresponding (2,6-dimethyl-1,4-dihydropyridine-3,5-diyl)*bis*(phenylmethanone) (**5t**) as a yellow solid (39 mg, yield = 62%); Mp. 142.1-143 °C; <sup>1</sup>H NMR (400 MHz, CDCl<sub>3</sub>) δ 10.20 (s, 1H), 7.87 (dd, *J* = 7.6, 1.2 Hz, 4H), 7.45 - 7.37 (m, 6H), 5.73 (s, 2H), 2.04 (s, 6H); <sup>13</sup>C NMR (100 MHz, CDCl<sub>3</sub>) δ 189.38, 163.02, 140.12, 130.74, 128.14, 127.02, 92.22, 22.83.

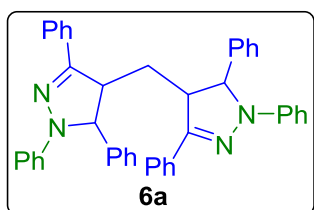

***bis*(1,3,5-triphenyl-4,5-dihydro-1*H*-pyrazol-4-yl) methane (6a)<sup>14</sup>:** Following the general procedure, a 15 mL reaction tube was charged with 2,4-dibenzoyl-1,5-

diphenylpentane-1,5-dione (**2a**) (92 mg, 0.2 mmol), CH<sub>3</sub>COOH (0.1 ml), EtOH (3 mL) and allowed to stir at 90 °C under N<sub>2</sub> until the completion of reaction by TLC. After completion, the reaction mixture was cooled to room temperature and diluted with 10 mL of water. The water layer was extracted with (3X10 mL) of ethyl acetate, and the combined ethyl acetate layer was given brine wash (1X10 mL). The final ethyl acetate layer was dried over sodium sulfate and concentrated under reduced pressure to get the crude compound. The obtained crude was purified using column chromatography by eluting from (Hex/EA = 8/2) to afford the corresponding *bis* (1,3,5-triphenyl-4,5-dihydro-1*H*-pyrazol-4-yl)methane (**6a**) as a brown solid (96 mg, yield = 79%); Mp. 206-207.1 °C; <sup>1</sup>H NMR (400 MHz, CDCl<sub>3</sub>) δ 7.47 - 7.45 (m, 4H), 7.39 - 7.31 (m, 6H), 7.28 - 7.10 (m, 12H), 6.98 (d, *J* = 6.4 Hz, 4H), 6.88 (d, *J* = 6.8 Hz, 4H), 4.18 (s, 2H); <sup>13</sup>C NMR (100 MHz, CDCl<sub>3</sub>) δ 151.38, 141.33, 139.85, 133.38, 130.17, 130.11, 128.42, 128.39, 127.88, 127.84, 127.36, 126.71, 124.95, 116.40, 20.43.

## 5. References

- 1 K. Oshimoto, H. Tsuji and M. Kawatsura, *Org. Biomol. Chem.*, 2019, **17**, 4225.
- 2 X. Wang, Y. Wang, Y. Yuan, and C.-H. Xing, *Tetrahedron.*, 2014, **70**, 2195.
- 3 R. Balamurugan and S. Manojveer, *Commun Chem.*, 2011, **47**, 11143.
- 4 X.-J. Dai, X.-L. Xu, D.-P. Cheng and X.-N. Li, *Chin. Chem. Lett.*, 2014, **25**, 545.
- 5 L.-J. Xing, X.-M. Wang, H.-Y. Li, W. Zhou, N. Kang, P. Wang and B. Wang, *RSC Adv.*, 2014, **4**, 26783.
- 6 S. T. Handy and D. Omune, *Org. Lett.*, 2005, **7**, 1553.
- 7 L.-L. Wu, L. Tang, S.-G. Zhou, Y.-J. Peng, X.-D. He, Z. Guan, and Y.-H. He, *Tetrahedron.*, 2017, **73**, 6471.
- 8 Y. Gao, D. Zhou, and Y. Ma, *ChemistrySelect.*, 2018, **3**, 9374.
- 9 P. Kumar and M. Kapur, *Org. Lett.*, 2020, **22** 5855.
- 10 L. Xue, G. Cheng, R. Zhu and X. Cui, *RSC Adv.*, 2017, **7**, 44009.
- 11 B. S. Chekavichus, A. E. Sausin, R. M. Zolotoyabko, E. E. Liepin'sh, I. B. Mazheika, and G. Y. Dubur, *Heterocycl. Comp.*, 1986, **22**, 410.
- 12 K. Garkushenko, M. A. Makarova, O. P. Sorokina, N. V. Poendaev, M. A. Vorontsova, and G. P. Sagitullina, *Chem. Heterocycl. Comp.*, 2011, **47**, 482.
- 13 L. Chang, J. Lai and G. Yuan, *Chin. J. Chem.*, 2016, **34**, 887.
- 14 H. Li, Z. He, X. Guo, W. Li, X. Zhao, and Z. Li, *Org. Lett.*, 2009, **11**, 4176.

Solvent  $\text{CDCl}_3$   
Spectrometer Frequency 400.40

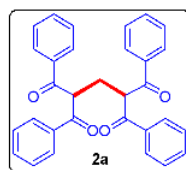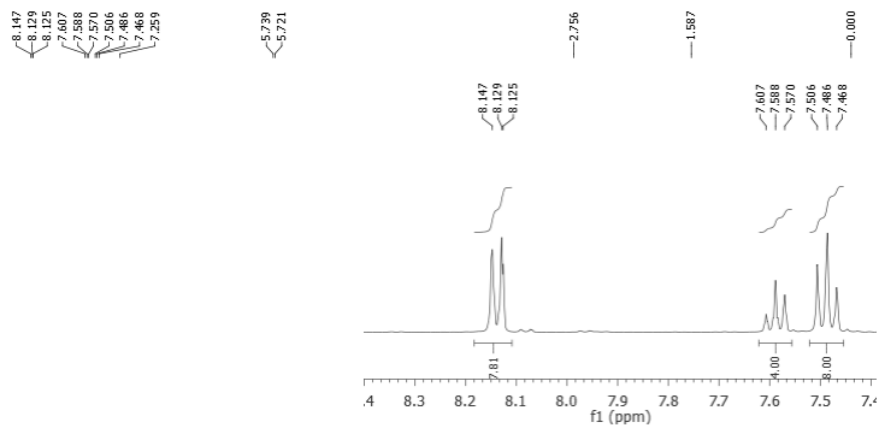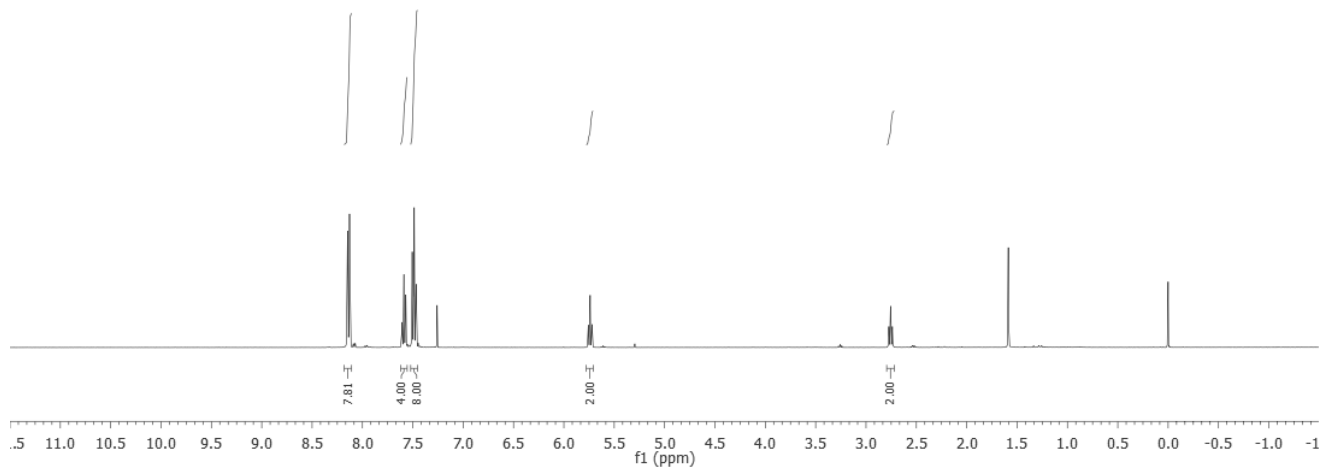

Solvent  $\text{CDCl}_3$   
Spectrometer Frequency 100.69

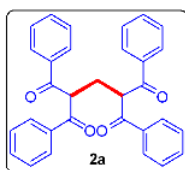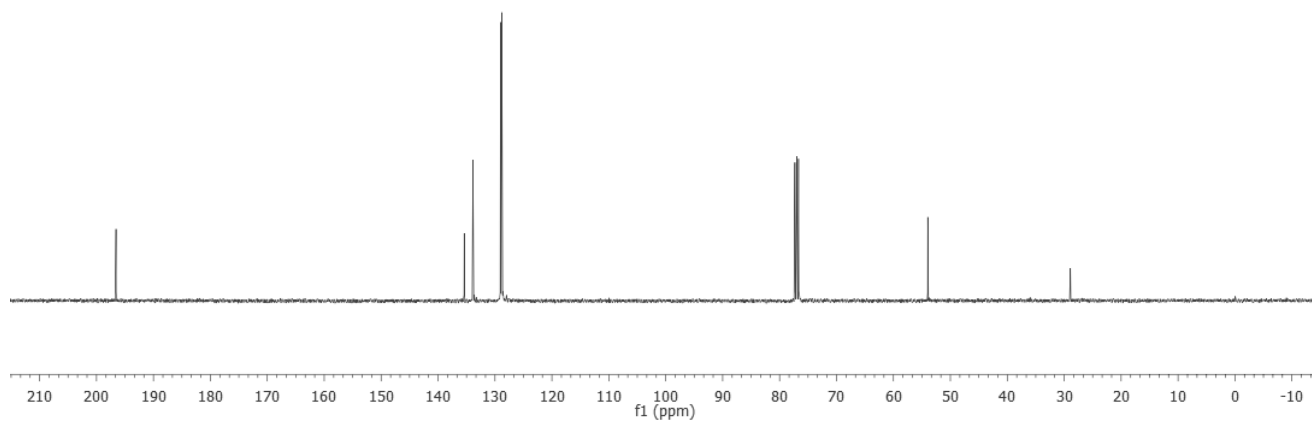



Solvent  $\text{CDCl}_3$   
Spectrometer Frequency 400.40

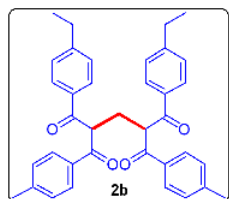

8.033  
8.028  
8.023  
8.011  
8.007  
7.272  
7.271  
7.258  
7.251  
7.249

5.682  
5.665  
5.647  
8.033  
8.028  
8.023  
8.011  
8.007  
8.002

2.718  
2.701  
2.683  
2.389

7.272  
7.271  
7.258  
7.251  
7.249

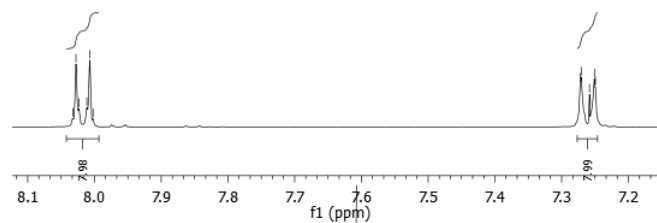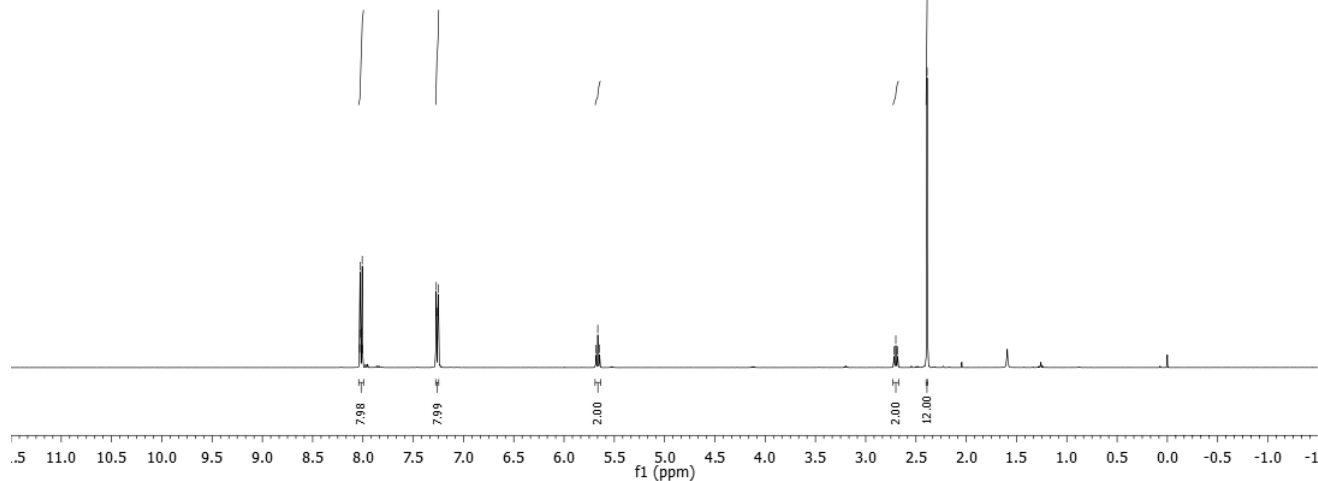

Solvent  $\text{CDCl}_3$   
Spectrometer Frequency 100.69

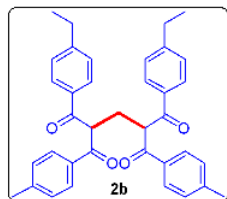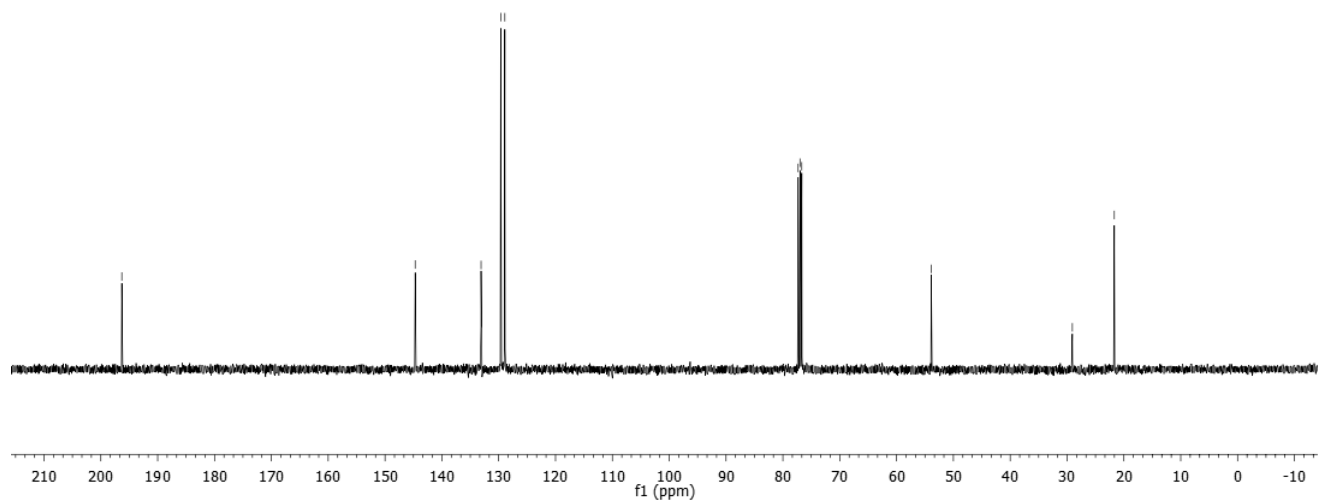

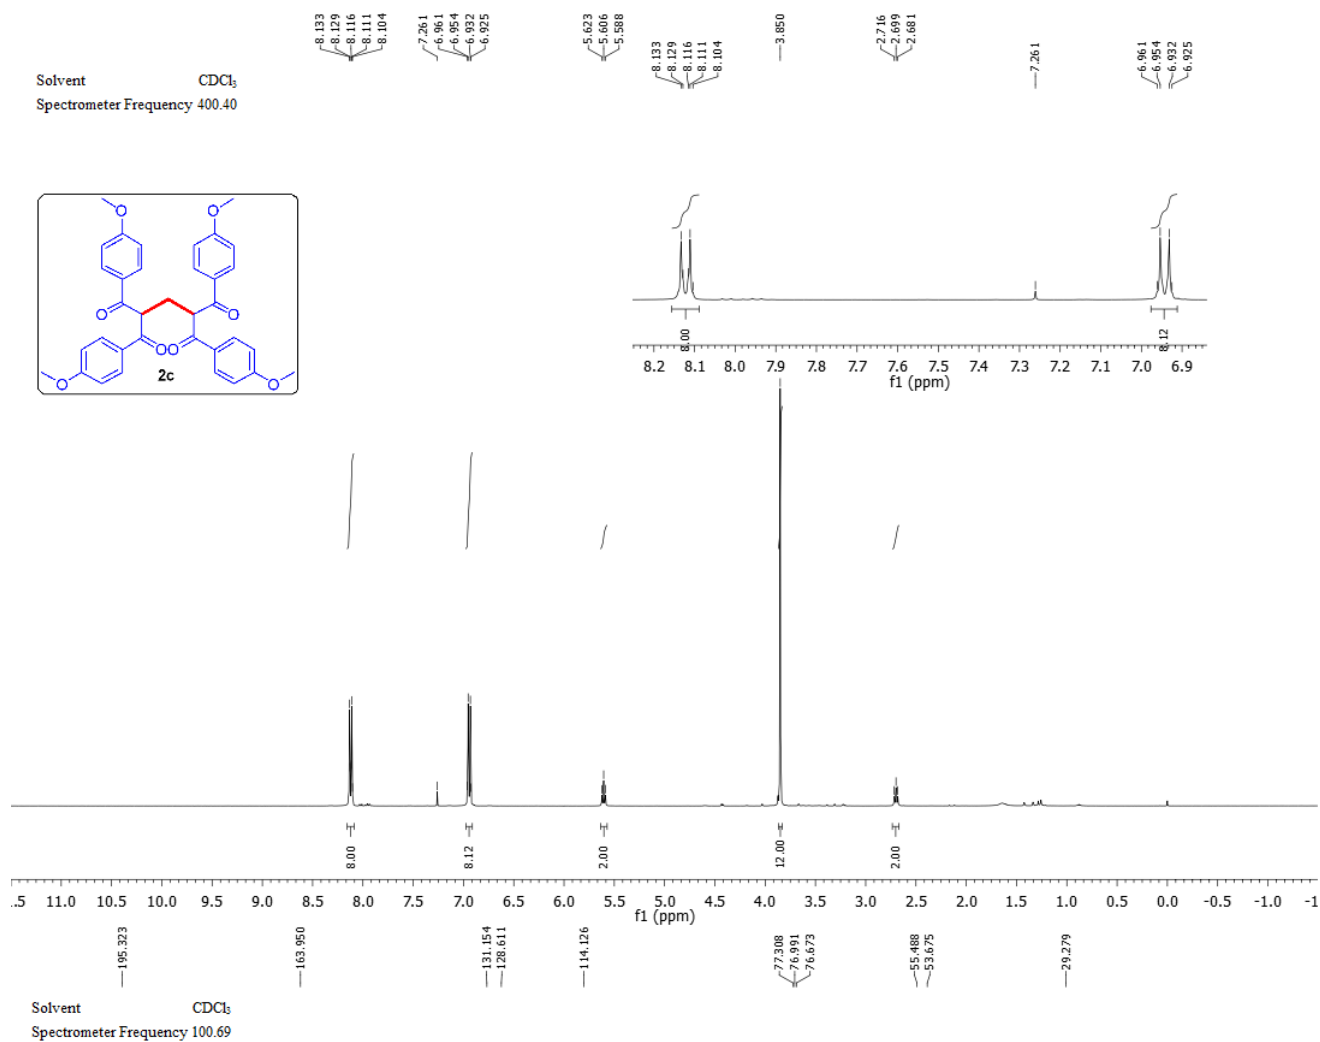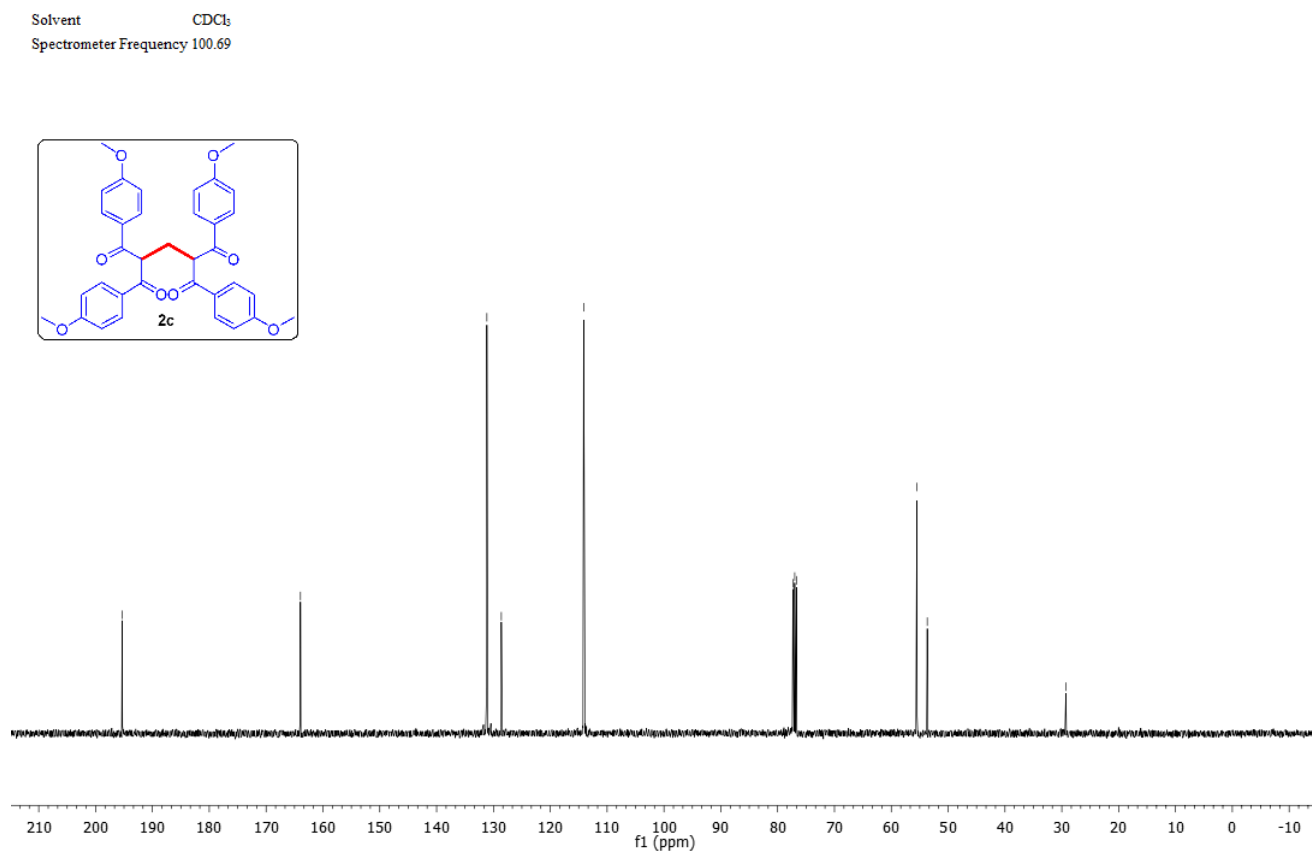

Solvent  $\text{CDCl}_3$   
Spectrometer Frequency 400.40  
Nucleus  $^1\text{H}$

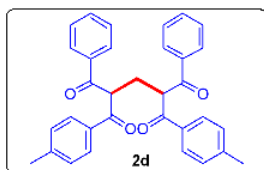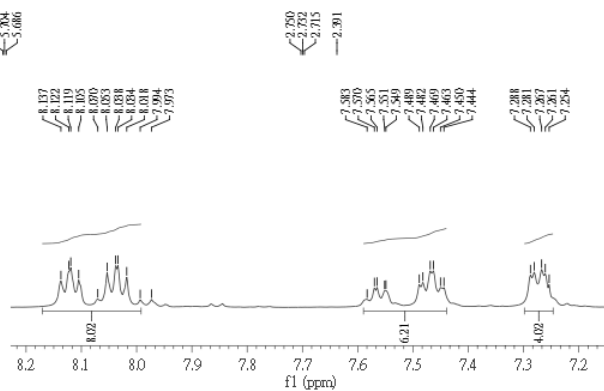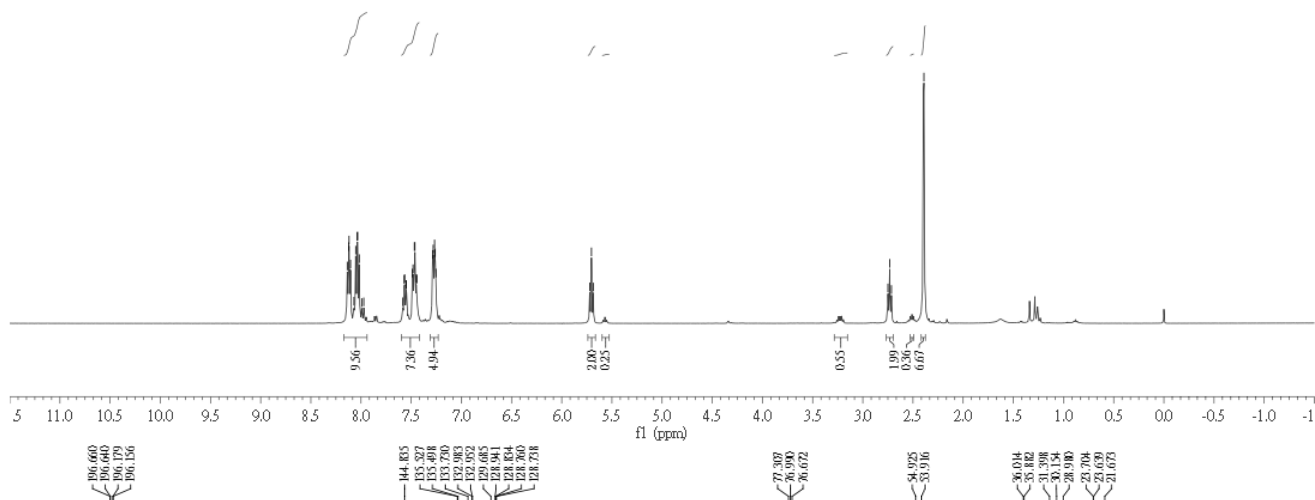

Solvent  $\text{CDCl}_3$   
Spectrometer Frequency 100.69  
Nucleus  $^{13}\text{C}$

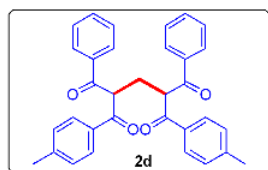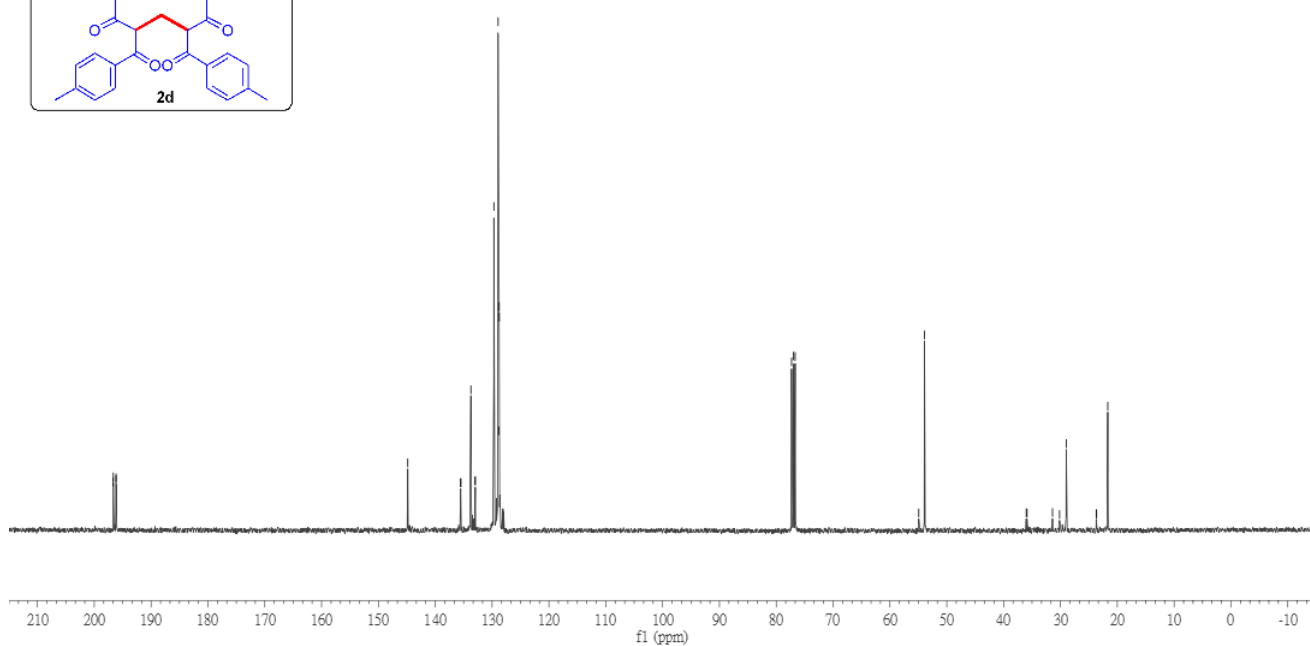

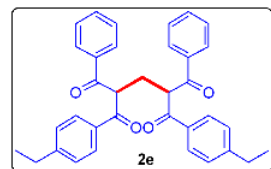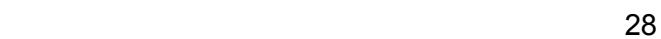

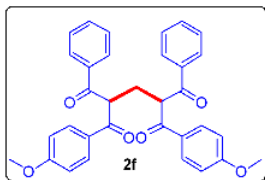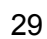



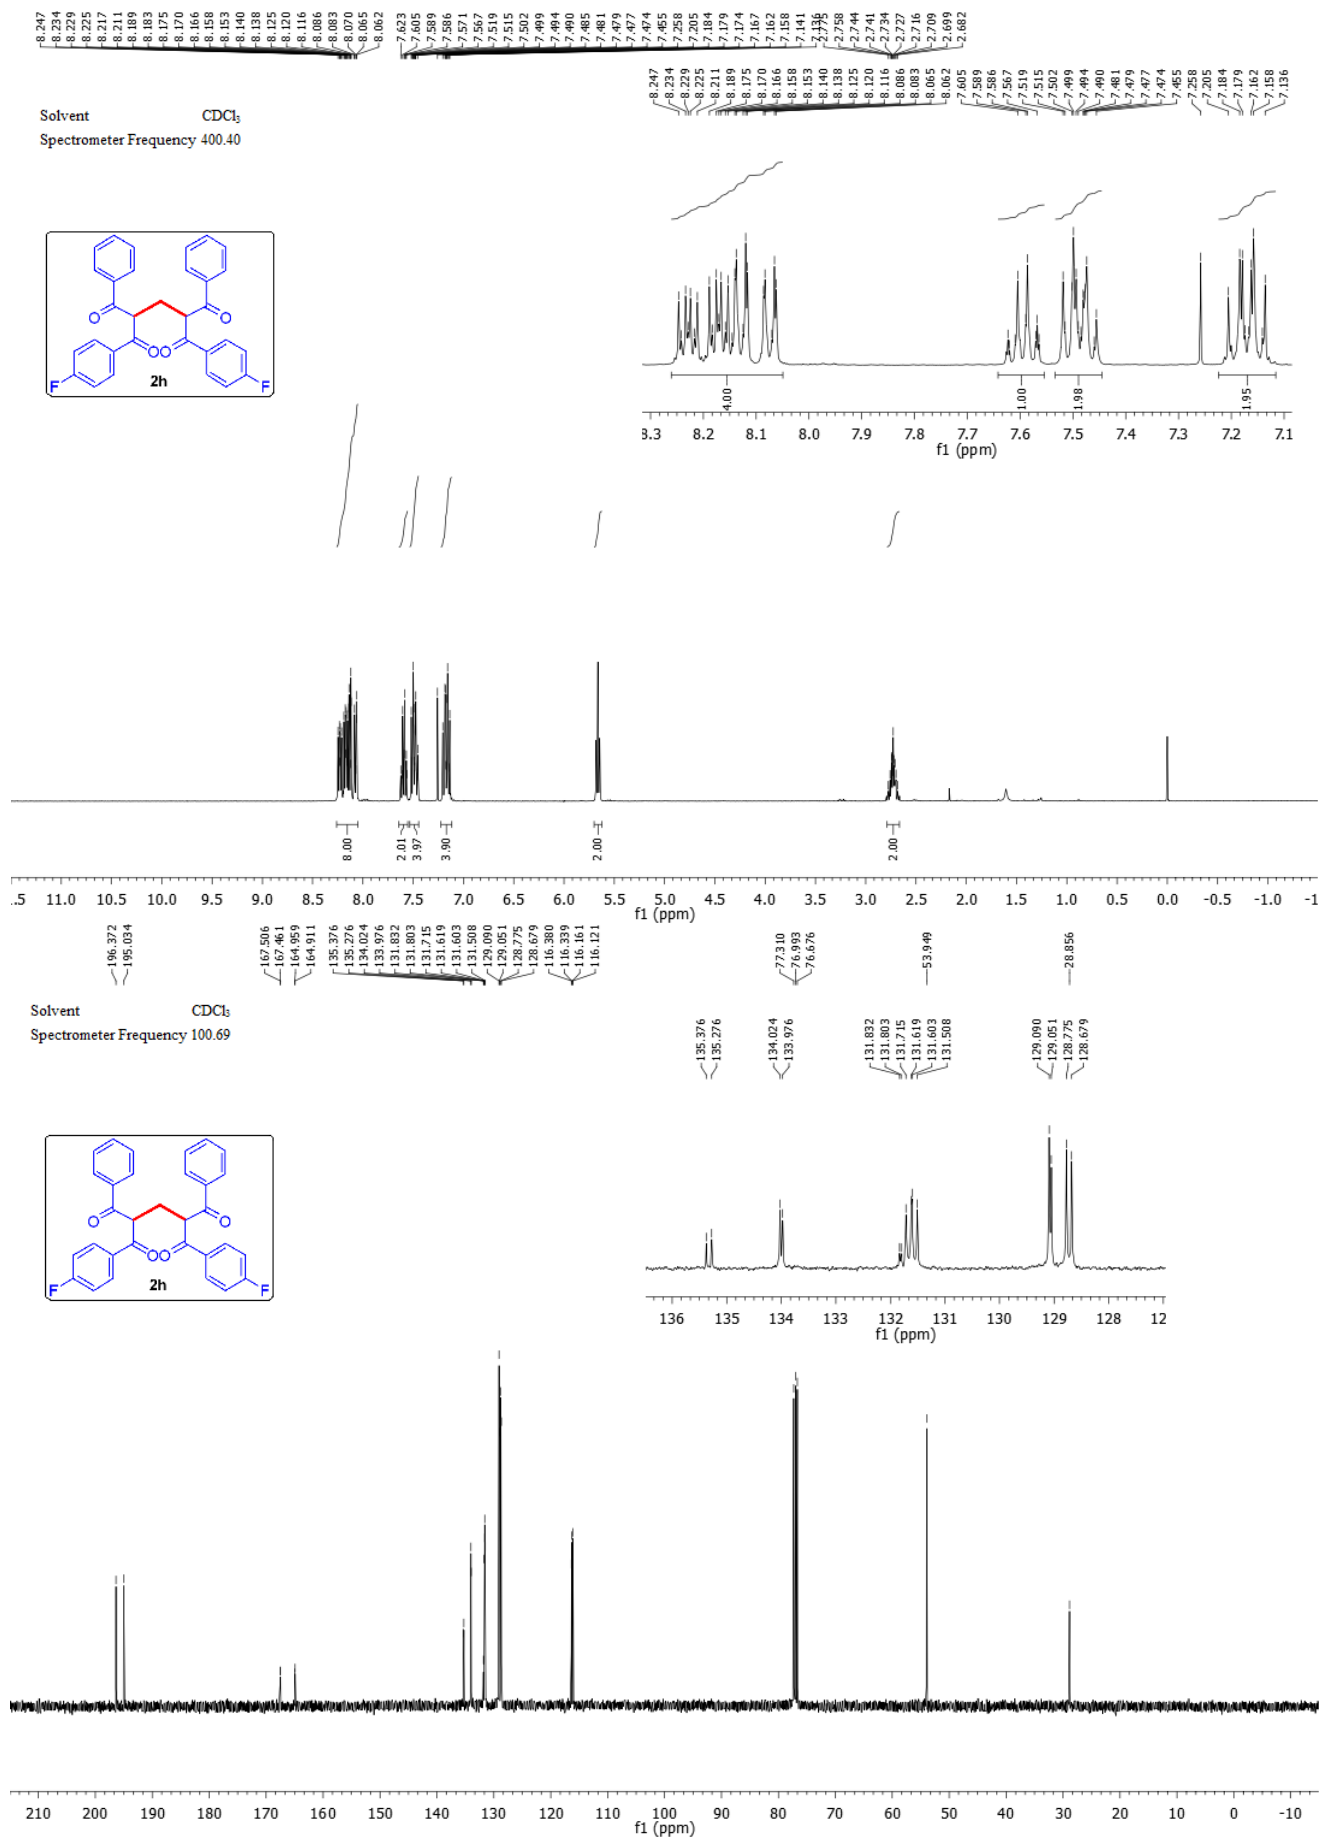





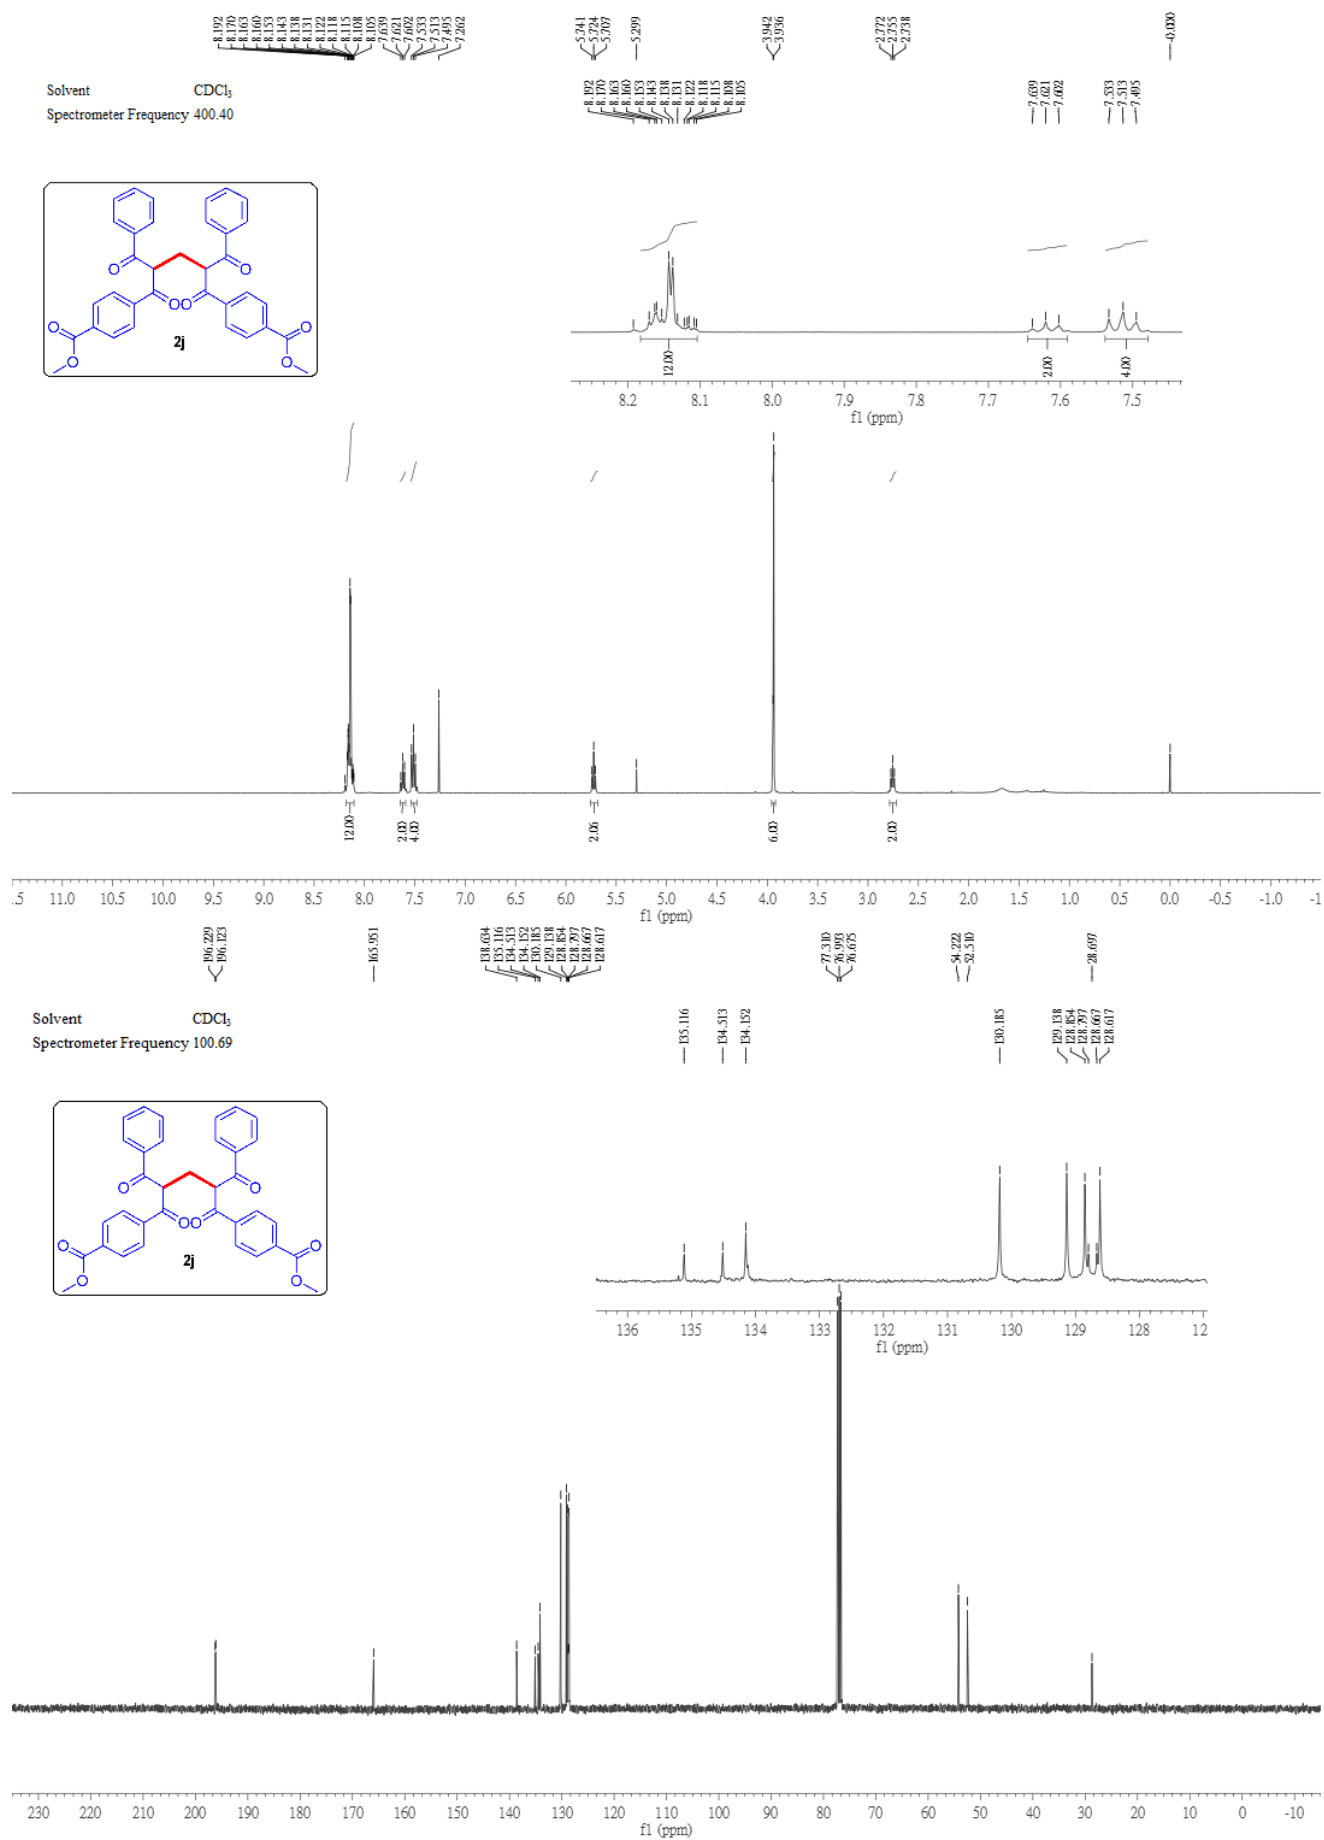

0.000

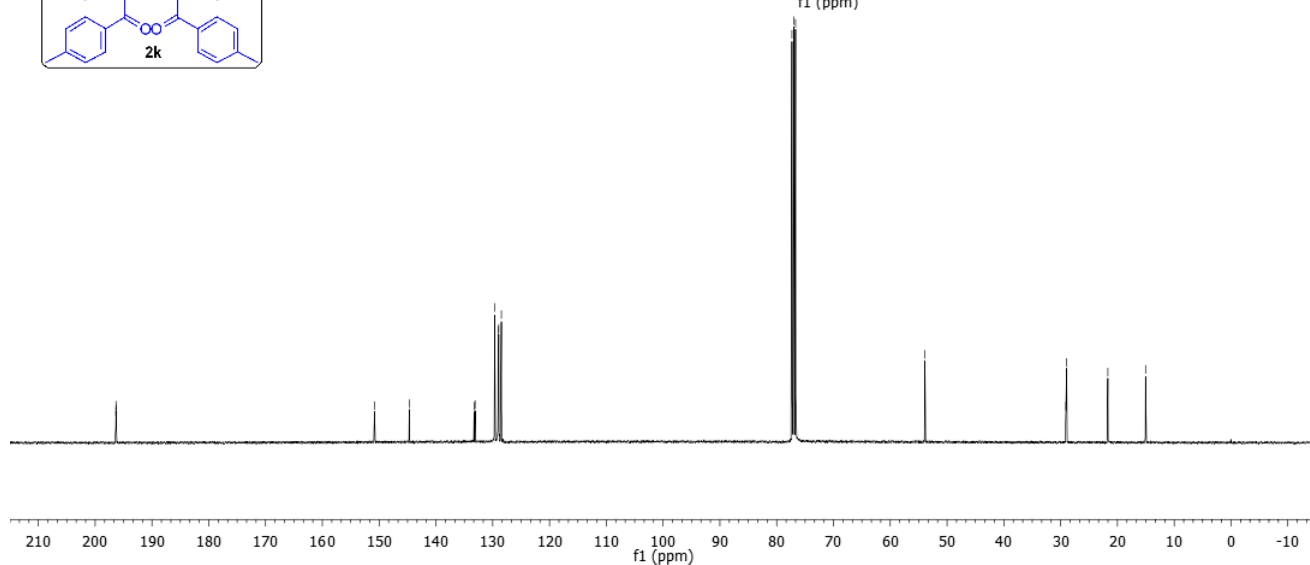

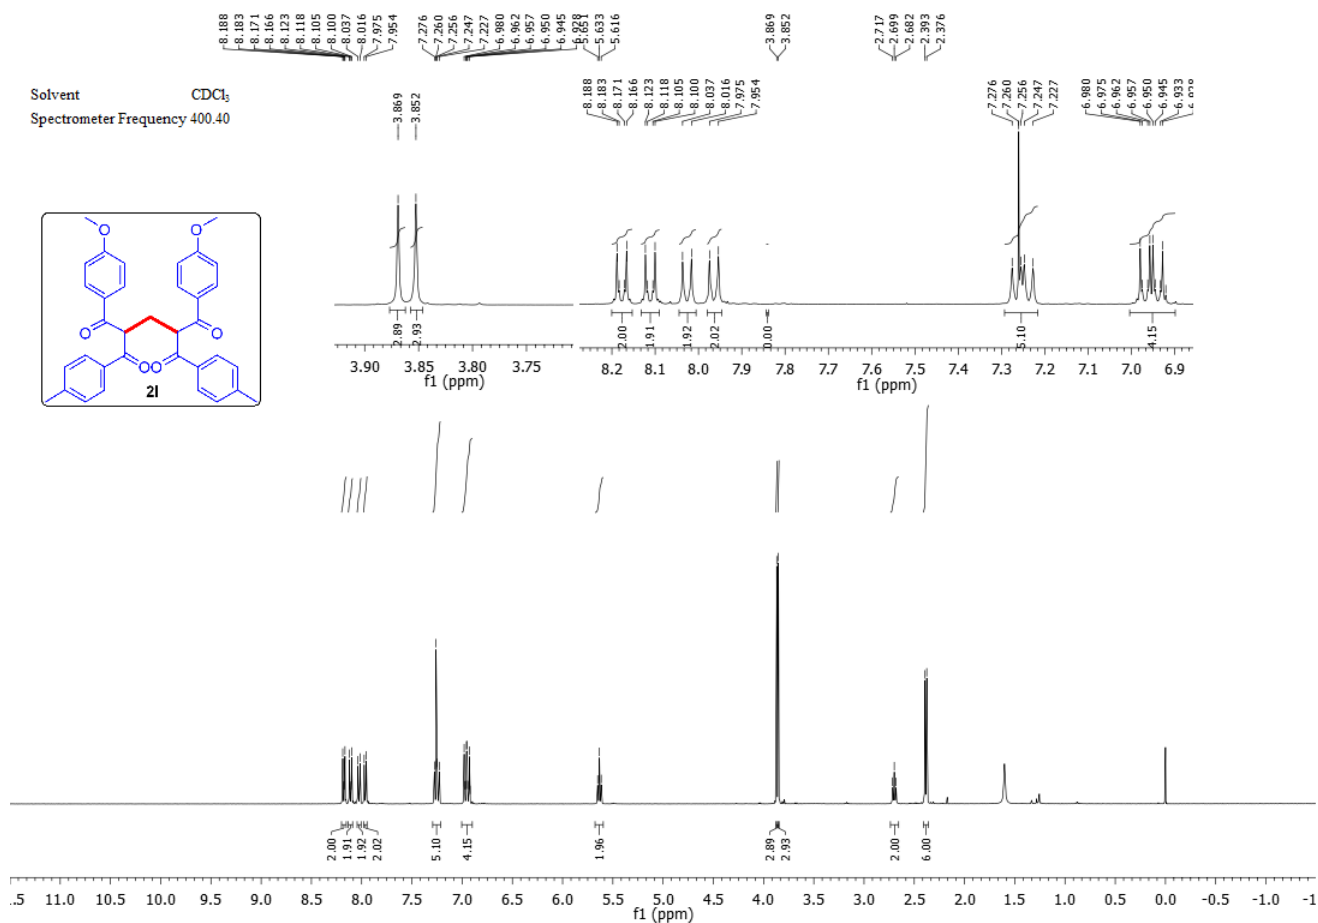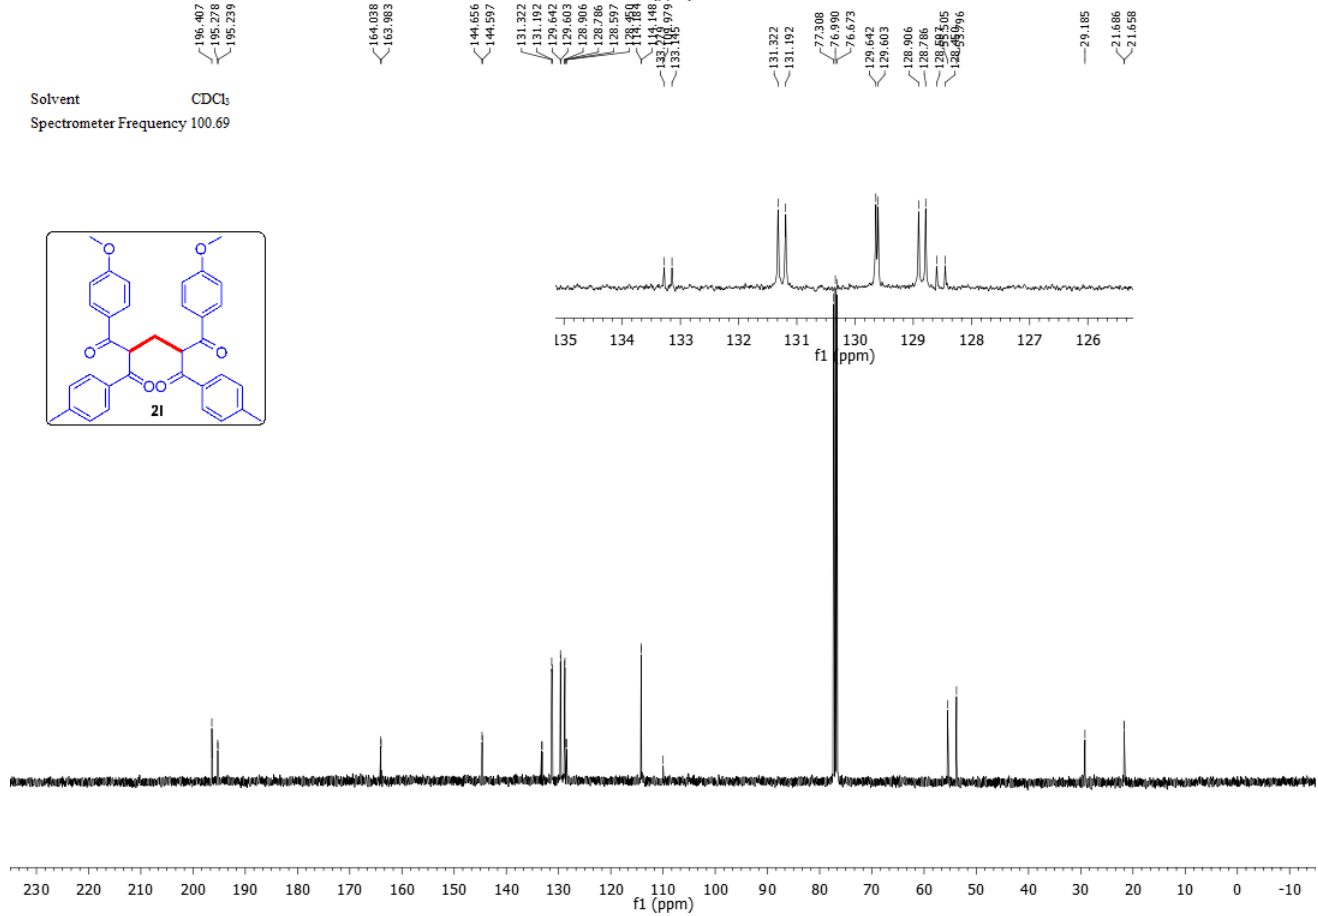

Solvent  $\text{CDCl}_3$   
Spectrometer Frequency 400.40

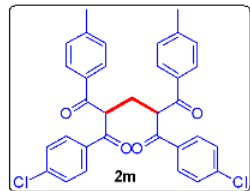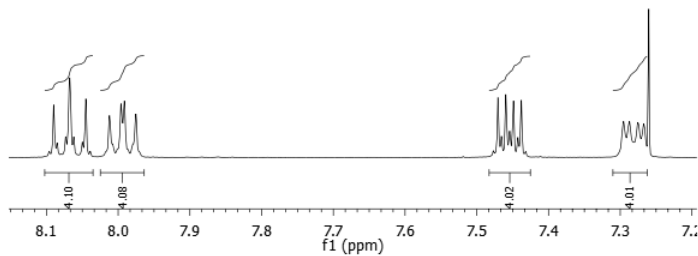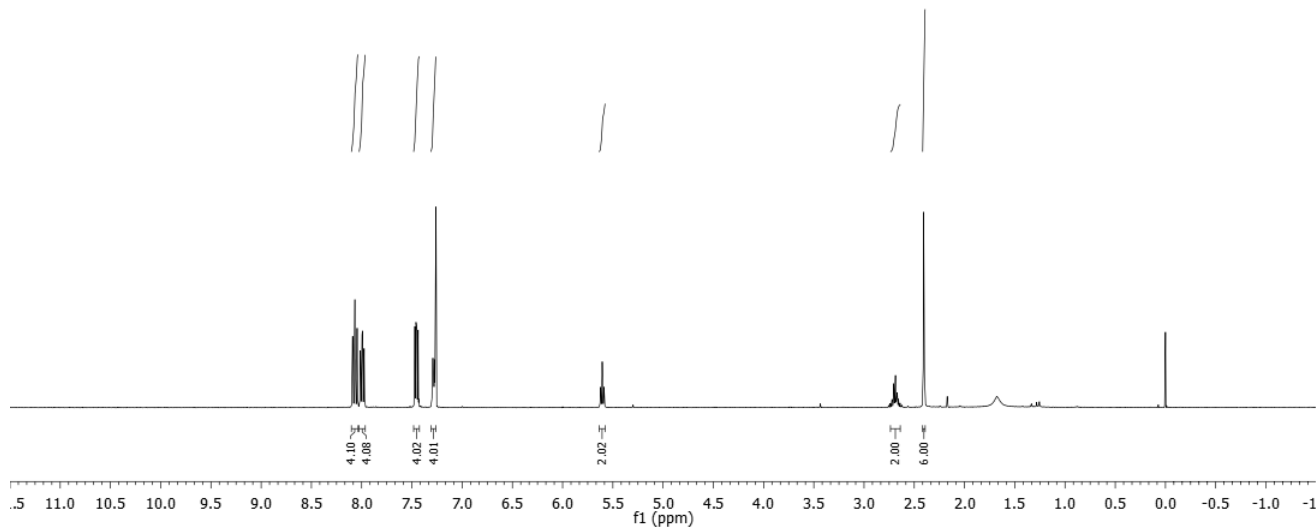

Solvent  $\text{CDCl}_3$   
Spectrometer Frequency 100.69

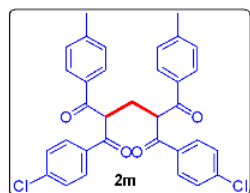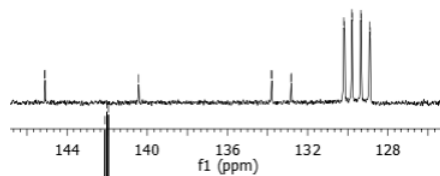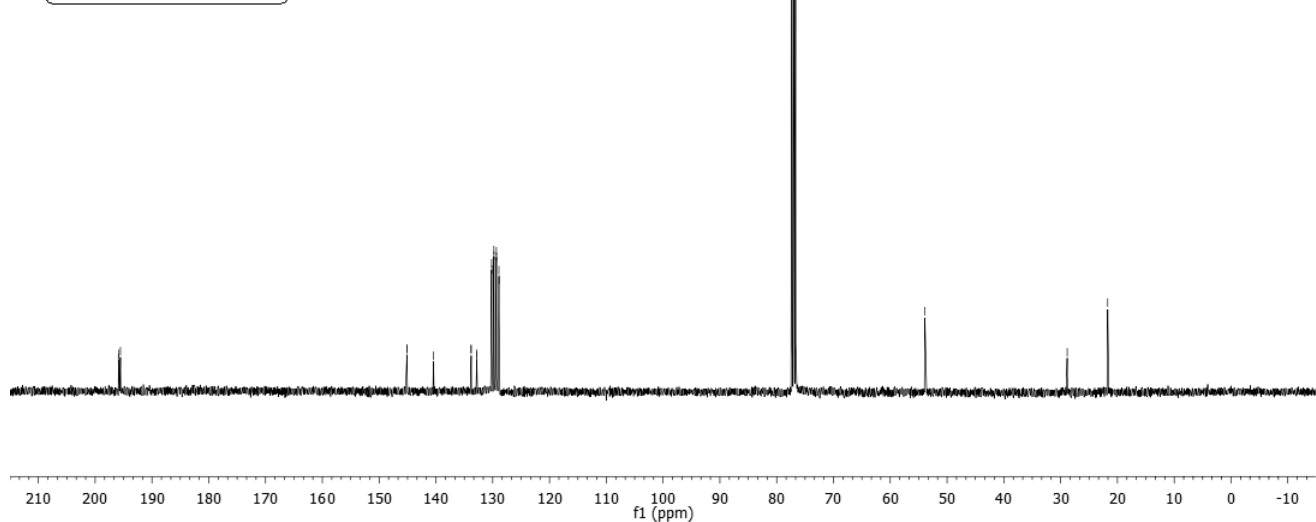

Solvent  $\text{CDCl}_3$   
Spectrometer Frequency 400.40

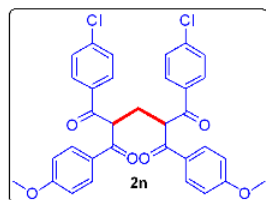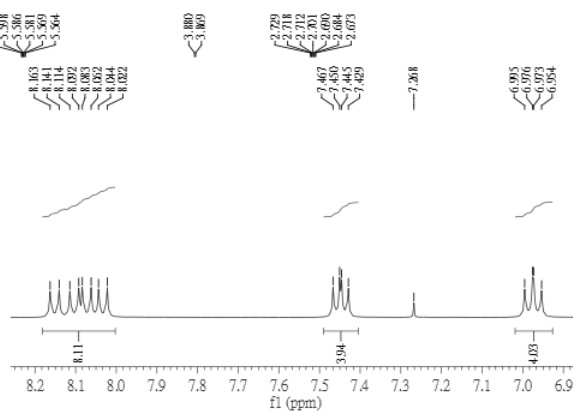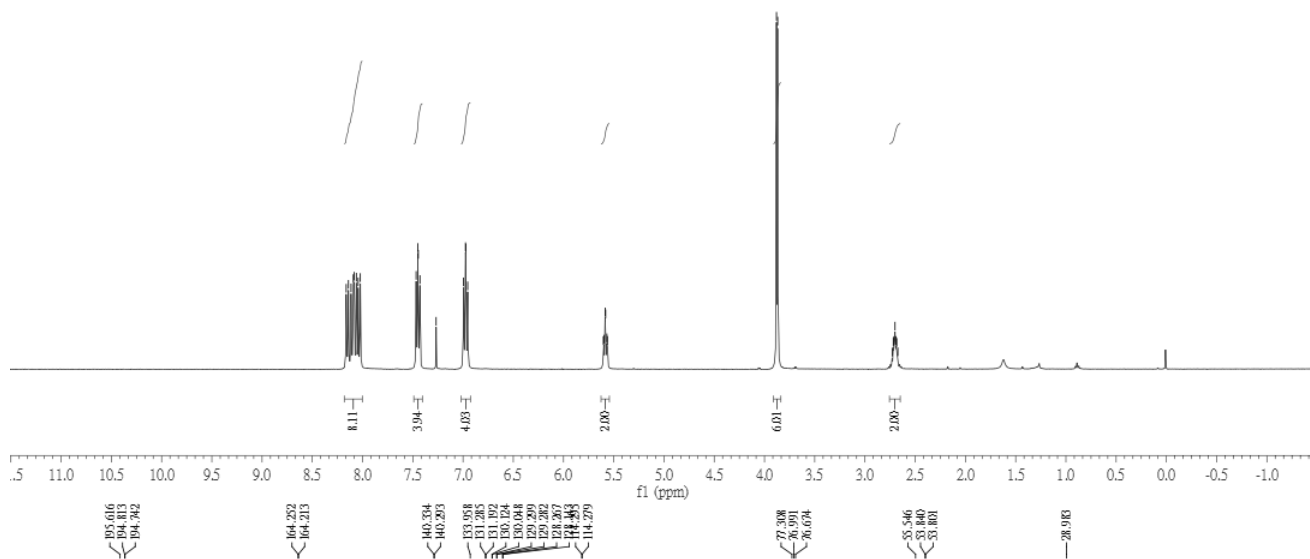

Solvent  $\text{CDCl}_3$   
Spectrometer Frequency 100.69

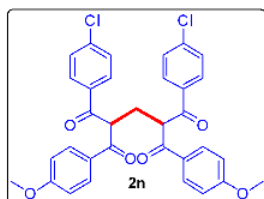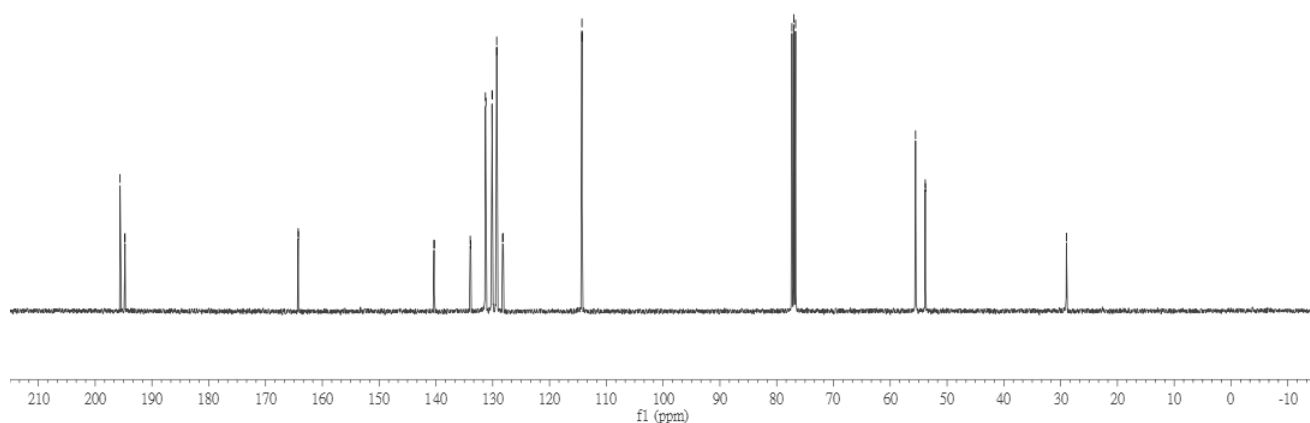

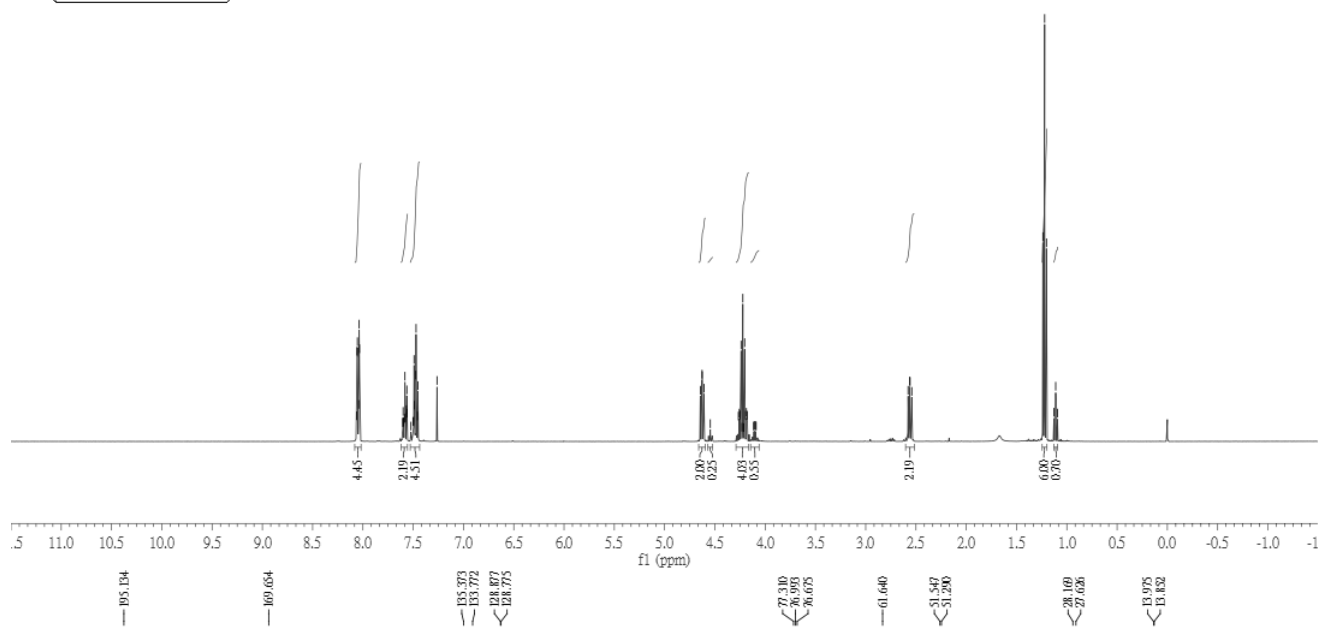

Chemical structure of compound **2o**, which is 1,3-bis(phenylthio)butane. It features a central butane chain with phenyl groups attached to the 1 and 3 positions.

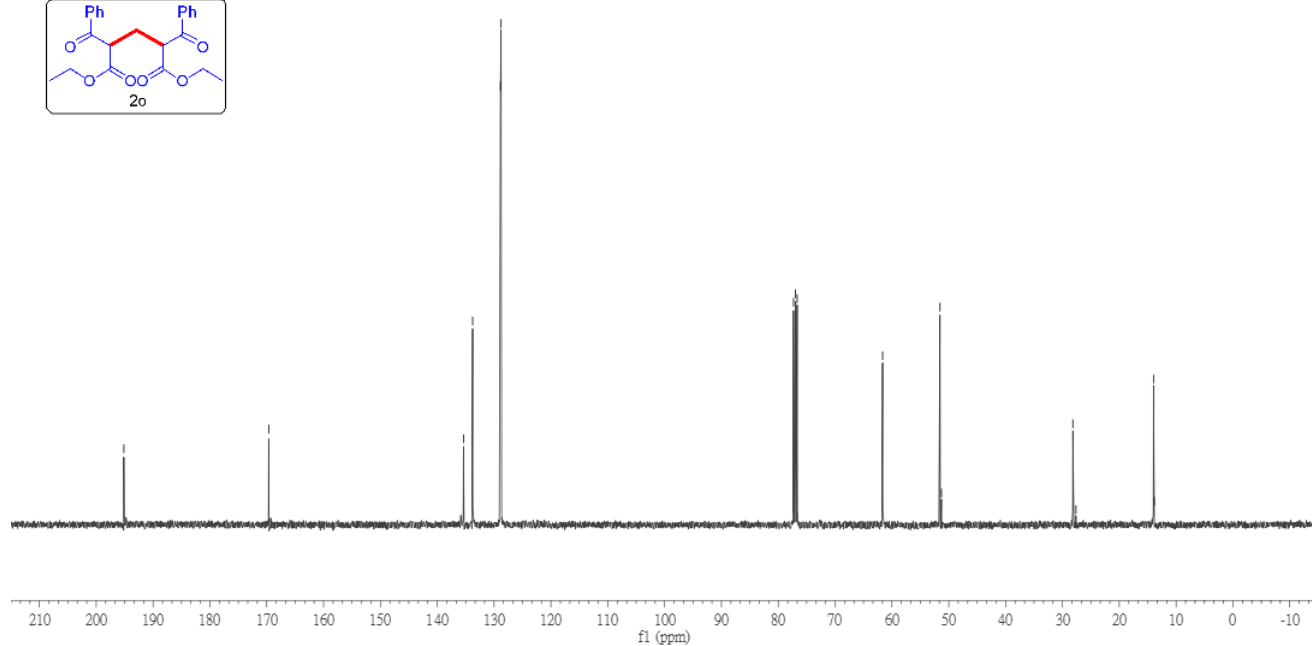

Solvent  $\text{CDCl}_3$   
Spectrometer Frequency 400.40

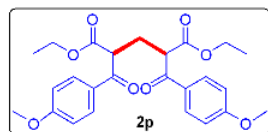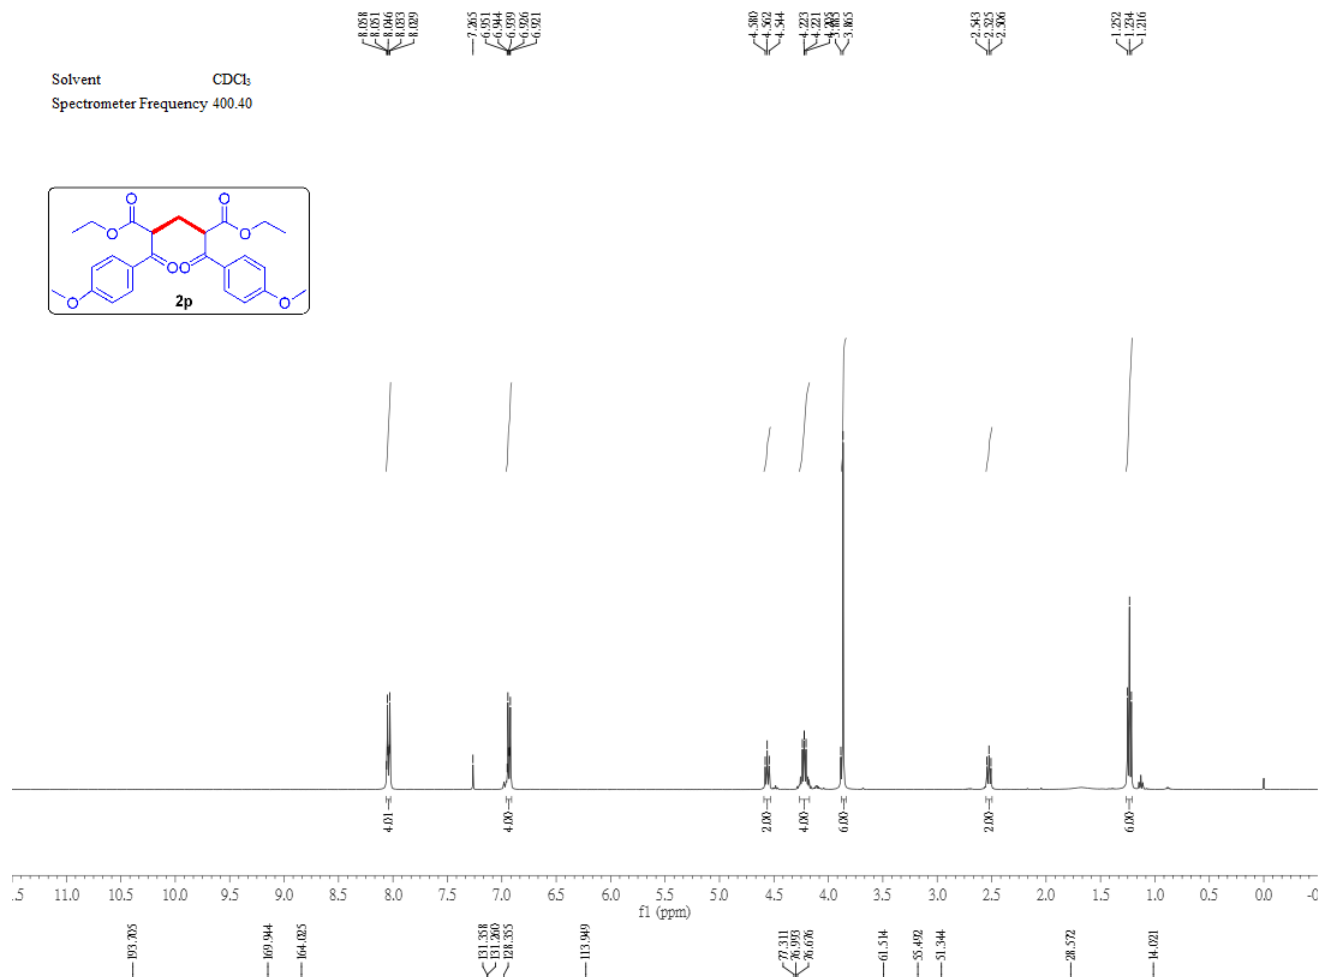

Solvent  $\text{CDCl}_3$   
Spectrometer Frequency 100.69

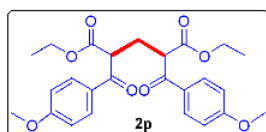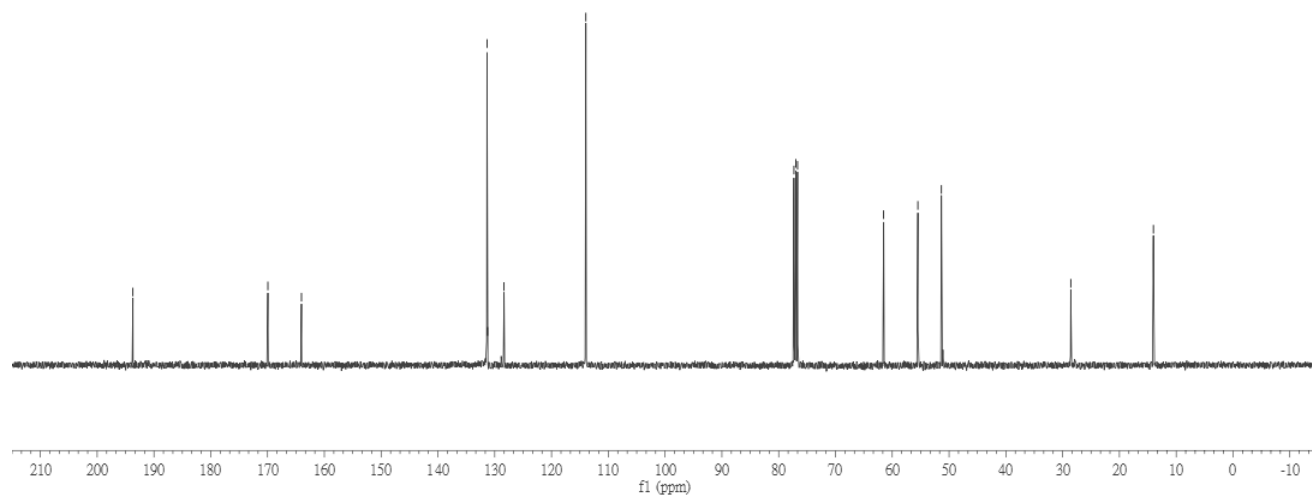

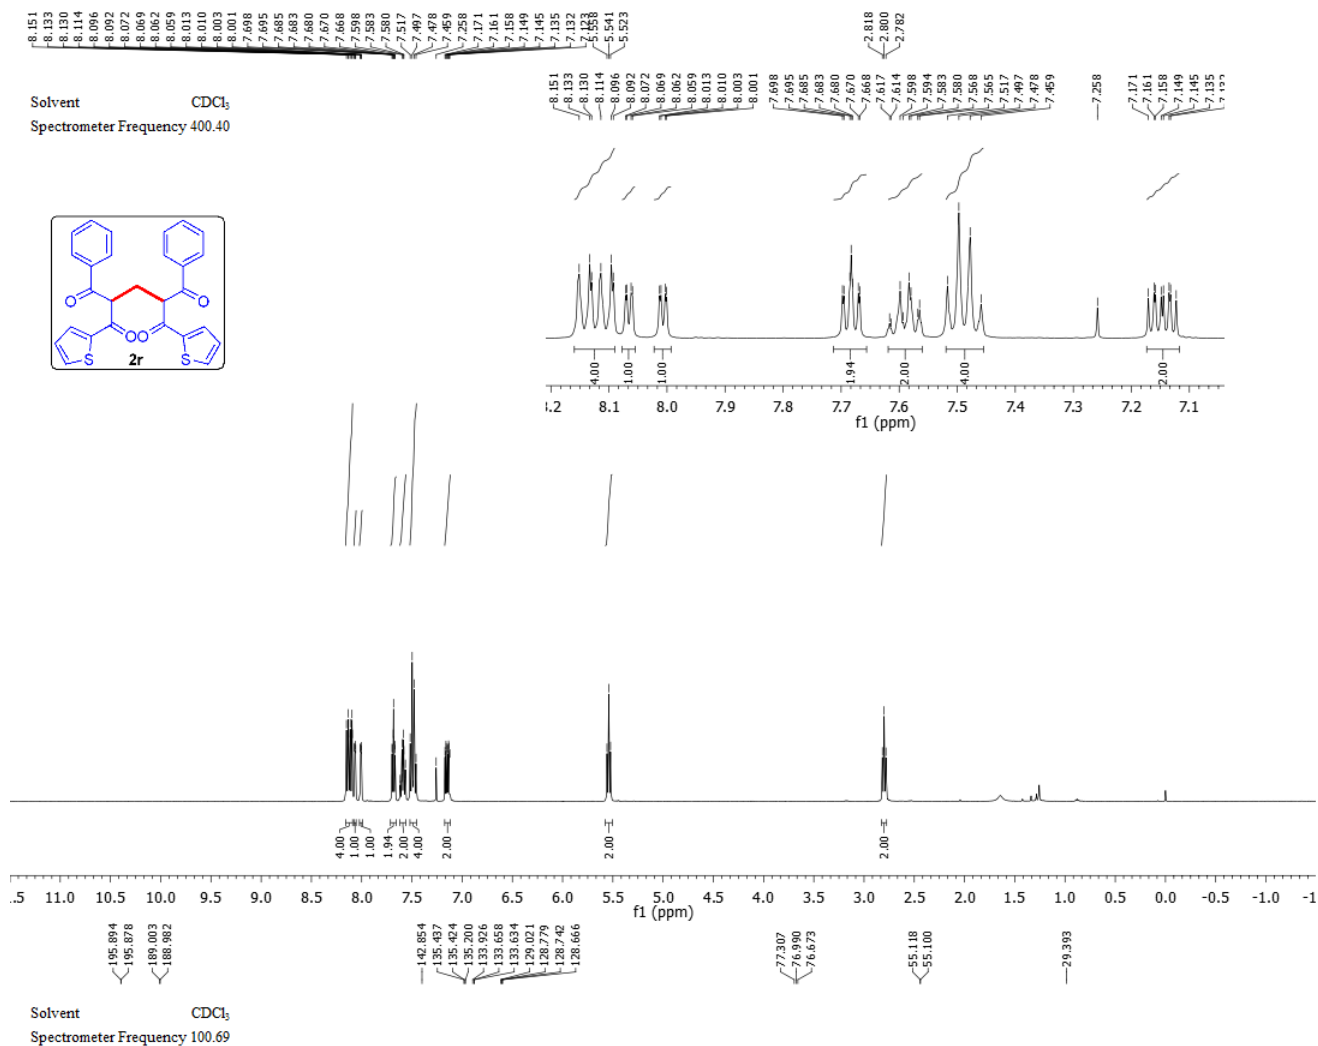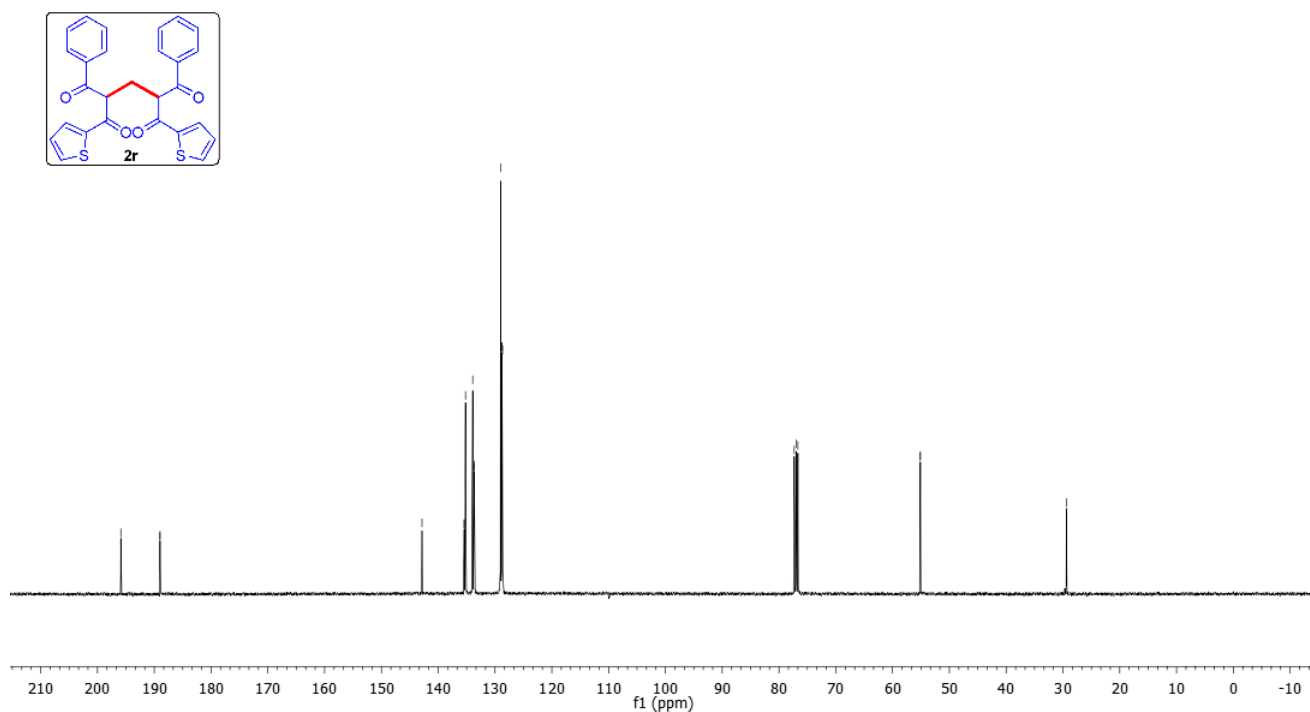



Solvent  $\text{CDCl}_3$   
Spectrometer Frequency 400.40  
Nucleus  $^1\text{H}$

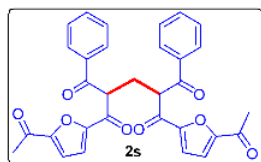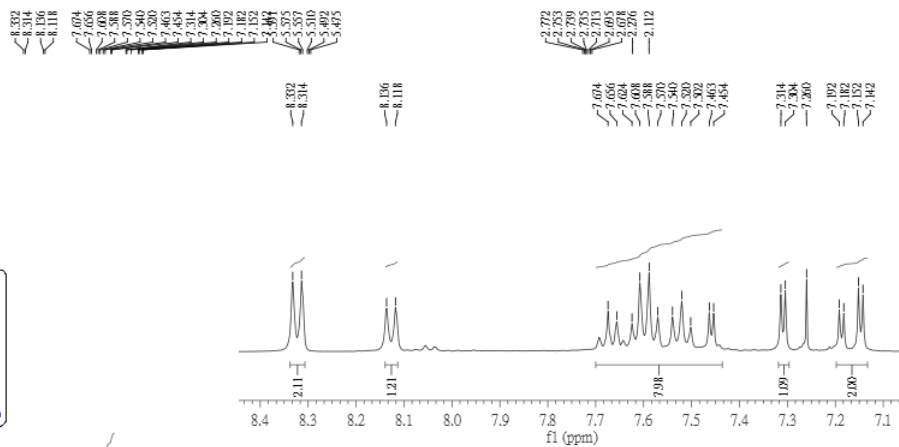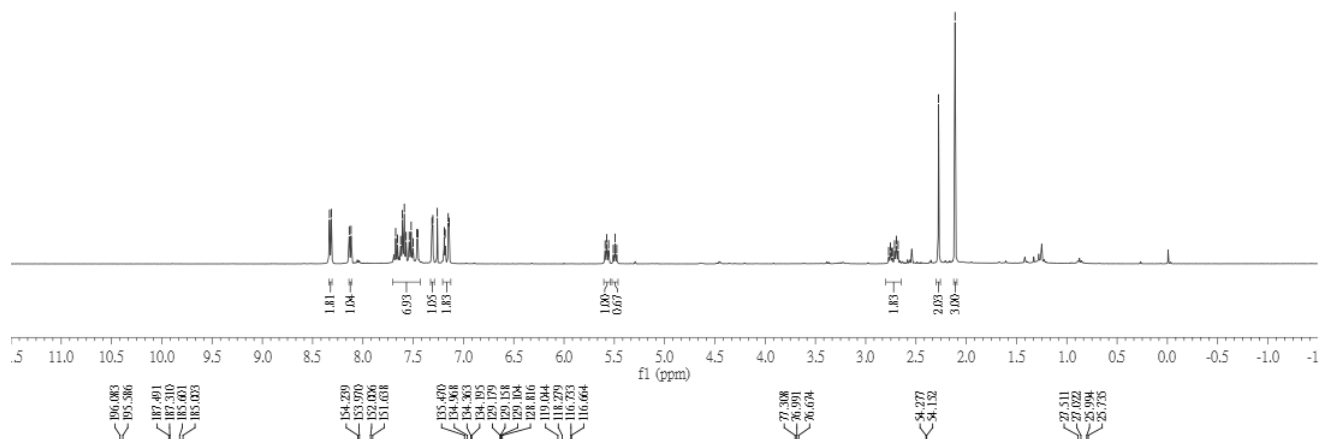

Solvent  $\text{CDCl}_3$   
Spectrometer Frequency 100.69  
Nucleus  $^{13}\text{C}$

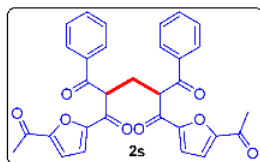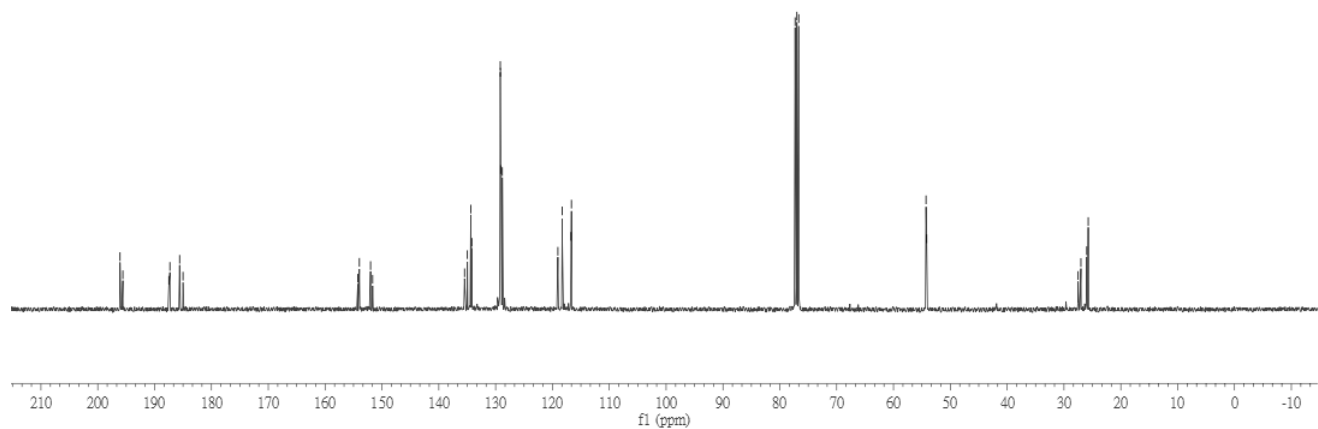

Solvent  $\text{CDCl}_3$   
Spectrometer Frequency 400.40  
Nucleus  $^1\text{H}$

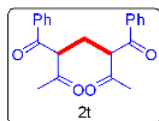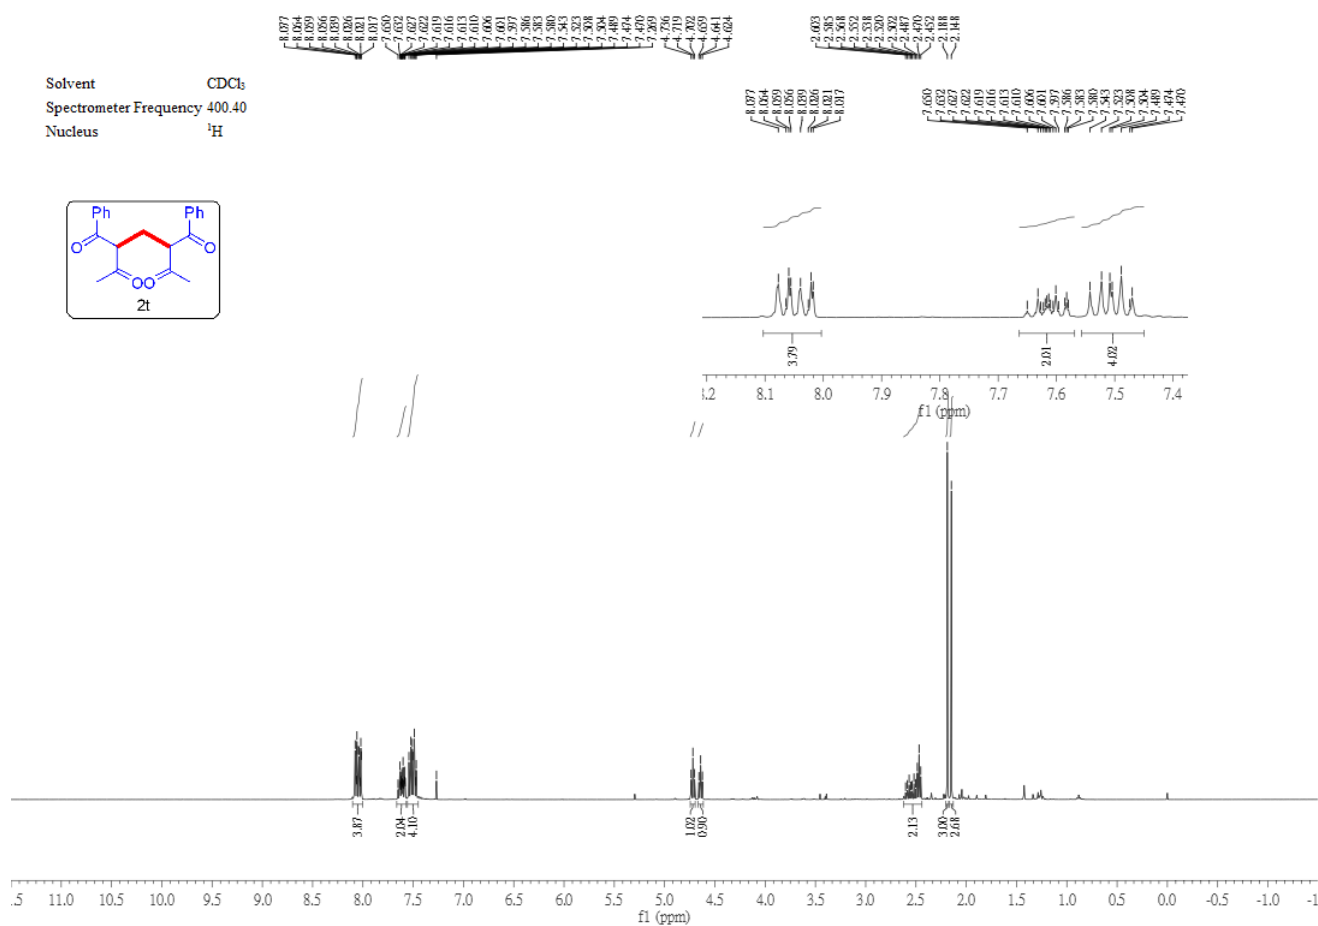

Solvent  $\text{CDCl}_3$   
Spectrometer Frequency 100.69  
Nucleus  $^{13}\text{C}$

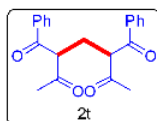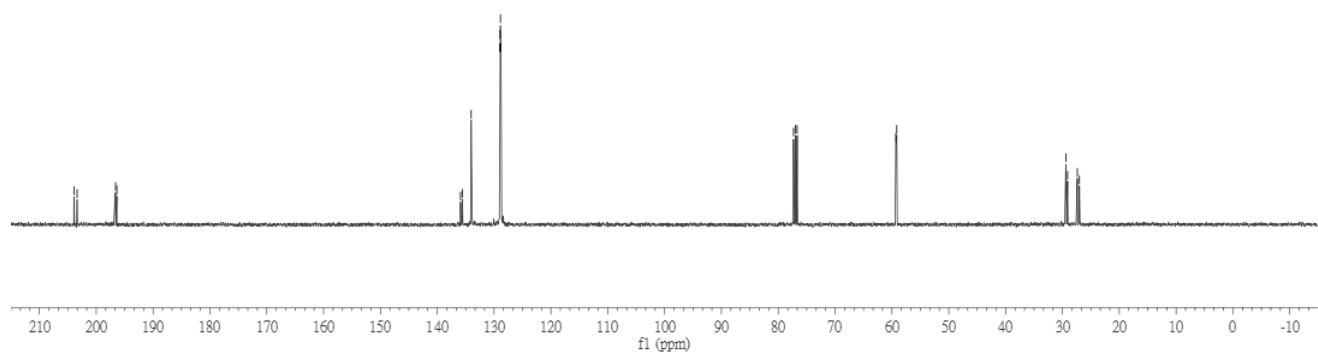

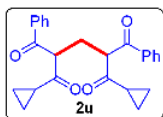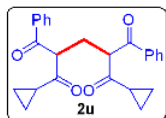

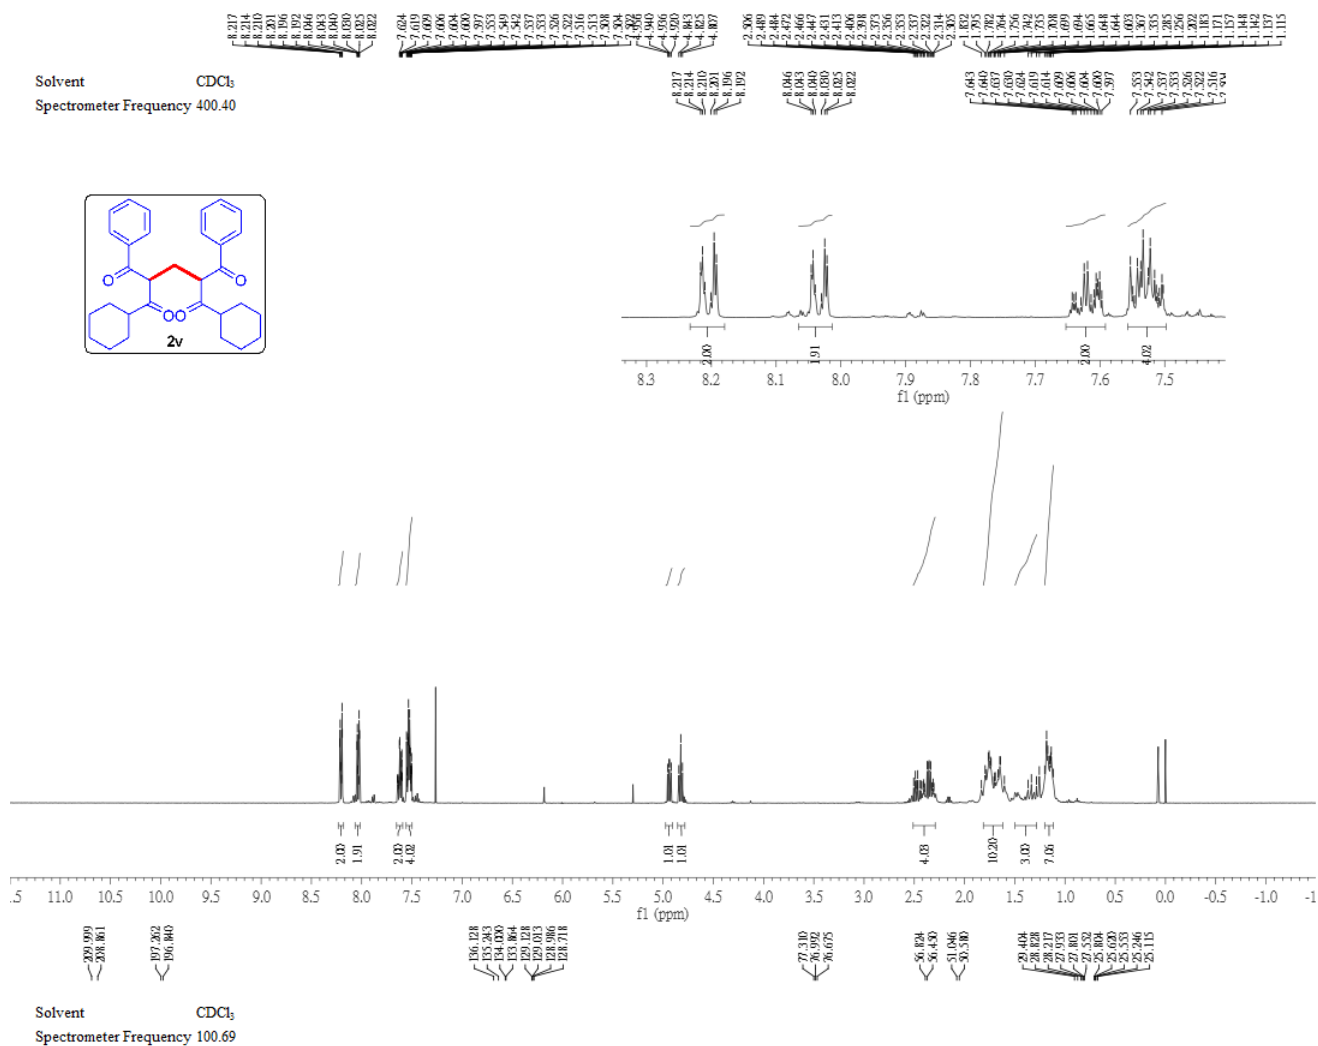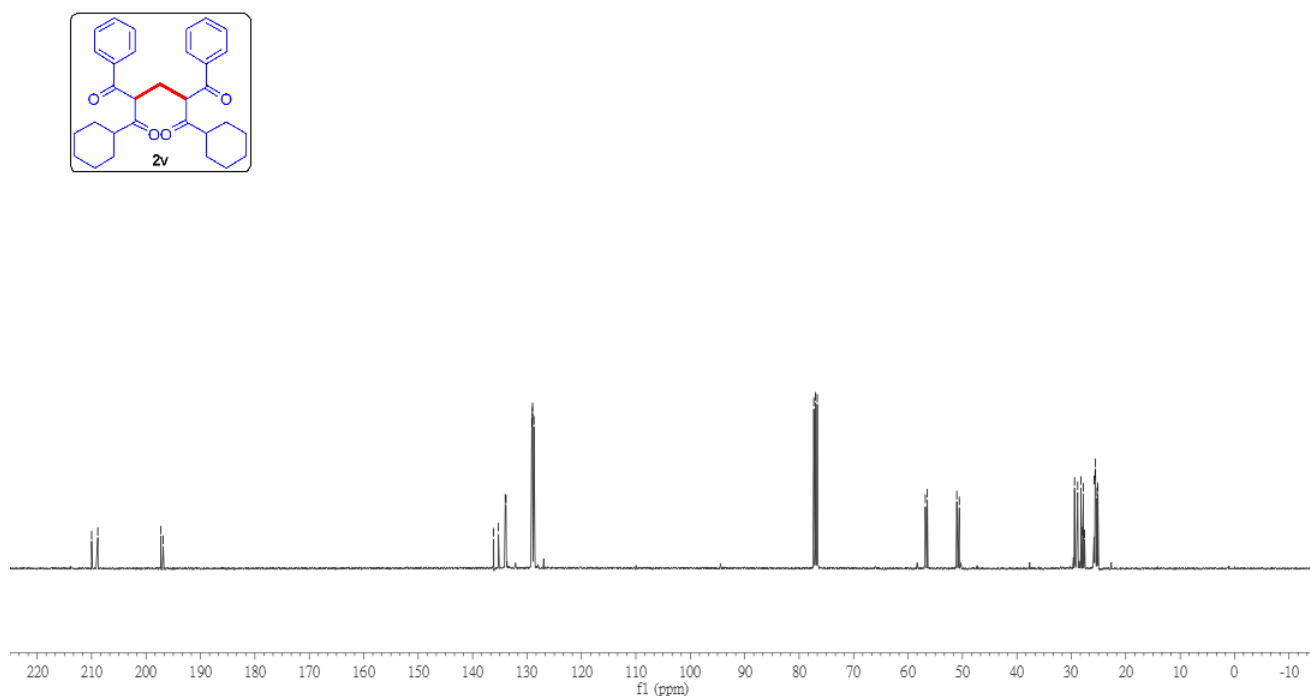

Chemical structure of 2w: Oc1ccccc1O.Oc2ccccc2O.O=C1C=CC(=O)OC1=O

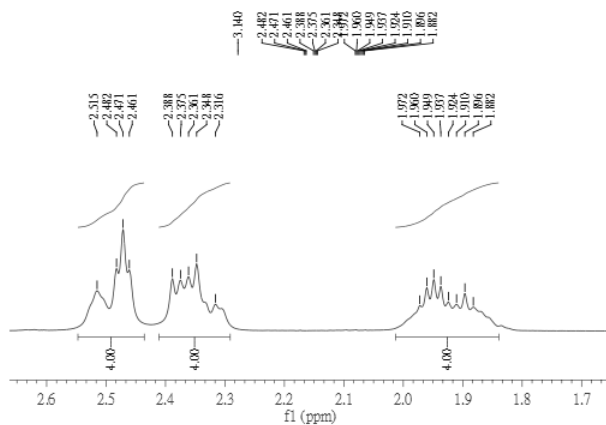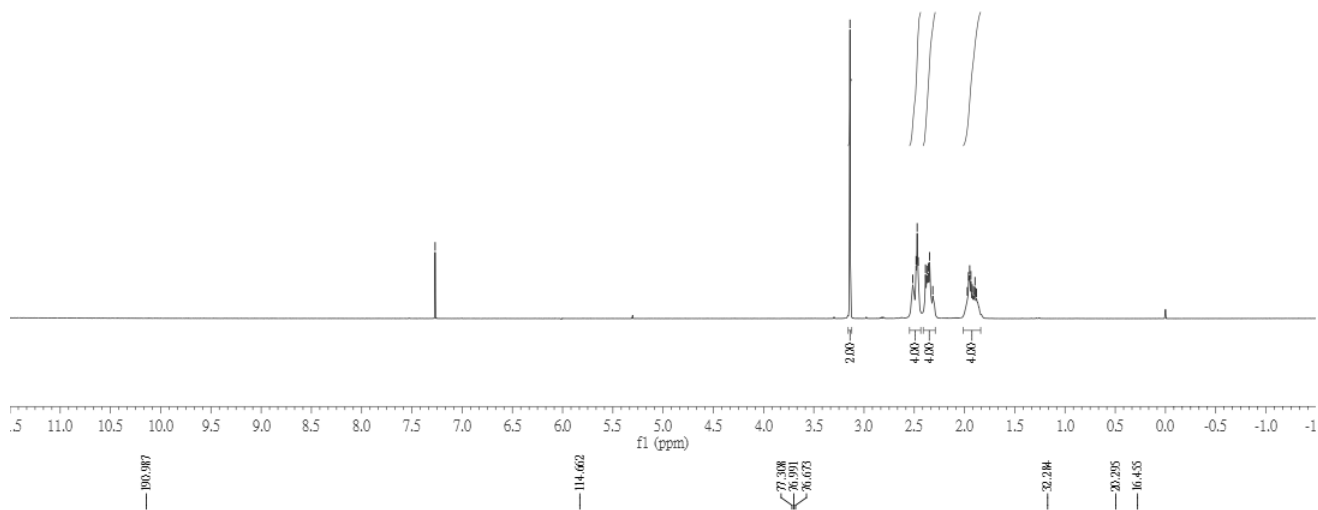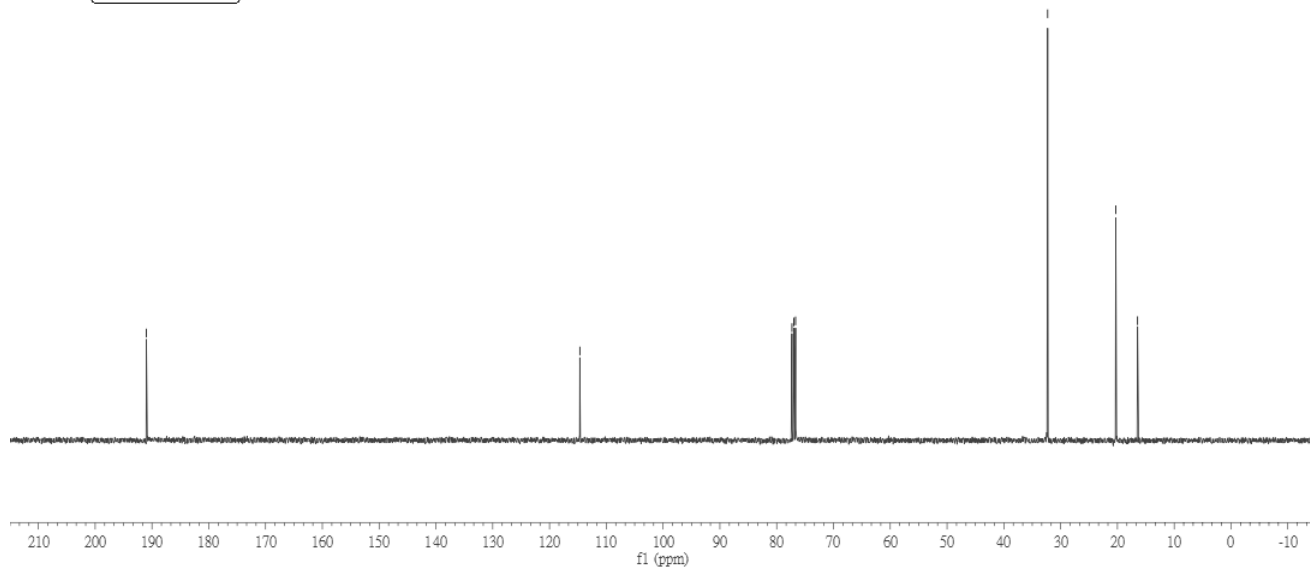

[illegible]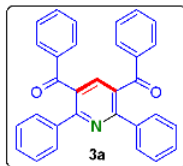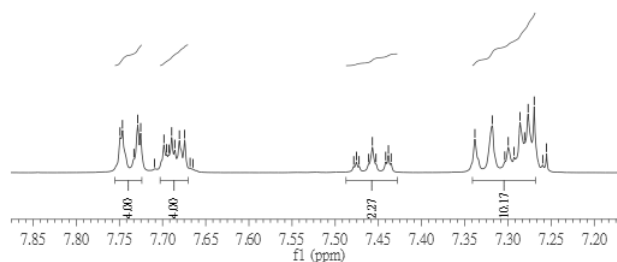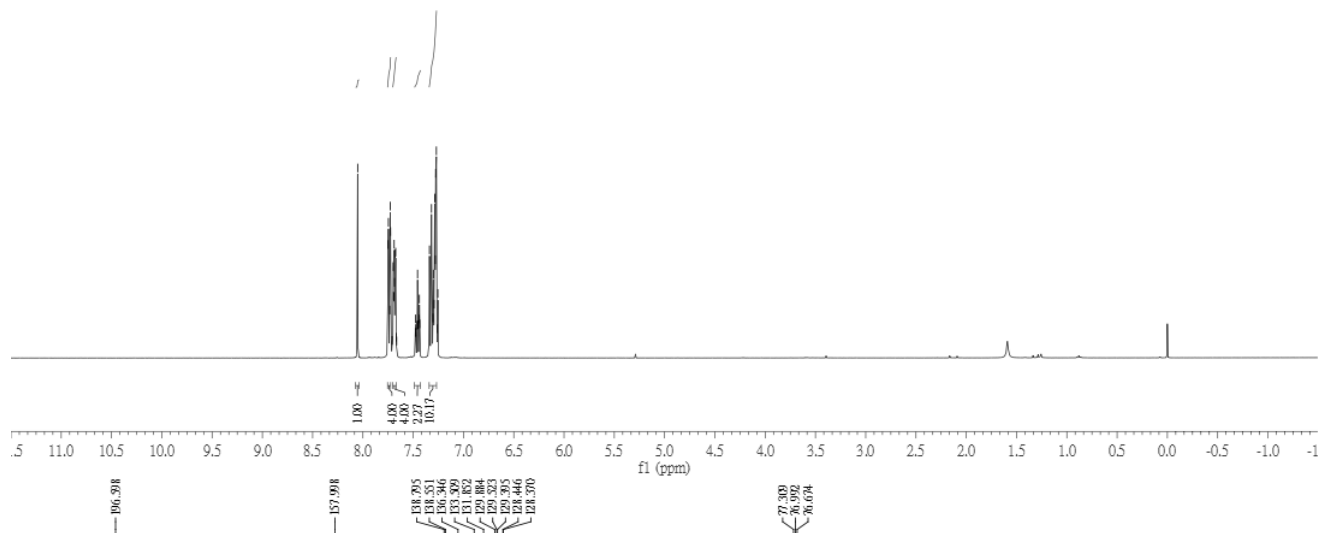

— 134,295  
— 134,551

— 136,346

— 133,309

— 131,852

— 129,884  
— 129,523  
— 129,395

— 128,446  
— 128,370

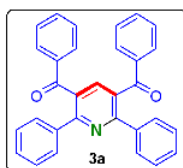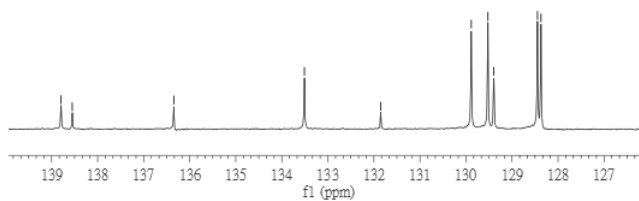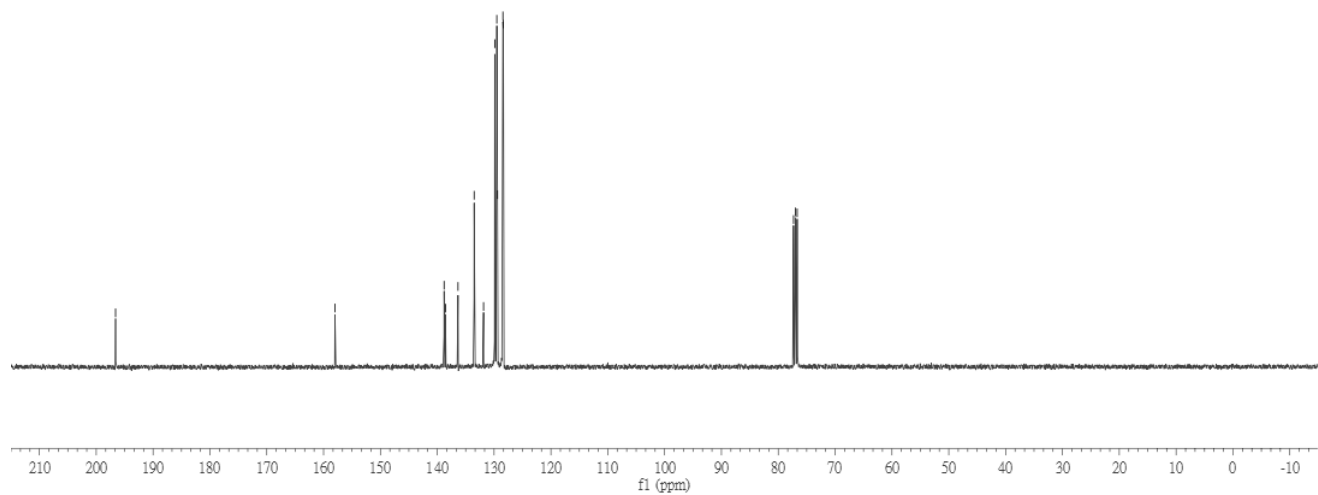

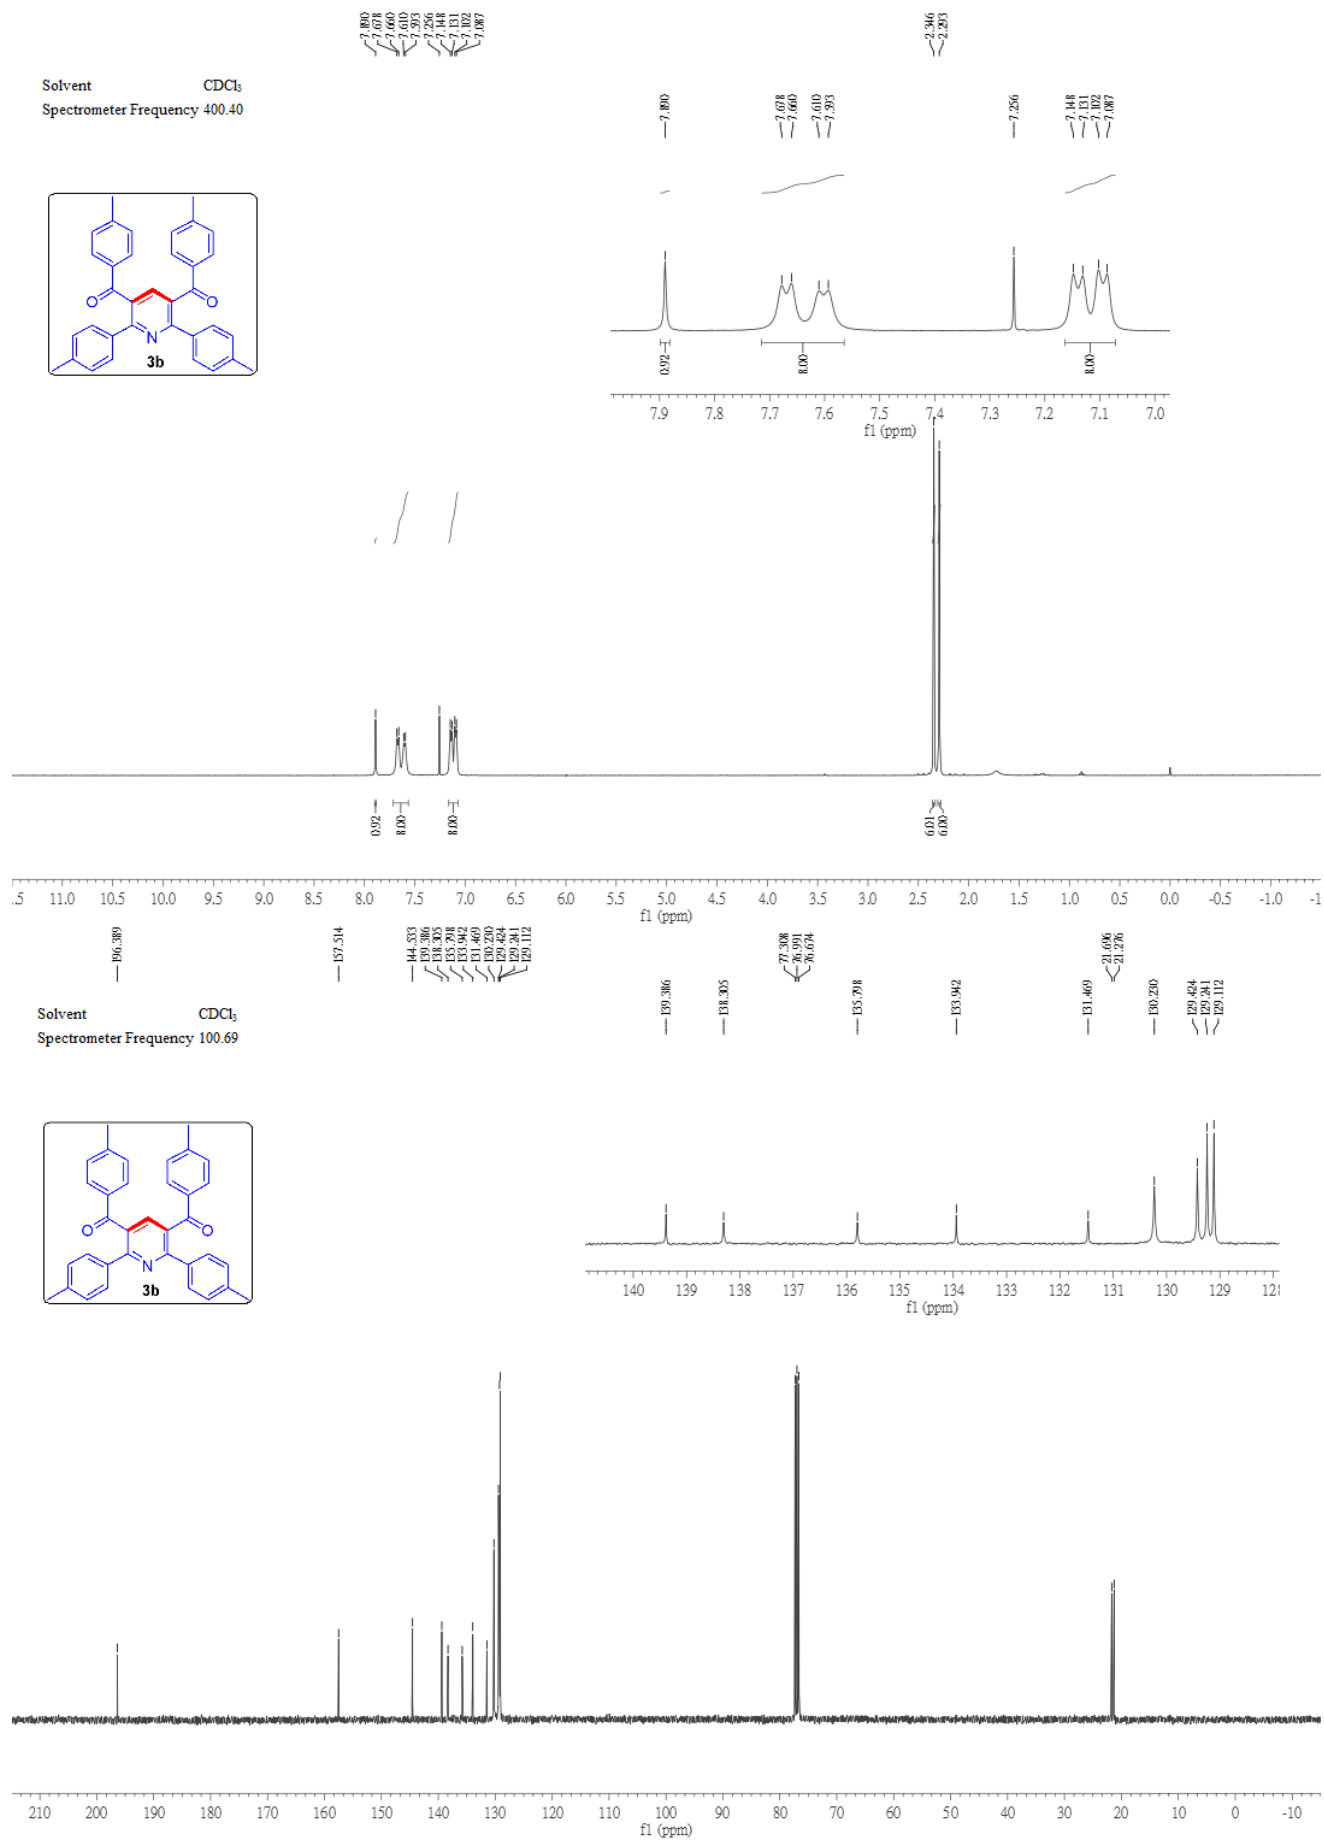

Solvent  $\text{CDCl}_3$   
Spectrometer Frequency 400.40  
Nucleus  $^1\text{H}$

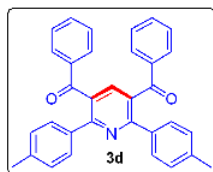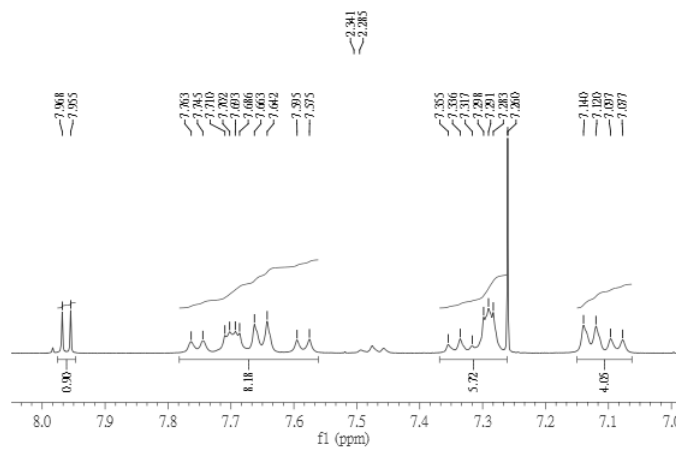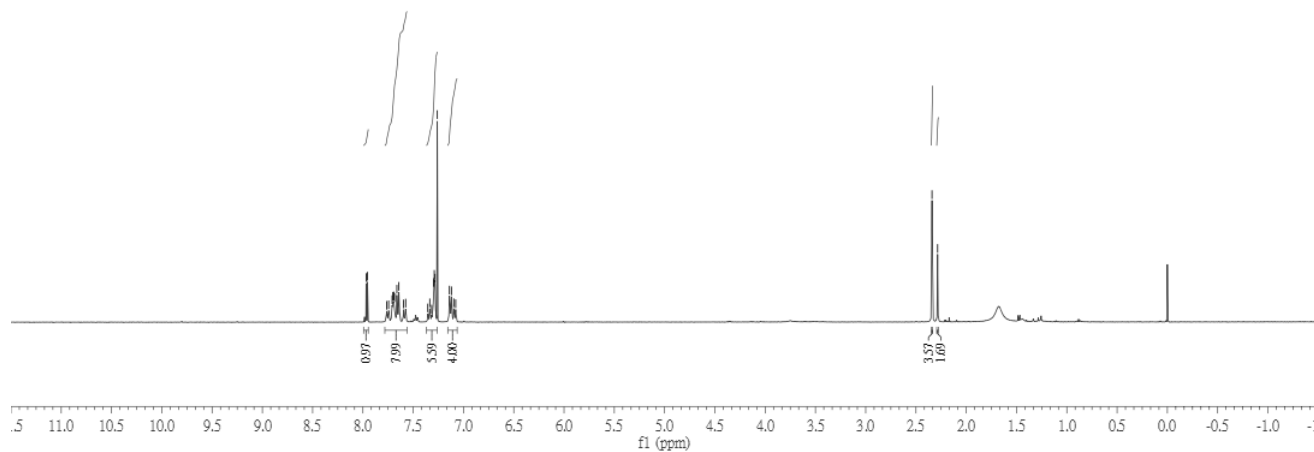

Solvent  $\text{CDCl}_3$   
Spectrometer Frequency 100.69  
Nucleus  $^{13}\text{C}$

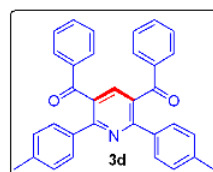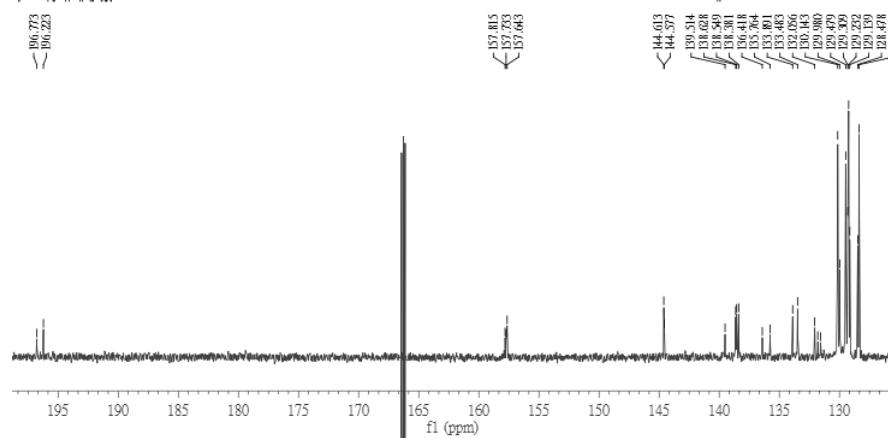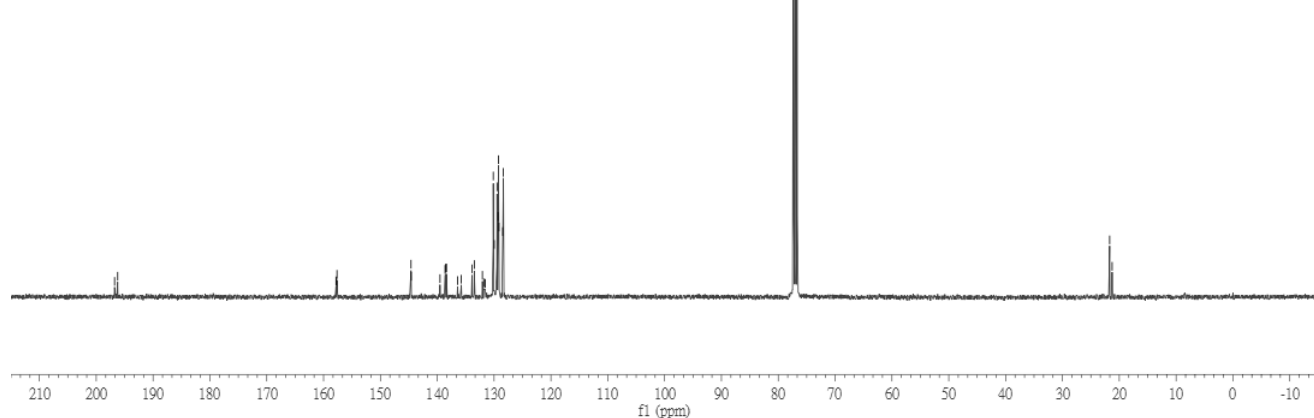



Solvent  $\text{CDCl}_3$   
Spectrometer Frequency 400.40

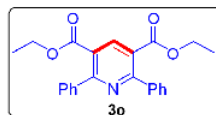

7.641  
7.635  
7.629  
7.626  
7.623  
7.617  
7.615  
7.618  
7.613  
7.608  
7.599

7.253  
7.215  
7.197  
7.179

7.641  
7.635  
7.629  
7.626  
7.623  
7.617  
7.615

1.119  
1.102  
1.084

7.445  
7.438  
7.433  
7.428

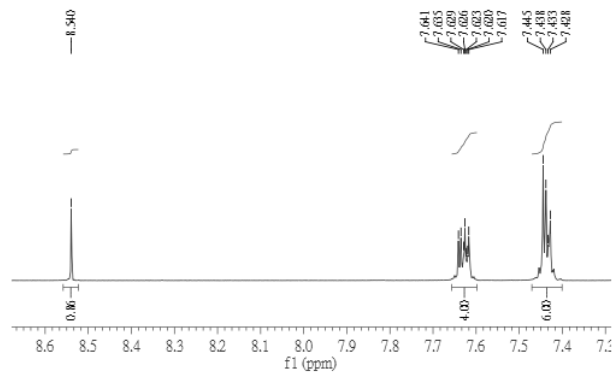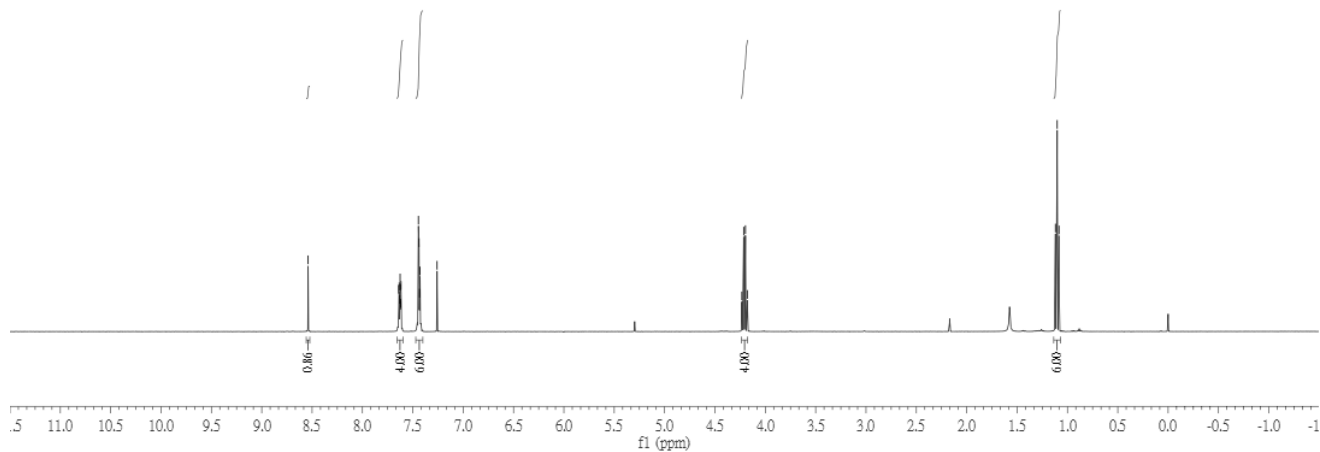

Solvent  $\text{CDCl}_3$   
Spectrometer Frequency 100.69

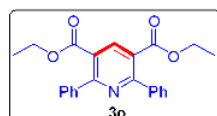

167.411

159.754

140.277

139.378

129.124

128.943

128.081

124.853

140.277

139.378

77.389

77.065

76.675

61.677

129.124

128.943

128.081

13.700

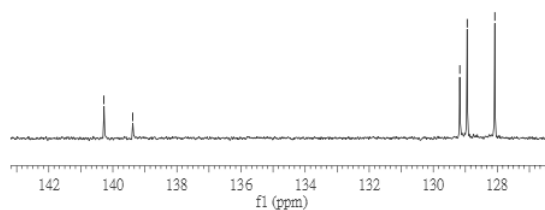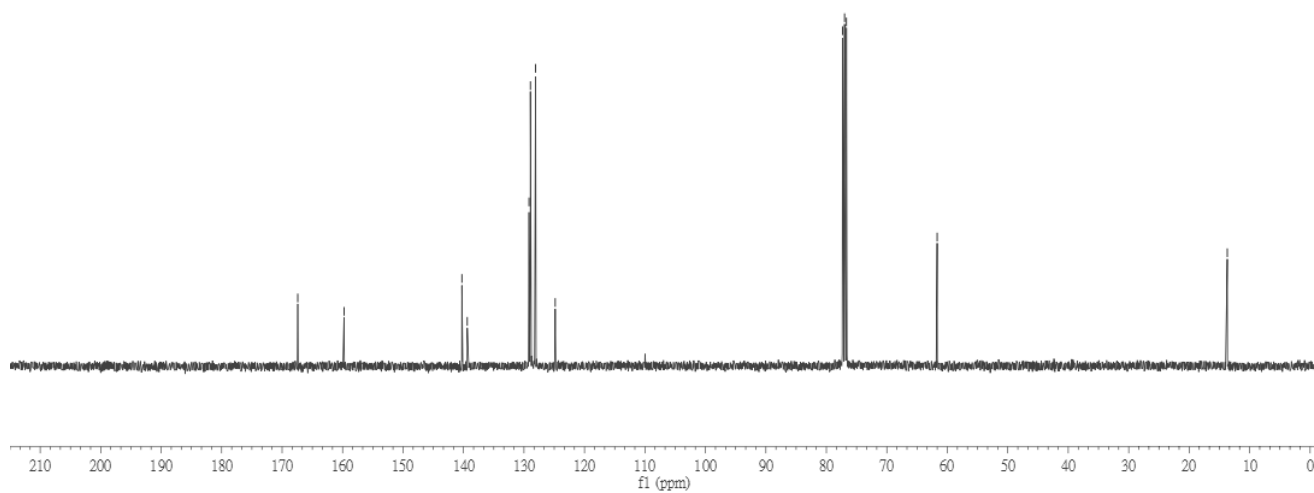

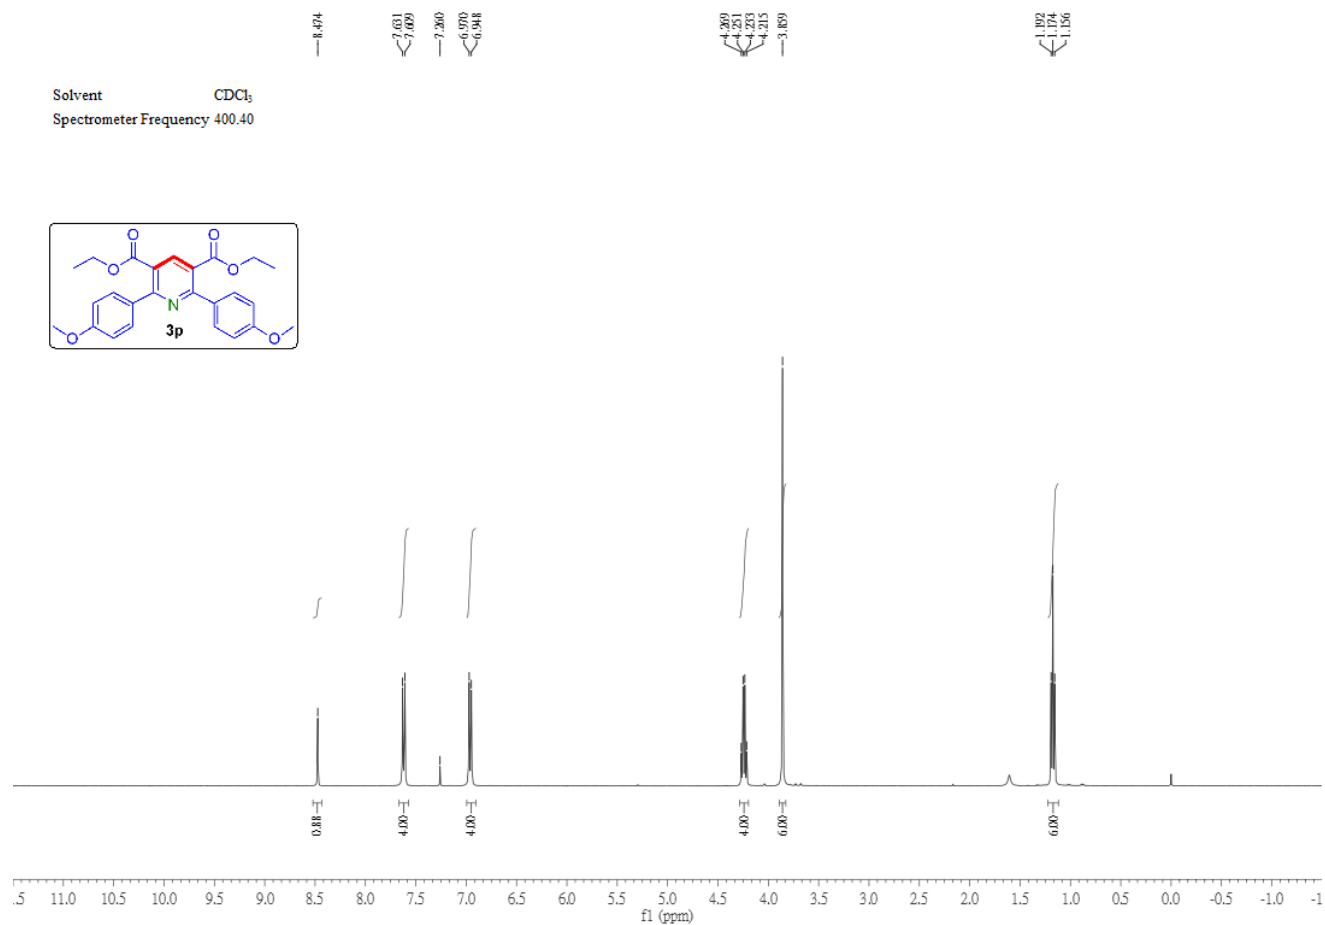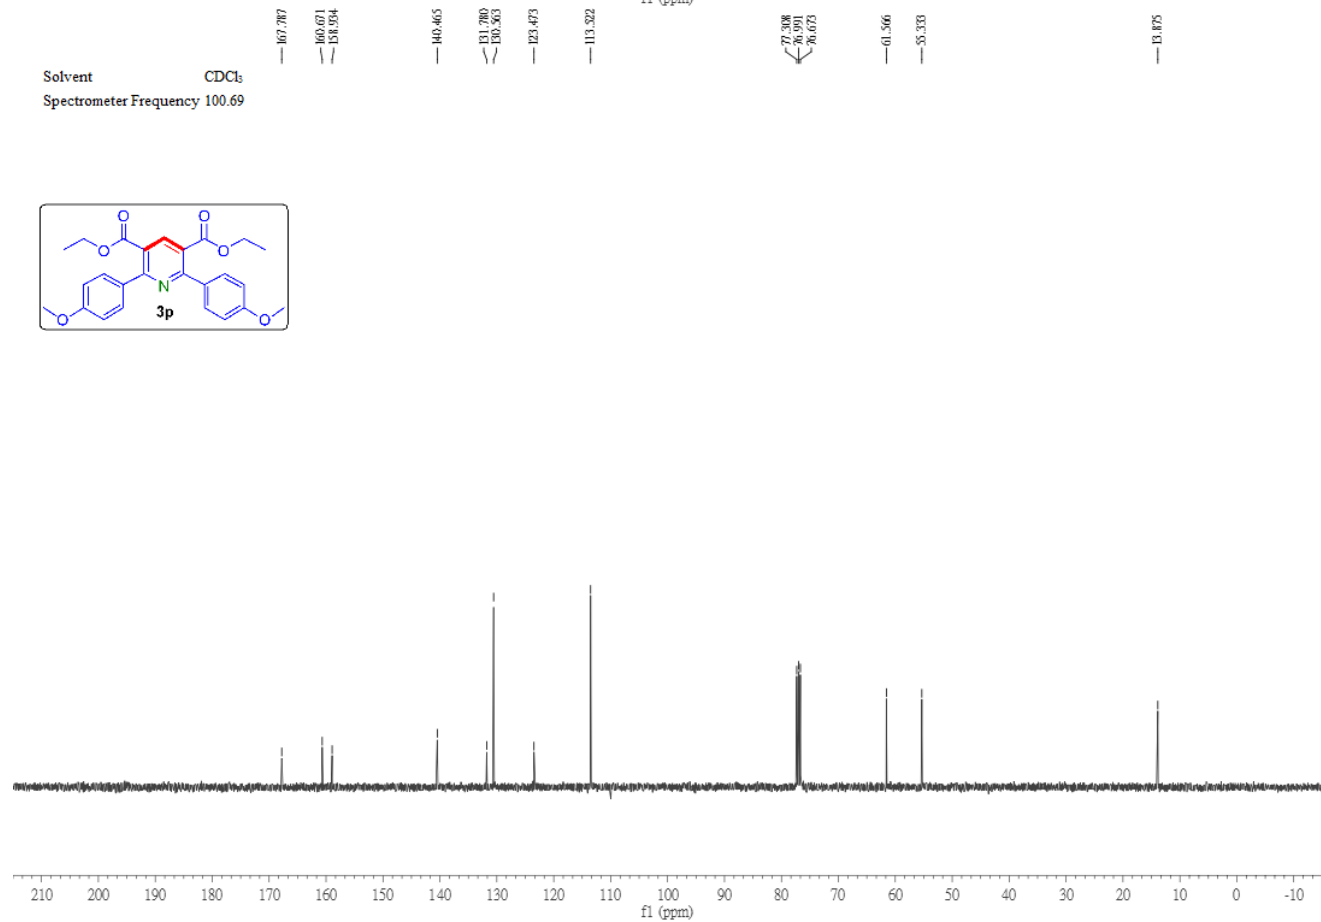

Solvent  $\text{CDCl}_3$   
 Spectrometer Frequency 400.40  
 Nucleus  $^1\text{H}$

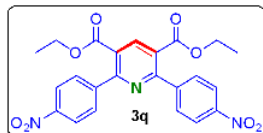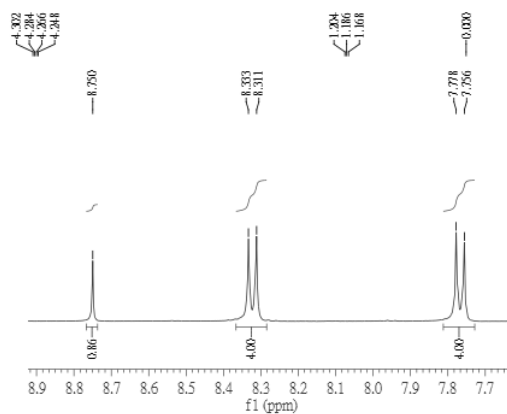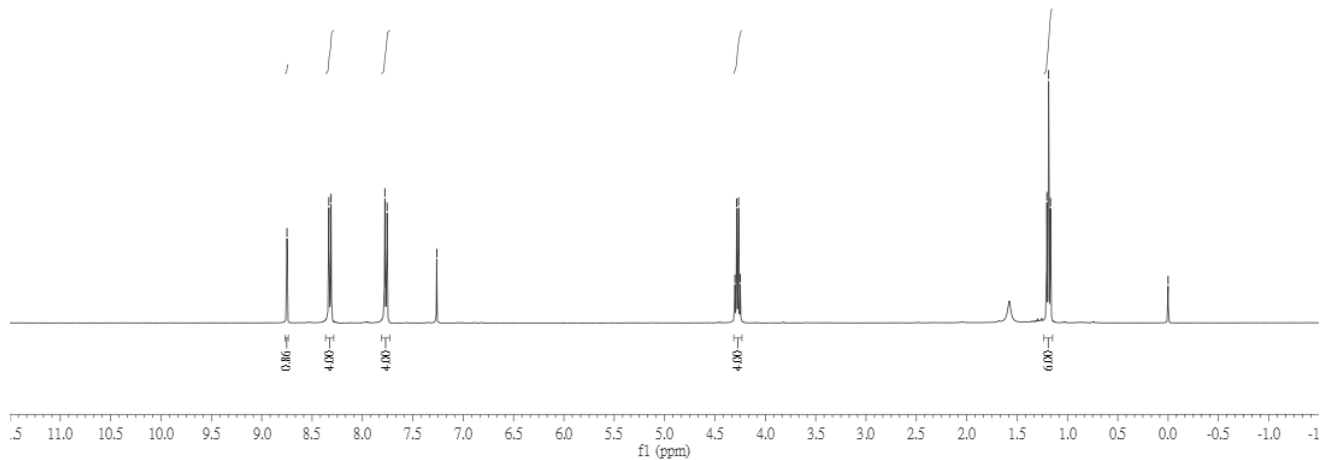

Solvent  $\text{CDCl}_3$   
 Spectrometer Frequency 100.69  
 Nucleus  $^{13}\text{C}$

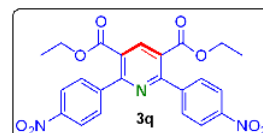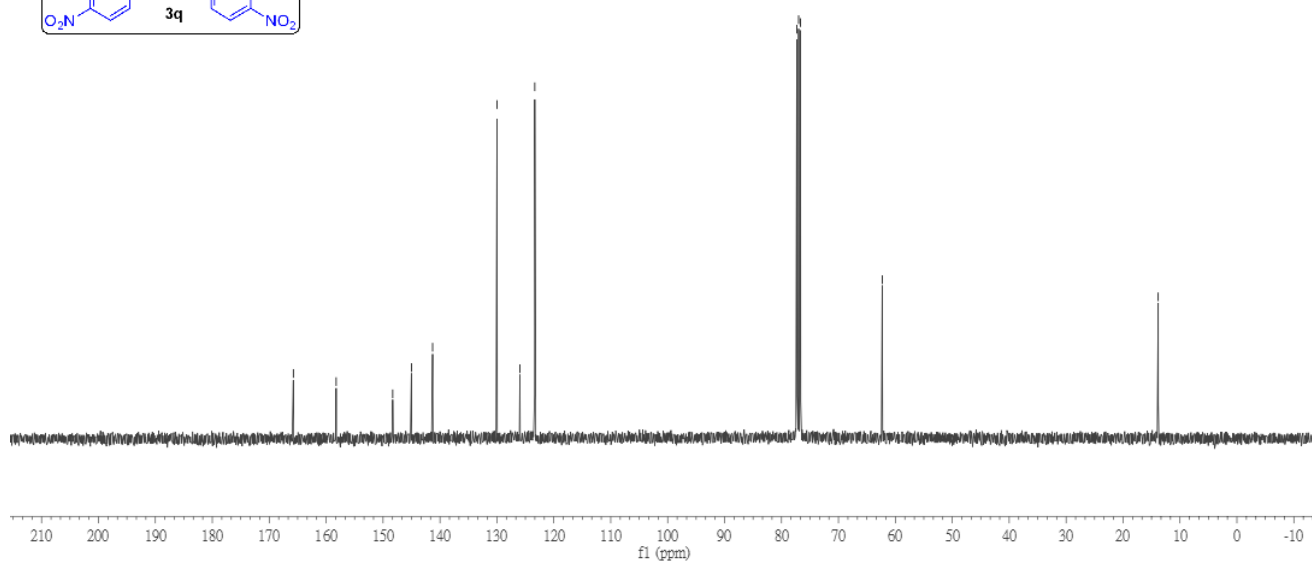

Solvent  $\text{CDCl}_3$   
Spectrometer Frequency 400.28

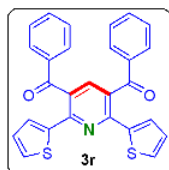

8.108  
7.766  
7.758  
7.753  
7.627  
7.241  
7.240  
7.239  
6.967  
6.966  
6.956

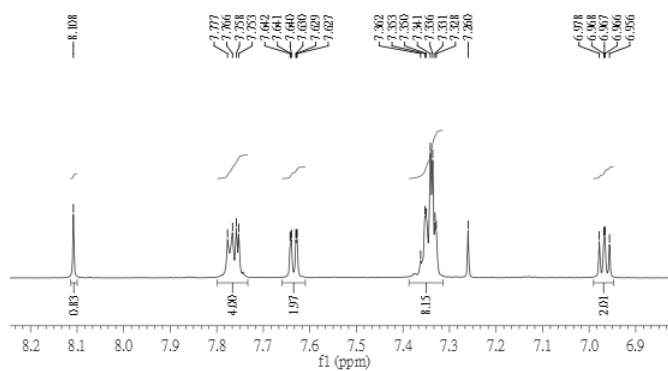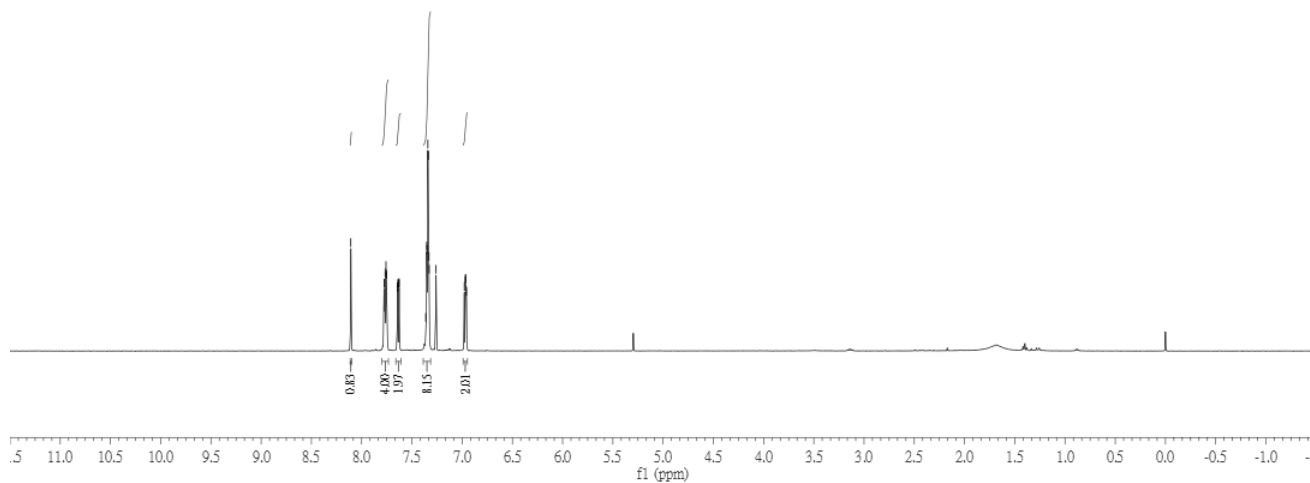

Solvent  $\text{CDCl}_3$   
Spectrometer Frequency 100.66

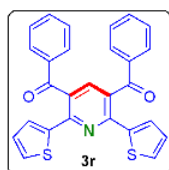

108.427

157.555

143.578

138.097

135.583

135.518

129.423

128.512

128.349

138.407

138.097

135.583

135.518

77.317

77.000

76.682

131.745

129.522

129.423

128.512

128.349

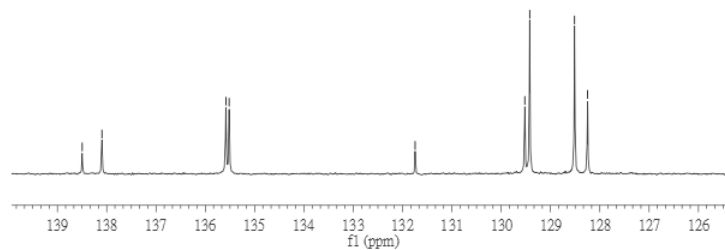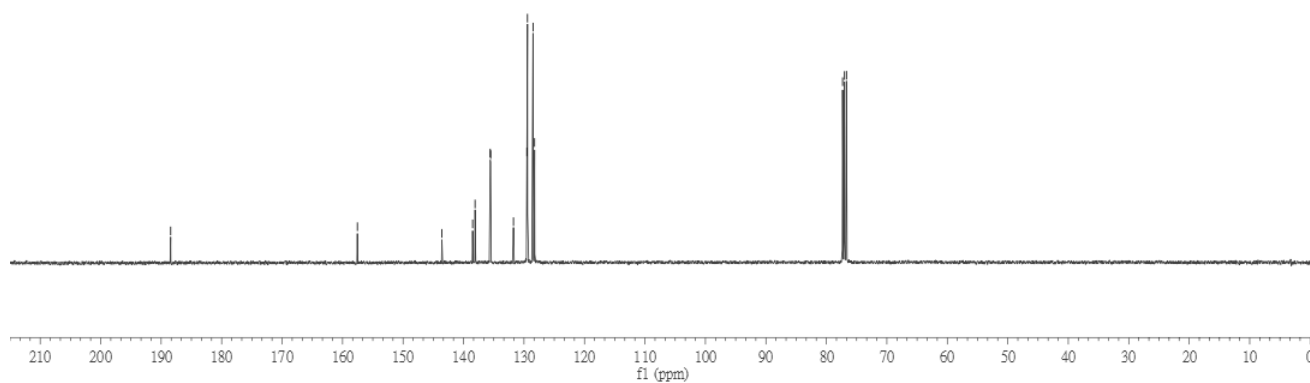

Solvent  $\text{CDCl}_3$   
Spectrometer Frequency 400.28  
Nucleus  $^1\text{H}$

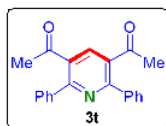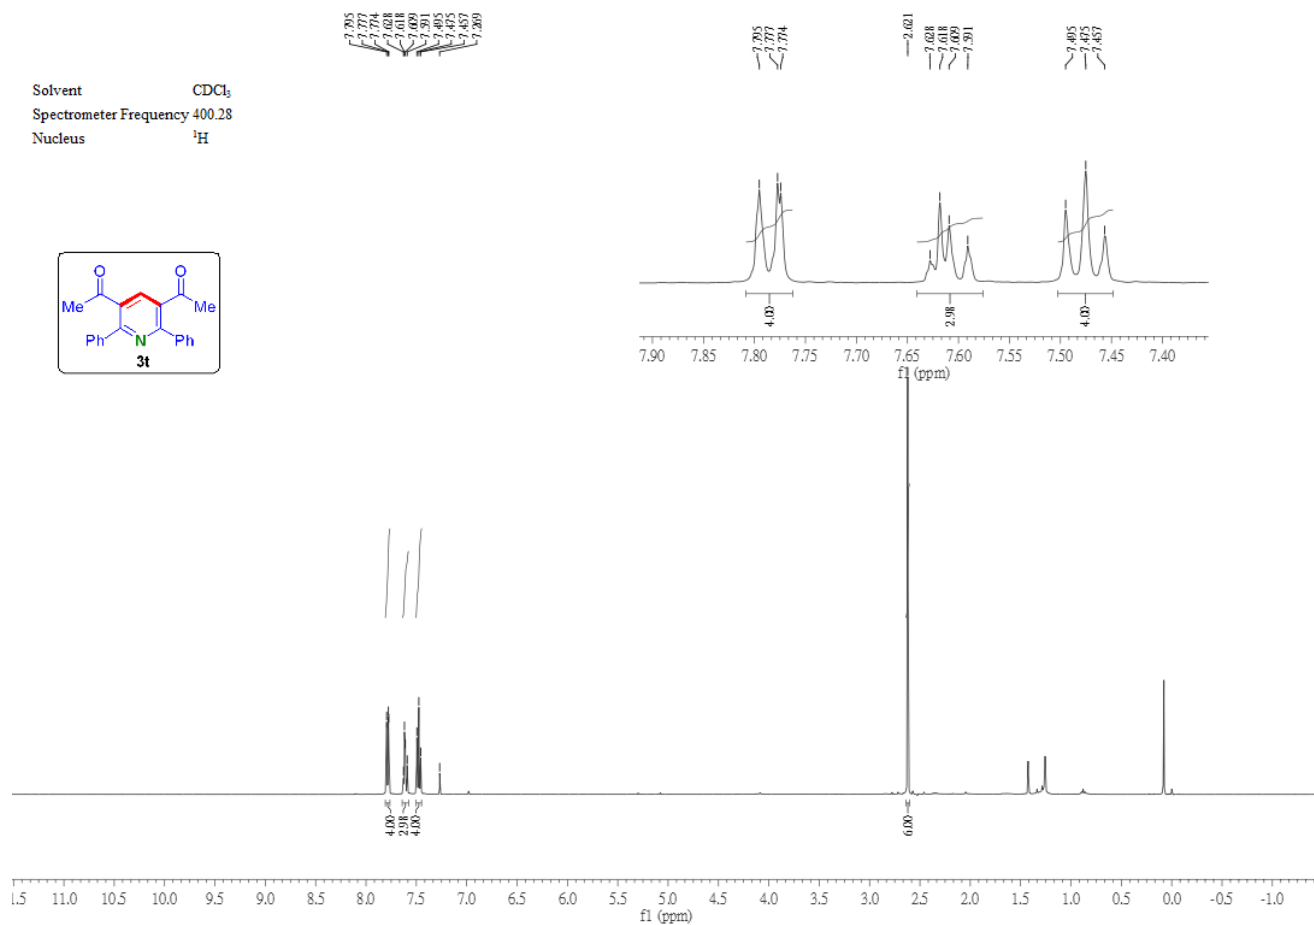

Solvent  $\text{CDCl}_3$   
Spectrometer Frequency 100.66  
Nucleus  $^{13}\text{C}$

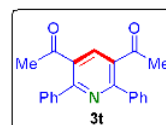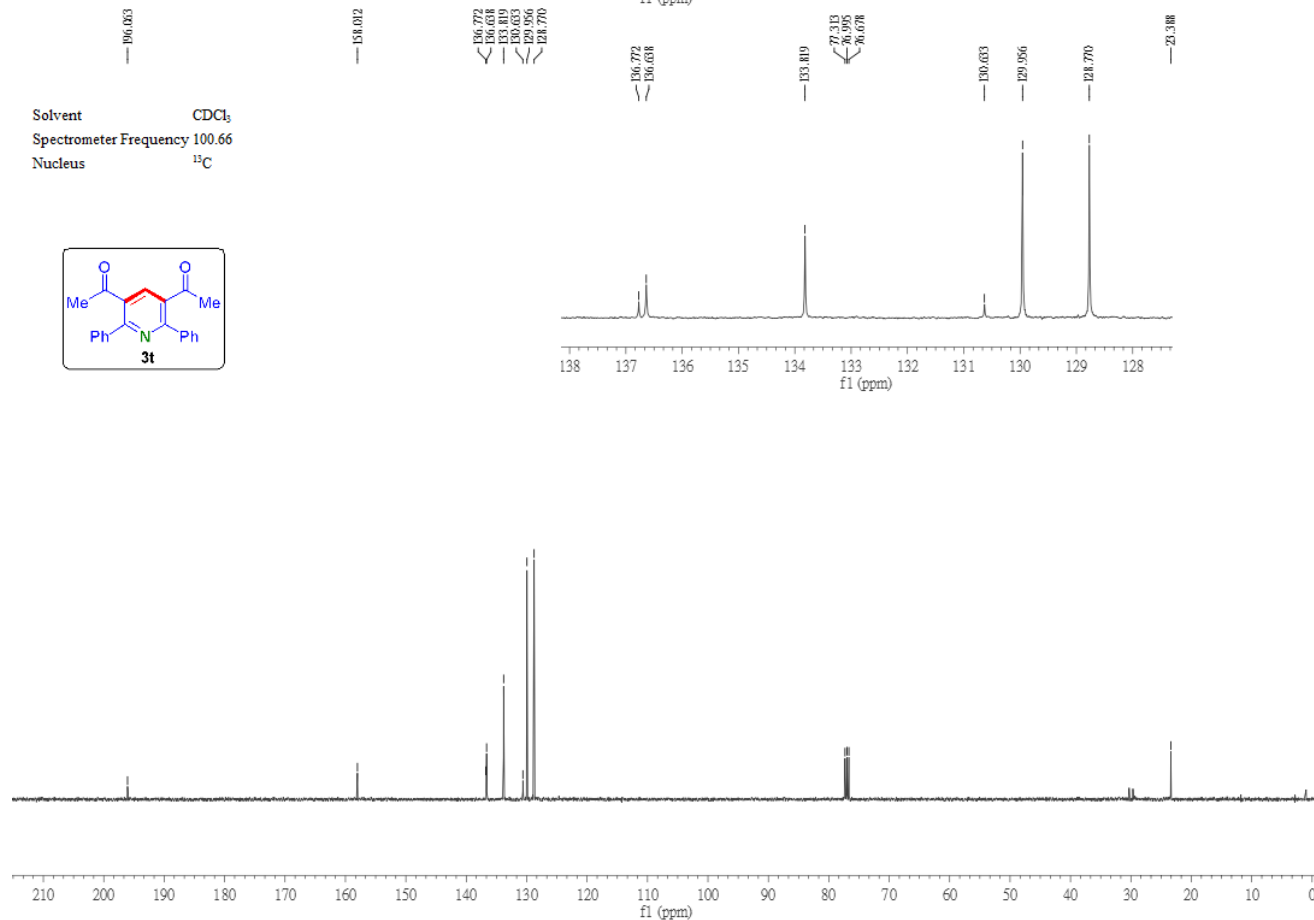

Solvent  $\text{CDCl}_3$   
Spectrometer Frequency 400.40

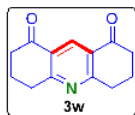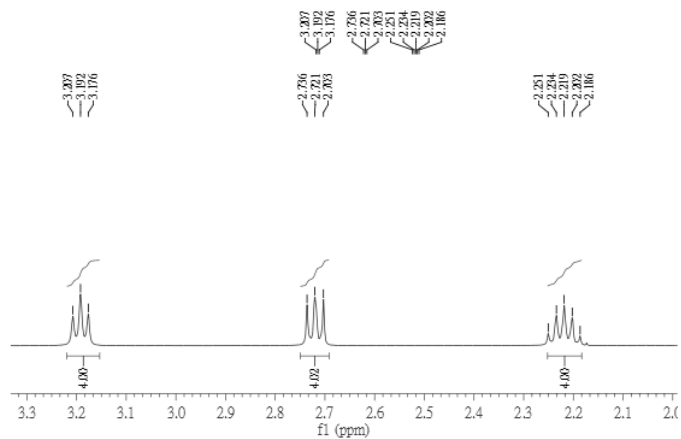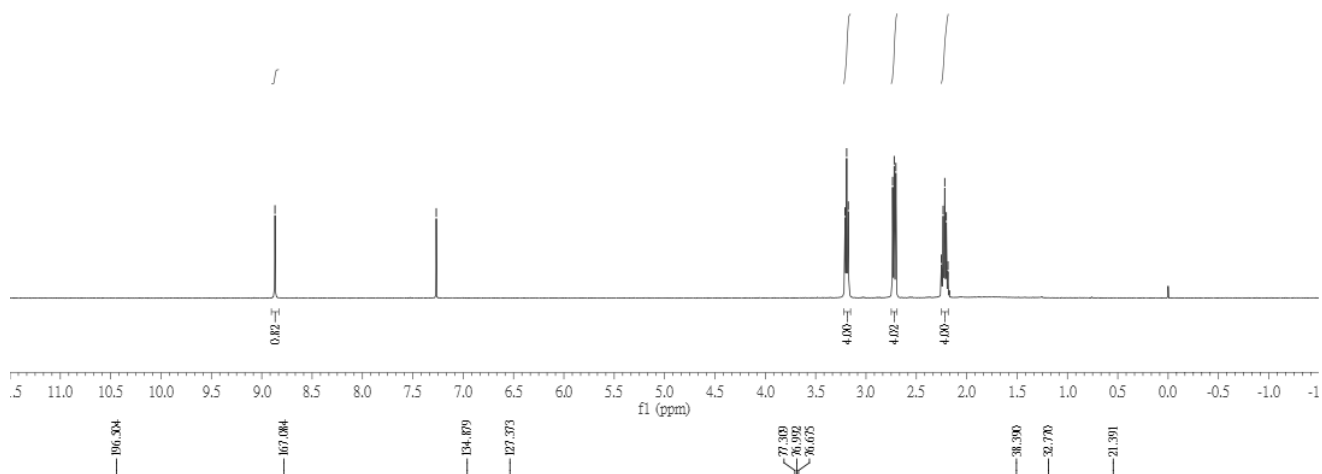

Solvent  $\text{CDCl}_3$   
Spectrometer Frequency 100.69

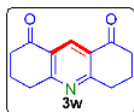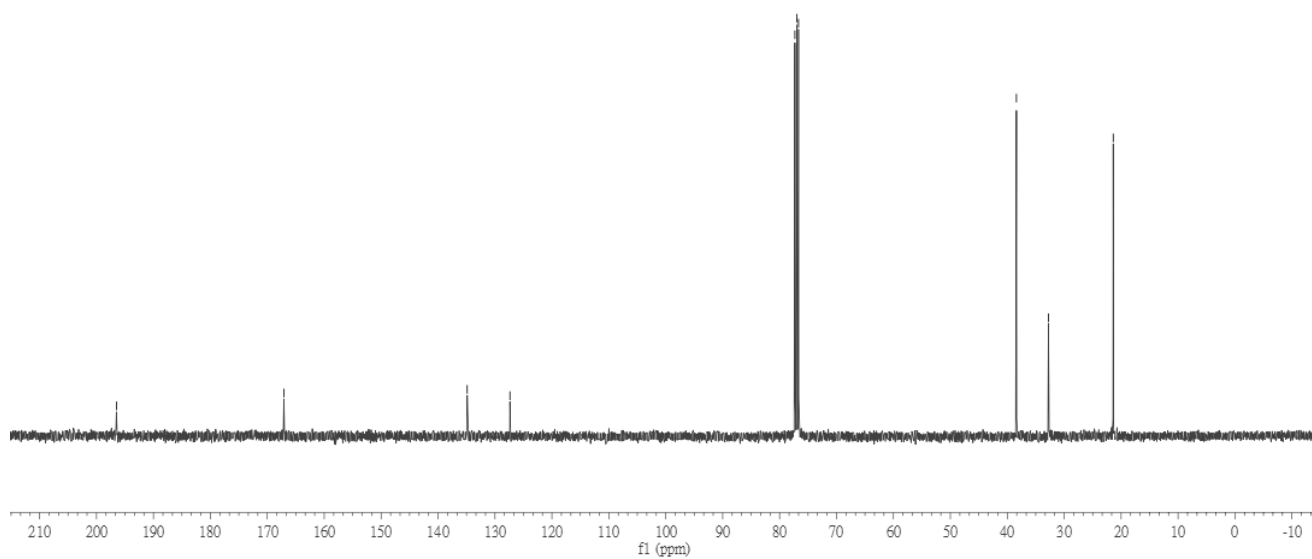

0.967  
0.949  
0.931

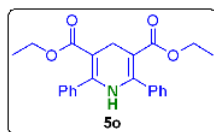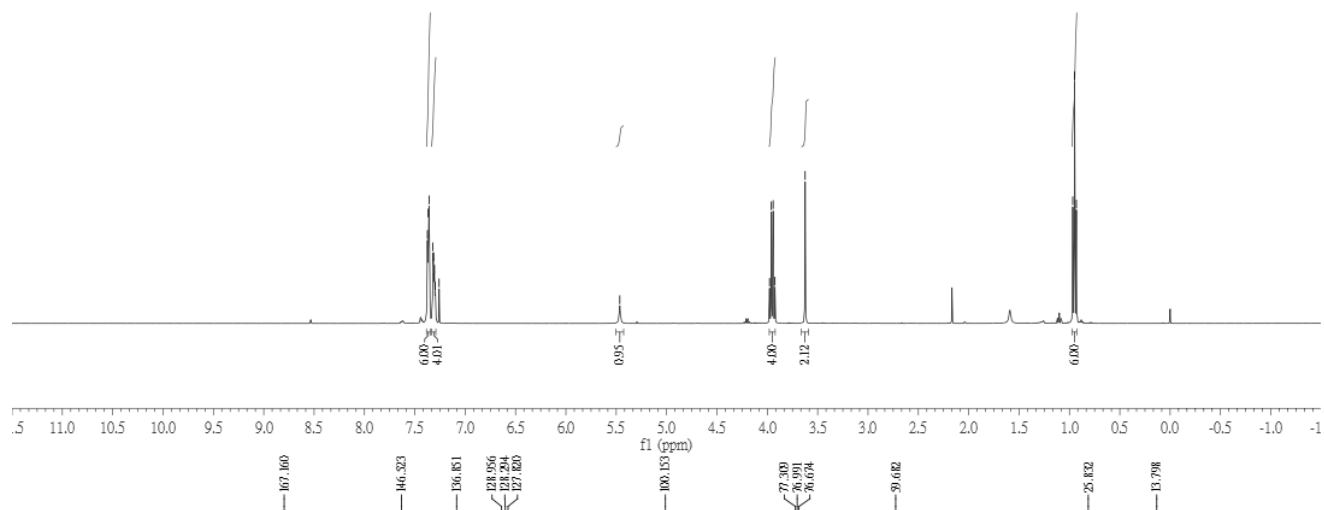

|                        |                   |
|------------------------|-------------------|
| Solvent                | CDCl <sub>3</sub> |
| Spectrometer Frequency | 100.69            |
| Nucleus                | <sup>13</sup> C   |

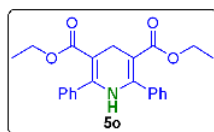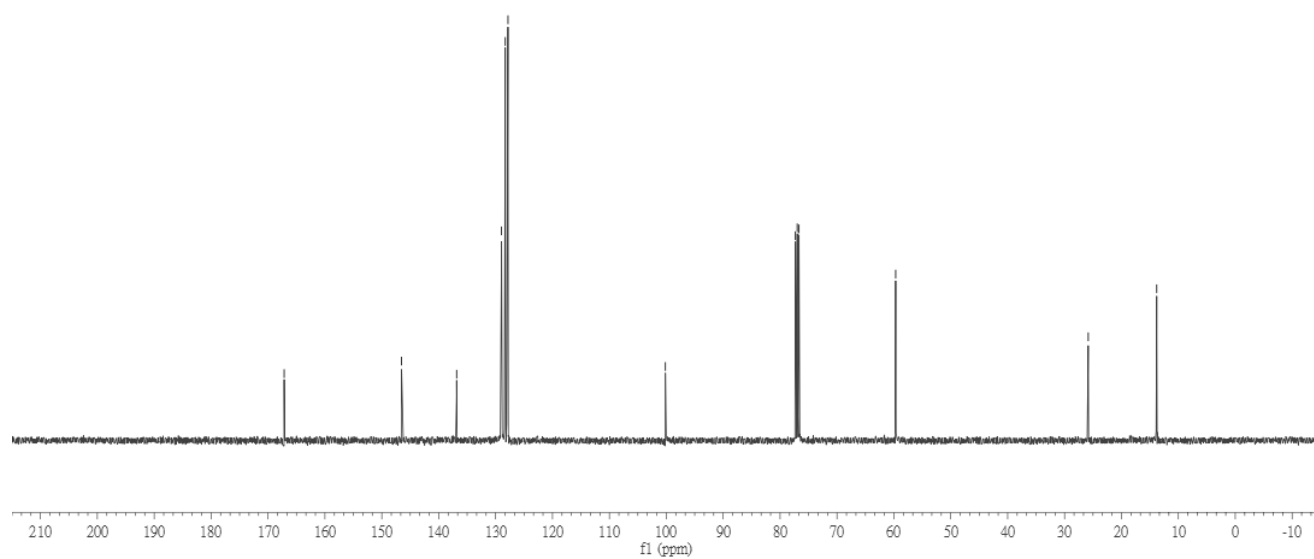

Solvent  $\text{CDCl}_3$   
Spectrometer Frequency 400.40  
Nucleus  $^1\text{H}$

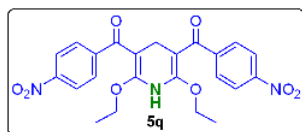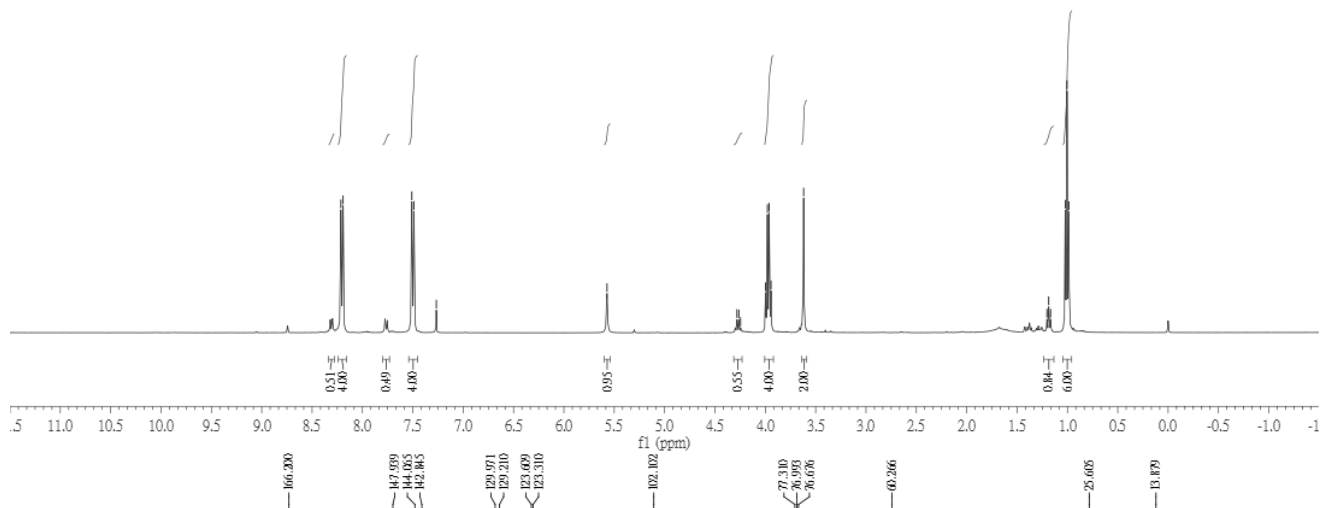

Solvent  $\text{CDCl}_3$   
Spectrometer Frequency 100.69  
Nucleus  $^{13}\text{C}$

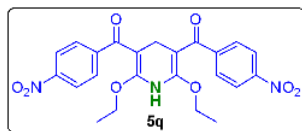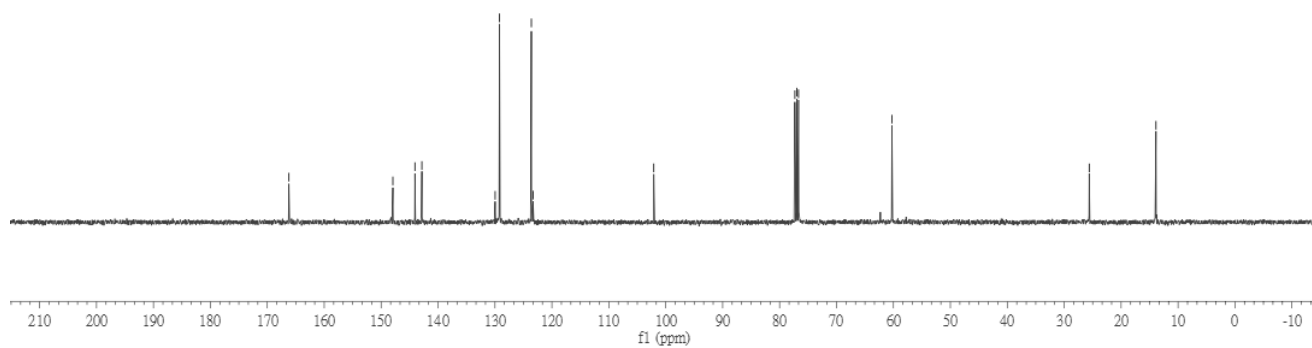



Solvent  $\text{CDCl}_3$   
Spectrometer Frequency 400.28  
Nucleus  $^1\text{H}$

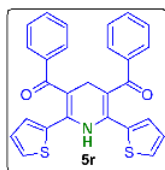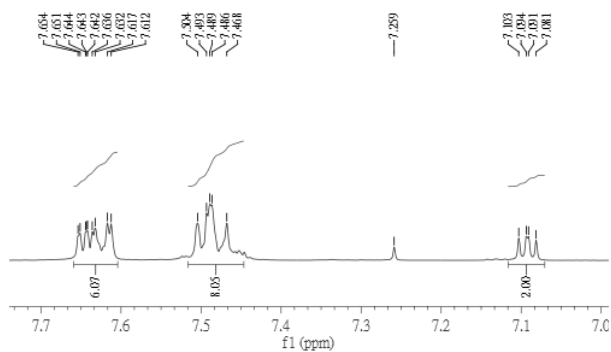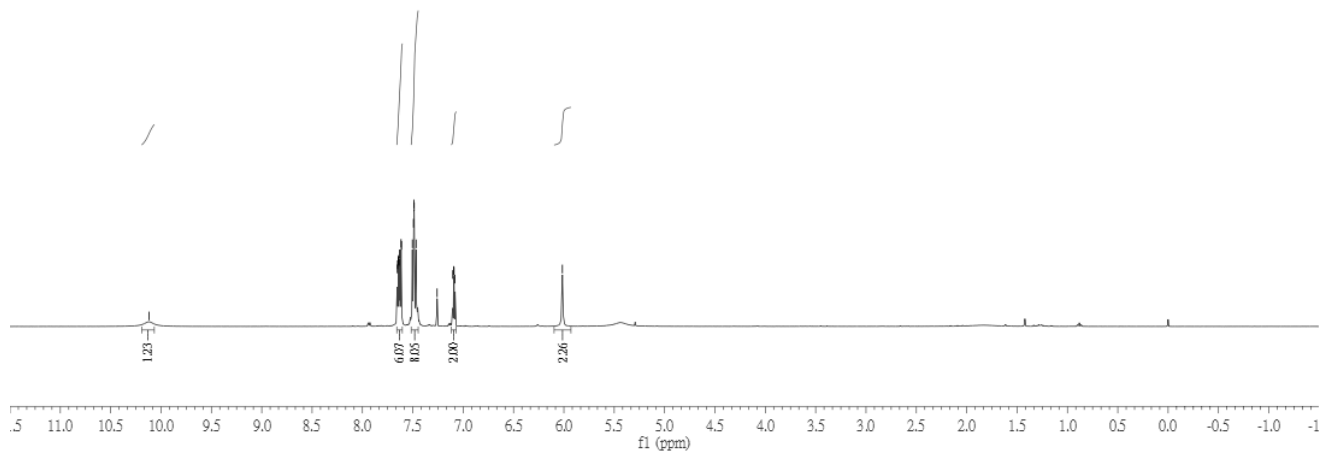

Solvent  $\text{CDCl}_3$   
Spectrometer Frequency 100.66  
Nucleus  $^{13}\text{C}$

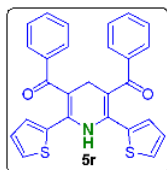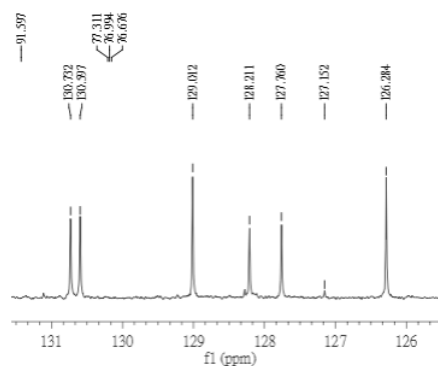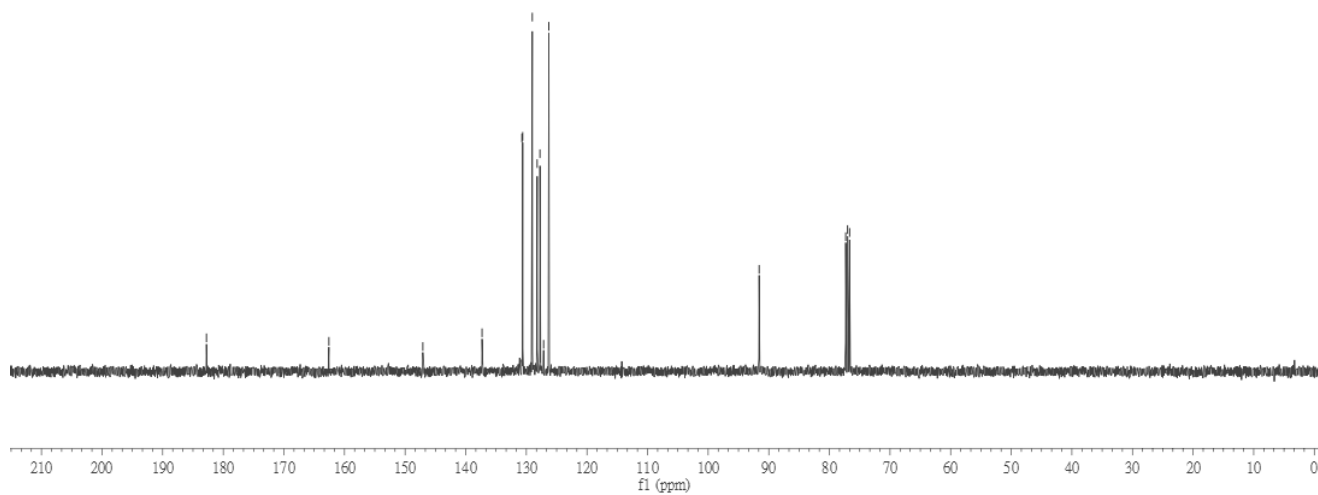

Solvent  $\text{CDCl}_3$   
Spectrometer Frequency 400.40  
Nucleus  $^1\text{H}$

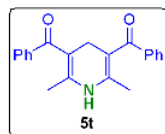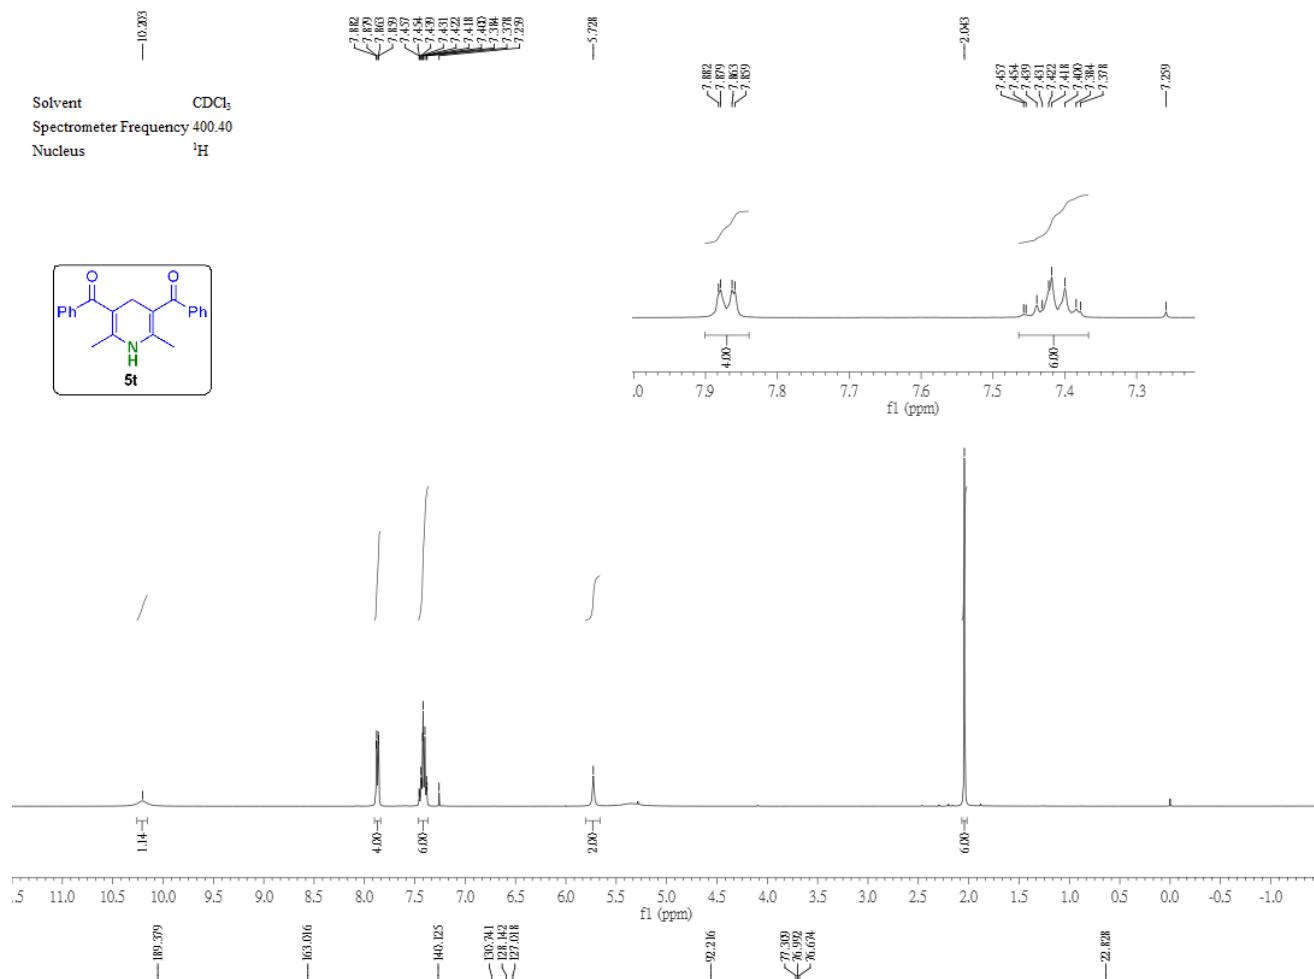

Solvent  $\text{CDCl}_3$   
Spectrometer Frequency 100.69  
Nucleus  $^{13}\text{C}$

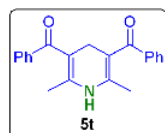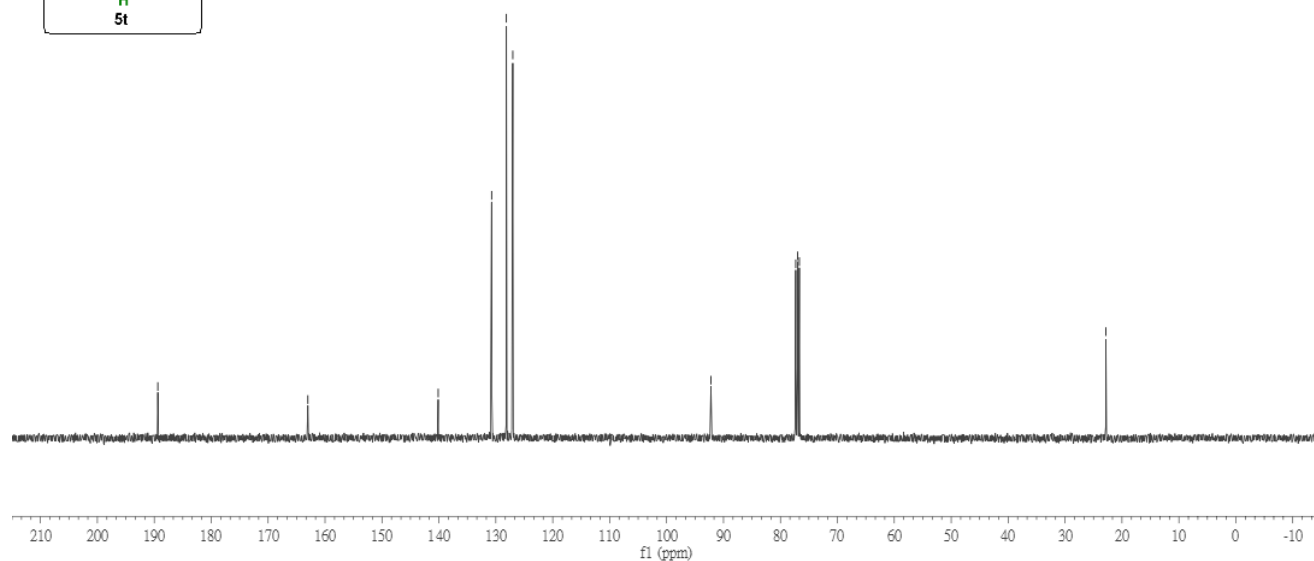

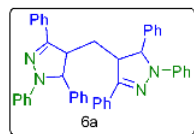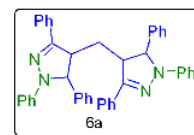

# checkCIF/PLATON report

Structure factors have been supplied for datablock(s) I

THIS REPORT IS FOR GUIDANCE ONLY. IF USED AS PART OF A REVIEW PROCEDURE FOR PUBLICATION, IT SHOULD NOT REPLACE THE EXPERTISE OF AN EXPERIENCED CRYSTALLOGRAPHIC REFEREE.

No syntax errors found.

[CIF dictionary](#)

[Interpreting this report](#)

## Datablock: I

---

Bond precision: C-C = 0.0065 A

Wavelength=0.71073

Cell: a=7.8605(5) b=11.7131(10) c=13.7225(7)  
alpha=90 beta=94.580(5) gamma=90  
Temperature: 143 K

|                | Calculated    | Reported      |
|----------------|---------------|---------------|
| Volume         | 1259.41(15)   | 1259.41(15)   |
| Space group    | P 21          | P 1 21 1      |
| Hall group     | P 2yb         | P 2yb         |
| Moiety formula | C31 H22 F2 O4 | C31 H22 F2 O4 |
| Sum formula    | C31 H22 F2 O4 | C31 H22 F2 O4 |
| Mr             | 496.49        | 496.48        |
| Dx,g cm-3      | 1.309         | 1.309         |
| Z              | 2             | 2             |
| Mu (mm-1)      | 0.096         | 0.096         |
| F000           | 516.0         | 516.0         |
| F000'          | 516.30        |               |
| h,k,lmax       | 9,13,16       | 9,13,16       |
| Nref           | 4435[ 2338]   | 4297          |
| Tmin,Tmax      |               | 0.726,1.000   |
| Tmin'          |               |               |

Correction method= # Reported T Limits: Tmin=0.726 Tmax=1.000  
AbsCorr = MULTI-SCAN

Data completeness= 1.84/0.97

Theta(max)= 24.997

R(reflections)= 0.0534( 3603)

wR2(reflections)= 0.1473( 4297)

S = 1.011

Npar= 336

---

The following ALERTS were generated. Each ALERT has the format

**test-name\_ALERT\_alert-type\_alert-level.**

Click on the hyperlinks for more details of the test.

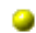

### Alert level C

|                          |                                                                                                                                                                        |              |
|--------------------------|------------------------------------------------------------------------------------------------------------------------------------------------------------------------|--------------|
| <u>DIFMX02 ALERT 1 C</u> | The maximum difference density is > 0.1*ZMAX*0.75<br>The relevant atom site should be identified.                                                                      |              |
| <u>STRVA01 ALERT 4 C</u> | Flack parameter is too small<br>From the CIF: <code>_refine_ls_abs_structure_Flack</code> -0.700<br>From the CIF: <code>_refine_ls_abs_structure_Flack_su</code> 1.400 |              |
| <u>PLAT053 ALERT 1 C</u> | Minimum Crystal Dimension Missing (or Error) ...                                                                                                                       | Please Check |
| <u>PLAT054 ALERT 1 C</u> | Medium Crystal Dimension Missing (or Error) ...                                                                                                                        | Please Check |
| <u>PLAT089 ALERT 3 C</u> | Poor Data / Parameter Ratio (Zmax < 18) .....                                                                                                                          | 6.90 Note    |
| <u>PLAT094 ALERT 2 C</u> | Ratio of Maximum / Minimum Residual Density ....                                                                                                                       | 3.56 Report  |
| <u>PLAT097 ALERT 2 C</u> | Large Reported Max. (Positive) Residual Density                                                                                                                        | 0.85 eA-3    |
| <u>PLAT230 ALERT 2 C</u> | Hirshfeld Test Diff for F2 --C22                                                                                                                                       | 5.2 s.u.     |
| <u>PLAT340 ALERT 3 C</u> | Low Bond Precision on C-C Bonds .....                                                                                                                                  | 0.0065 Ang.  |
| <u>PLAT911 ALERT 3 C</u> | Missing FCF Refl Between Thmin & STh/L= 0.595                                                                                                                          | 21 Report    |

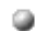

### Alert level G

|                          |                                                  |              |
|--------------------------|--------------------------------------------------|--------------|
| <u>PLAT003 ALERT 2 G</u> | Number of Uiso or Uij Restrained non-H Atoms ... | 37 Report    |
| <u>PLAT032 ALERT 4 G</u> | Std. Uncertainty on Flack Parameter Value High . | 1.400 Report |
| <u>PLAT072 ALERT 2 G</u> | SHELXL First Parameter in WGHT Unusually Large   | 0.10 Report  |
| <u>PLAT178 ALERT 4 G</u> | The CIF-Embedded .res File Contains SIMU Records | 1 Report     |
| <u>PLAT791 ALERT 4 G</u> | Model has Chirality at C2 (Sohnke SpGr)          | S Verify     |
| <u>PLAT791 ALERT 4 G</u> | Model has Chirality at C17 (Sohnke SpGr)         | R Verify     |
| <u>PLAT860 ALERT 3 G</u> | Number of Least-Squares Restraints .....         | 955 Note     |
| <u>PLAT870 ALERT 4 G</u> | ALERTS Related to Twinning Effects Suppressed .. | ! Info       |
| <u>PLAT909 ALERT 3 G</u> | Percentage of I>2sig(I) Data at Theta(Max) Still | 55% Note     |
| <u>PLAT910 ALERT 3 G</u> | Missing # of FCF Reflection(s) Below Theta(Min). | 1 Note       |
| <u>PLAT916 ALERT 2 G</u> | Hooft y and Flack x Parameter Values Differ by . | 0.30 Check   |
| <u>PLAT933 ALERT 2 G</u> | Number of OMIT Records in Embedded .res File ... | 34 Note      |

- 0 **ALERT level A** = Most likely a serious problem - resolve or explain  
0 **ALERT level B** = A potentially serious problem, consider carefully  
10 **ALERT level C** = Check. Ensure it is not caused by an omission or oversight  
12 **ALERT level G** = General information/check it is not something unexpected
- 3 ALERT type 1 CIF construction/syntax error, inconsistent or missing data  
7 ALERT type 2 Indicator that the structure model may be wrong or deficient  
6 ALERT type 3 Indicator that the structure quality may be low  
6 ALERT type 4 Improvement, methodology, query or suggestion  
0 ALERT type 5 Informative message, check

## checkCIF publication errors

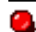

### Alert level A

|                          |                                                                                                                                                                                             |
|--------------------------|---------------------------------------------------------------------------------------------------------------------------------------------------------------------------------------------|
| <u>PUBL004 ALERT 1 A</u> | The contact author's name and address are missing,<br><code>_publ_contact_author_name</code> and <code>_publ_contact_author_address</code> .                                                |
| <u>PUBL005 ALERT 1 A</u> | <code>_publ_contact_author_email</code> , <code>_publ_contact_author_fax</code> and<br><code>_publ_contact_author_phone</code> are all missing.<br>At least one of these should be present. |
| <u>PUBL006 ALERT 1 A</u> | <code>_publ_requested_journal</code> is missing<br>e.g. 'Acta Crystallographica Section C'                                                                                                  |
| <u>PUBL008 ALERT 1 A</u> | <code>_publ_section_title</code> is missing. Title of paper.                                                                                                                                |
| <u>PUBL009 ALERT 1 A</u> | <code>_publ_author_name</code> is missing. List of author(s) name(s).                                                                                                                       |
| <u>PUBL010 ALERT 1 A</u> | <code>_publ_author_address</code> is missing. Author(s) address(es).                                                                                                                        |

**PUBL012\_ALERT\_1\_A** \_publ\_section\_abstract is missing.  
Abstract of paper in English.

---

7 **ALERT level A** = Data missing that is essential or data in wrong format  
0 **ALERT level G** = General alerts. Data that may be required is missing

---

## Publication of your CIF

You should attempt to resolve as many as possible of the alerts in all categories. Often the minor alerts point to easily fixed oversights, errors and omissions in your CIF or refinement strategy, so attention to these fine details can be worthwhile. In order to resolve some of the more serious problems it may be necessary to carry out additional measurements or structure refinements. However, the nature of your study may justify the reported deviations from journal submission requirements and the more serious of these should be commented upon in the discussion or experimental section of a paper or in the "special\_details" fields of the CIF. *checkCIF* was carefully designed to identify outliers and unusual parameters, but every test has its limitations and alerts that are not important in a particular case may appear. Conversely, the absence of alerts does not guarantee there are no aspects of the results needing attention. It is up to the individual to critically assess their own results and, if necessary, seek expert advice.

If level A alerts remain, which you believe to be justified deviations, and you intend to submit this CIF for publication in a journal, you should additionally insert an explanation in your CIF using the Validation Reply Form (VRF) below. This will allow your explanation to be considered as part of the review process.

## Validation response form

Please find below a validation response form (VRF) that can be filled in and pasted into your CIF.

```
# start Validation Reply Form
_vrf_PUBL004_GLOBAL
;
PROBLEM: The contact author's name and address are missing,
RESPONSE: ...
;
_vrf_PUBL005_GLOBAL
;
PROBLEM: _publ_contact_author_email, _publ_contact_author_fax and
RESPONSE: ...
;
_vrf_PUBL006_GLOBAL
;
PROBLEM: _publ_requested_journal is missing
RESPONSE: ...
;
_vrf_PUBL008_GLOBAL
;
PROBLEM: _publ_section_title is missing. Title of paper.
RESPONSE: ...
;
_vrf_PUBL009_GLOBAL
;
PROBLEM: _publ_author_name is missing. List of author(s) name(s).
RESPONSE: ...
;
```

```

_vrf_PUBL010_GLOBAL
;
PROBLEM: _publ_author_address is missing. Author(s) address(es).
RESPONSE: ...
;
_vrf_PUBL012_GLOBAL
;
PROBLEM: _publ_section_abstract is missing.
RESPONSE: ...
;
# end Validation Reply Form

```

If you wish to submit your CIF for publication in Acta Crystallographica Section C or E, you should upload your CIF via [the web](#). If you wish to submit your CIF for publication in IUCrData you should upload your CIF via [the web](#). If your CIF is to form part of a submission to another IUCr journal, you will be asked, either during electronic [submission](#) or by the Co-editor handling your paper, to upload your CIF via our web site.

---

### PLATON version of 22/03/2021; check.def file version of 19/03/2021

Datablock I - ellipsoid plot

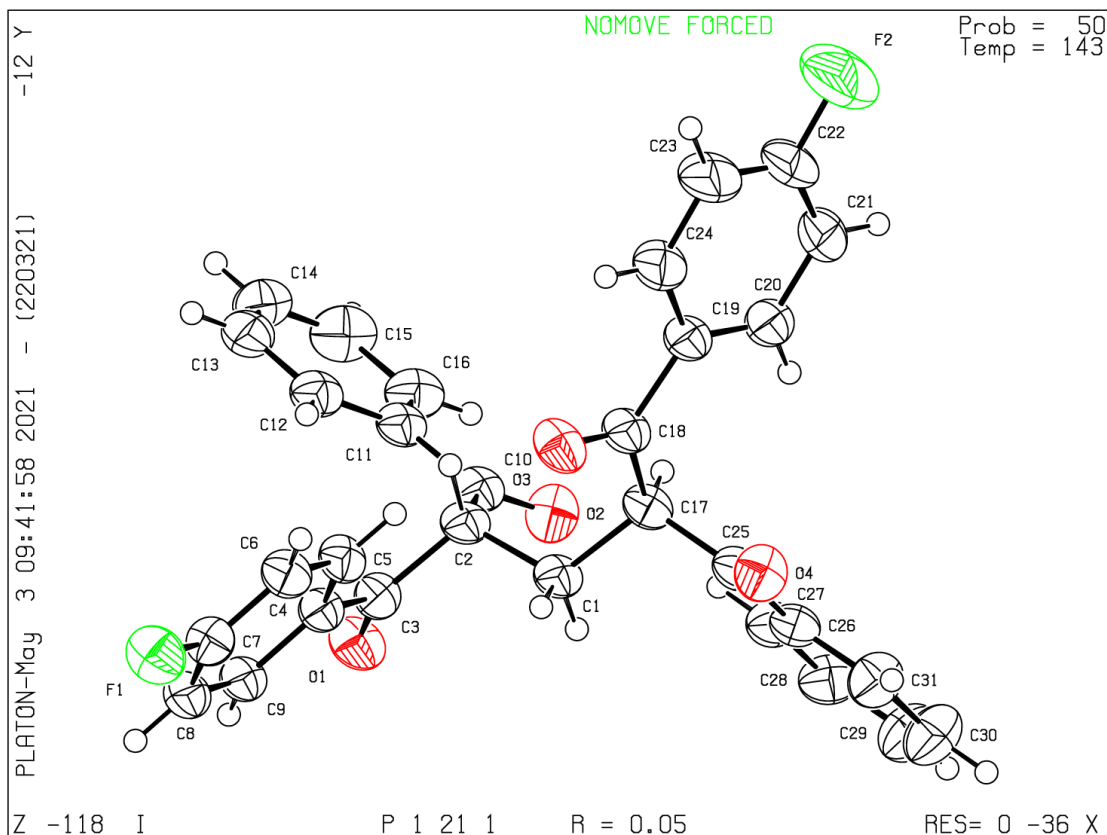

# checkCIF/PLATON report

Structure factors have been supplied for datablock(s) I

THIS REPORT IS FOR GUIDANCE ONLY. IF USED AS PART OF A REVIEW PROCEDURE FOR PUBLICATION, IT SHOULD NOT REPLACE THE EXPERTISE OF AN EXPERIENCED CRYSTALLOGRAPHIC REFEREE.

No syntax errors found.

[CIF dictionary](#)

[Interpreting this report](#)

## Datablock: I

---

Bond precision: C-C = 0.0016 Å

Wavelength=0.71073

Cell: a=5.9854(1) b=20.6879(4) c=18.0213(3)  
alpha=90 beta=95.780(2) gamma=90  
Temperature: 113 K

|                | Calculated   | Reported     |
|----------------|--------------|--------------|
| Volume         | 2220.15(7)   | 2220.15(7)   |
| Space group    | P 21/n       | P 1 21/n 1   |
| Hall group     | -P 2yn       | -P 2yn       |
| Moiety formula | C31 H21 N O2 | C31 H21 N O2 |
| Sum formula    | C31 H21 N O2 | C31 H21 N O2 |
| Mr             | 439.49       | 439.49       |
| Dx,g cm-3      | 1.315        | 1.315        |
| Z              | 4            | 4            |
| Mu (mm-1)      | 0.082        | 0.082        |
| F000           | 920.0        | 920.0        |
| F000'          | 920.39       |              |
| h,k,lmax       | 7,26,23      | 7,26,22      |
| Nref           | 4878         | 4684         |
| Tmin,Tmax      | 0.976,0.976  | 0.808,1.000  |
| Tmin'          | 0.976        |              |

Correction method= # Reported T Limits: Tmin=0.808 Tmax=1.000  
AbsCorr = MULTI-SCAN

Data completeness= 0.960

Theta(max)= 27.035

R(reflections)= 0.0358( 4037)

wR2(reflections)= 0.0935( 4684)

S = 1.067

Npar= 307

---

The following ALERTS were generated. Each ALERT has the format

**test-name\_ALERT\_alert-type\_alert-level.**

Click on the hyperlinks for more details of the test.



---

### Alert level G

|                          |                                                  |          |
|--------------------------|--------------------------------------------------|----------|
| <u>PLAT910_ALERT_3_G</u> | Missing # of FCF Reflection(s) Below Theta(Min). | 1 Note   |
| <u>PLAT912_ALERT_4_G</u> | Missing # of FCF Reflections Above STh/L= 0.600  | 191 Note |
| <u>PLAT933_ALERT_2_G</u> | Number of OMIT Records in Embedded .res File ... | 3 Note   |
| <u>PLAT978_ALERT_2_G</u> | Number C-C Bonds with Positive Residual Density. | 21 Info  |

---

- 0 **ALERT level A** = Most likely a serious problem - resolve or explain  
0 **ALERT level B** = A potentially serious problem, consider carefully  
0 **ALERT level C** = Check. Ensure it is not caused by an omission or oversight  
4 **ALERT level G** = General information/check it is not something unexpected
- 0 ALERT type 1 CIF construction/syntax error, inconsistent or missing data  
2 ALERT type 2 Indicator that the structure model may be wrong or deficient  
1 ALERT type 3 Indicator that the structure quality may be low  
1 ALERT type 4 Improvement, methodology, query or suggestion  
0 ALERT type 5 Informative message, check
- 

## checkCIF publication errors

---

### Alert level A

|                          |                                                                                                                                                     |
|--------------------------|-----------------------------------------------------------------------------------------------------------------------------------------------------|
| <u>PUBL004_ALERT_1_A</u> | The contact author's name and address are missing,<br>_publ_contact_author_name and _publ_contact_author_address.                                   |
| <u>PUBL005_ALERT_1_A</u> | _publ_contact_author_email, _publ_contact_author_fax and<br>_publ_contact_author_phone are all missing.<br>At least one of these should be present. |
| <u>PUBL006_ALERT_1_A</u> | _publ_requested_journal is missing<br>e.g. 'Acta Crystallographica Section C'                                                                       |
| <u>PUBL008_ALERT_1_A</u> | _publ_section_title is missing. Title of paper.                                                                                                     |
| <u>PUBL009_ALERT_1_A</u> | _publ_author_name is missing. List of author(s) name(s).                                                                                            |
| <u>PUBL010_ALERT_1_A</u> | _publ_author_address is missing. Author(s) address(es).                                                                                             |
| <u>PUBL012_ALERT_1_A</u> | _publ_section_abstract is missing.<br>Abstract of paper in English.                                                                                 |

---

- 7 **ALERT level A** = Data missing that is essential or data in wrong format  
0 **ALERT level G** = General alerts. Data that may be required is missing
-

## Publication of your CIF

You should attempt to resolve as many as possible of the alerts in all categories. Often the minor alerts point to easily fixed oversights, errors and omissions in your CIF or refinement strategy, so attention to these fine details can be worthwhile. In order to resolve some of the more serious problems it may be necessary to carry out additional measurements or structure refinements. However, the nature of your study may justify the reported deviations from journal submission requirements and the more serious of these should be commented upon in the discussion or experimental section of a paper or in the "special\_details" fields of the CIF. *checkCIF* was carefully designed to identify outliers and unusual parameters, but every test has its limitations and alerts that are not important in a particular case may appear. Conversely, the absence of alerts does not guarantee there are no aspects of the results needing attention. It is up to the individual to critically assess their own results and, if necessary, seek expert advice.

If level A alerts remain, which you believe to be justified deviations, and you intend to submit this CIF for publication in a journal, you should additionally insert an explanation in your CIF using the Validation Reply Form (VRF) below. This will allow your explanation to be considered as part of the review process.

## Validation response form

Please find below a validation response form (VRF) that can be filled in and pasted into your CIF.

```
# start Validation Reply Form
_vrf_PUBL004_GLOBAL
;
PROBLEM: The contact author's name and address are missing,
RESPONSE: ...
;
_vrf_PUBL005_GLOBAL
;
PROBLEM: _publ_contact_author_email, _publ_contact_author_fax and
RESPONSE: ...
;
_vrf_PUBL006_GLOBAL
;
PROBLEM: _publ_requested_journal is missing
RESPONSE: ...
;
_vrf_PUBL008_GLOBAL
;
PROBLEM: _publ_section_title is missing. Title of paper.
RESPONSE: ...
;
_vrf_PUBL009_GLOBAL
;
PROBLEM: _publ_author_name is missing. List of author(s) name(s).
RESPONSE: ...
;
_vrf_PUBL010_GLOBAL
;
PROBLEM: _publ_author_address is missing. Author(s) address(es).
RESPONSE: ...
;
_vrf_PUBL012_GLOBAL
;
```

PROBLEM: \_publ\_section\_abstract is missing.  
RESPONSE: ...  
;  
# end Validation Reply Form

If you wish to submit your CIF for publication in Acta Crystallographica Section C or E, you should upload your CIF via [the web](#). If you wish to submit your CIF for publication in IUCrData you should upload your CIF via [the web](#). If your CIF is to form part of a submission to another IUCr journal, you will be asked, either during electronic [submission](#) or by the Co-editor handling your paper, to upload your CIF via our web site.

---

**PLATON version of 22/03/2021; check.def file version of 19/03/2021**

Datablock 1 - ellipsoid plot

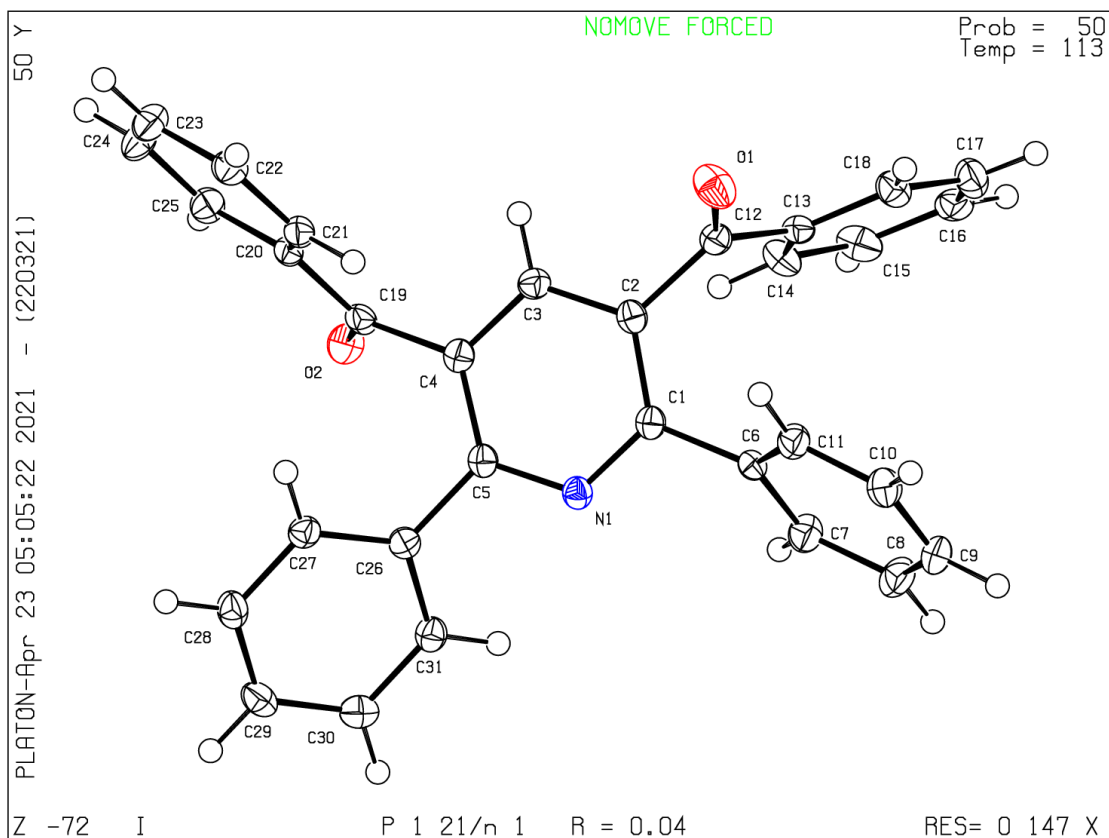

Supplement: d1ob02290c1.pdf [file d1ob02290c1.pdf]
